1 **Quantification of *nosZ* genes and transcripts in activated sludge microbiomes with novel group-**  
2 **specific qPCR methods validated with metagenomic analyses**

3

4 DaeHyun D. Kim<sup>a</sup>, Doyoung Park<sup>a\*</sup>, Hyun Yoon<sup>a†</sup>, Taeho Yun<sup>a</sup>, Min Joon Song<sup>a</sup>, and Sukhwan  
5 Yoon<sup>a#</sup>

6

7 <sup>a</sup>Department of Civil and Environmental Engineering, Korea Advanced Institute of Science and  
8 Technology (KAIST)

9

10 **Running Head:** Quantification of *nosZ* with group-specific qPCR

11

12 #Address correspondence to Sukhwan Yoon, [syoon80@kaist.ac.kr](mailto:syoon80@kaist.ac.kr)

13 \*Present address: Department of Civil and Environmental Engineering, Georgia Institute of  
14 Technology, Atlanta, Georgia, USA

15 †Present address: Department of Civil and Environmental Engineering, Cornell University, Ithaca,  
16 New York, USA

17

18

19

20

21

22

23

24

25

26

27

## 28 **Abstract**

29 Substantial N<sub>2</sub>O emission results from activated sludge nitrogen removal processes. The importance of  
30 N<sub>2</sub>O-reducers possessing NosZ-type N<sub>2</sub>O reductases have been recognized as the only N<sub>2</sub>O sink *in situ* key  
31 to determination of the net N<sub>2</sub>O emissions; however, reliable quantification methods for *nosZ* genes and  
32 transcripts have yet to be developed. Here, *nosZ* genes and transcripts in activated sludge tank  
33 microbiomes were analyzed with the group-specific qPCR assays designed *de novo* combining culture-  
34 based and computational approach. A sewage sample was enriched in a batch reactor fed continuous  
35 stream of N<sub>2</sub> containing 20-10,000 ppmv N<sub>2</sub>O, where 14 genera of potential N<sub>2</sub>O-reducers were identified.  
36 All available amino acid sequences of NosZ affiliated to these taxa were grouped into five subgroups (two  
37 clade I and three clade II groups), and primer/probe sets exclusively and comprehensively targeting the  
38 subgroups were designed and validated with *in silico* PCR. Four distinct activated sludge samples from  
39 three different wastewater treatment plants in Korea were analyzed with the qPCR assays and the results  
40 were validated by comparison with the shotgun metagenome analysis results. With the validated qPCR  
41 assays, the *nosZ* genes and transcripts of six additional activated sludge samples were analyzed and the  
42 results of the analyses clearly indicated the dominance of two clade II *nosZ* subgroups (*Flavobacterium*-  
43 like and *Dechloromonas*-like) among both *nosZ* gene and transcript pools.

44

## 45 **Introduction**

46 Nitrous oxide (N<sub>2</sub>O) is one of the three major greenhouse gases with the largest contributions to  
47 global warming, along with CO<sub>2</sub> and CH<sub>4</sub>.<sup>1</sup> Although the contribution of N<sub>2</sub>O is estimated to be only  
48 ~6% of the net greenhouse gas emissions in terms of CO<sub>2</sub>eq, which is far less than those of CO<sub>2</sub> and  
49 CH<sub>4</sub>, eliminating one molecule of N<sub>2</sub>O from the atmosphere has the same merit as removing ~300  
50 molecule of CO<sub>2</sub> due to its high global warming potential. Besides, N<sub>2</sub>O has also been the most  
51 consequential ozone depletion agent.<sup>2,3</sup> Thus, global efforts to curb the increase in atmospheric N<sub>2</sub>O  
52 concentration are necessitated for sustainable future. A better understanding of the biogeochemical  
53 reactions functioning as N<sub>2</sub>O sources and sinks in nitrogen-rich anthropogenic environments, e.g.,  
54 fertilized agricultural soils and wastewater treatment plants (WWTPs), is especially important for N<sub>2</sub>O  
55 emission mitigation, as nitrification and denitrification, the biological reactions serving as the major

56 sources of N<sub>2</sub>O, occur at consistent a basis in such environments and thus, they have been estimated  
57 as the hotspots of N<sub>2</sub>O emission to the atmosphere.<sup>4, 5</sup>

58

59 Particularly, the biological N<sub>2</sub>O reduction mediated by Nos-type nitrous oxide reductases (NosZ) has  
60 recently attracted immense scientific attention as the sole sink of N<sub>2</sub>O on the Earth's surface at non-  
61 elevated temperature.<sup>6-9</sup> This reaction had been, for long, known merely as one of the stepwise  
62 reactions constituting the denitrification pathway.<sup>4, 10</sup> Only recently has the N<sub>2</sub>O-to-N<sub>2</sub> reduction been  
63 recognized as an independent energy-conserving reaction, as diverse organisms possessing either  
64 conventional clade I and newly-discovered clade II *nosZ* were found to be capable of growth with  
65 N<sub>2</sub>O as the sole electron acceptor.<sup>9, 11-13</sup> Several independent research groups have reported difference  
66 between clade I and clade II *nosZ*-possessing organisms in terms of their affinities to N<sub>2</sub>O, and more  
67 specifically, the organisms with *nosZ* closely affiliated to *Dechloromonas* spp. have been reported  
68 with particularly low whole-cell Michaelis constants ( $K_{m,app}$ ), suggesting that this group of organisms  
69 may be involved in *in situ* consumption of low-concentration N<sub>2</sub>O produced via diverse biotic and  
70 abiotic processes<sup>9, 13-16</sup>. The microbial community developed in the laboratory-scale biofilter treating  
71 100 ppmv N<sub>2</sub>O included the clade II N<sub>2</sub>O reducer *Flavobacterium* spp. as the most abundant *nosZ*-  
72 carrying organisms, also supporting the significance of clade II N<sub>2</sub>O as an important N<sub>2</sub>O sink.<sup>17, 18</sup>

73

74 The NosZ-mediated N<sub>2</sub>O reduction has recently been recognized to have an immensely important role  
75 in various engineered wastewater treatment systems as the sole sink of N<sub>2</sub>O produced from  
76 denitrification and nitrification.<sup>12, 19-23</sup> In these recent studies, attempts have been made to correlate  
77 N<sub>2</sub>O reduction activities or net N<sub>2</sub>O emissions to *nosZ* gene/transcript abundances or the *nosZ*-to-  
78 (*nirS+nirK*) abundance ratios. Most, if not all, of these *nosZ* gene quantifications were performed  
79 using SYBR Green quantitative polymerase chain reactions (qPCR) targeting the clade I (1840F: 5'-  
80 CGCRACGGCAASAAGGTSMSST-3' / 2090R: 5'-CAKRTGCAKSGCRTGGCAGAA-3') and  
81 clade II *nosZ* (*nosZ*-II-F: 5'-CTIGGICCIYTKCAYAC-3' / *nosZ*-II-R: 5'-  
82 SKSACCTTITRCCITYICG-3').<sup>24, 25</sup> The reliability of these *nosZ* quantification results were  
83 questionable, due to unverified specificity and low amplification efficiency, and even the simplest

84 questions as to whether clade I or clade II *nosZ* were more abundant in nutrient removal bioreactors  
85 remains controversial.<sup>12, 26, 27</sup> In this study, we have developed TaqMan-based qPCR reactions  
86 targeting four groups (two clade I *nosZ* groups and two clade II *nosZ* groups) of *nosZ* with  
87 amplification efficiency above 90% and verified their coverage and specificity by comparing the  
88 quantification data with the results of shotgun metagenome analyses. Anoxic activated sludge samples  
89 from anoxic tanks of six conventional wastewater treatment plants in Korea with A2O (anaerobic-  
90 anoxic-oxic) configuration were then analyzed with these novel qPCR assays, and without exception,  
91 clade II domination of *nosZ* gene and transcript pools was verified.

92

### 93 **Materials and methods**

#### 94 **Sample collection**

95 The wastewater inoculum for the N<sub>2</sub>O enrichment experiments were grab-sampled from the anoxic  
96 section of the activated sludge tank at Daejeon municipal WWTP (36°23'5" N 127°24'28" E) in  
97 September 2016 (denoted as Daejeon1). Three activated sludge samples for validation of the qPCR  
98 assays by comparison with the metagenomics data were collected at the same WWTP (Daejeon2) in  
99 February 2019 and two other activated sludge WWTPs located in Gwangju and Gapyeong  
100 (35°09'22.4"N 126°49'51.6"E and 37°49'00.1"N 127°31'13.0"E, respectively) in January and  
101 February of 2019, respectively. Activated sludge samples from anoxic tanks of six other A2O  
102 (anaerobic/anoxic/oxic) WWTPs were then collected for group-specific quantification of *nosZ* genes  
103 and transcripts with the developed qPCR assays (Figure S1). Each wastewater sample for analyses of  
104 DNA was collected in a 2-L polyethylene bottle filled up to the brim to minimize oxygen ingress. The  
105 samples for quantification of *nosZ* transcripts were immediately mixed with the same volume of  
106 methanol for RNA fixation.<sup>28</sup> The sample bottles were immediately placed in a cooler and  
107 transported to the laboratory, where they were stored at -80°C until use.

108

109 **Fed-batch enrichment of activated sludge samples and identification of active N<sub>2</sub>O-reducing**  
110 **groups**

111 A simple fed-batch bioreactor was constructed for enrichment of active N<sub>2</sub>O-reducers in the Daejeon1  
112 wastewater sample (Figure S2). A 500-mL glass bottle with a side port (Duran, Mainz, Germany) was  
113 fitted with a GL45 cap with three ports. Two of the ports were used as the inlet for N<sub>2</sub>O-carrying gas  
114 and the gas outlet from the bottle and the remaining port was used for aqueous phase sampling. The  
115 side port of the glass bottle was used for sampling of the gaseous phase. The modified MR-1 medium  
116 was prepared by adding per 1 L of deionized water, 0.5 g NaCl, 0.41 g sodium acetate, 0.23 g  
117 KH<sub>2</sub>PO<sub>4</sub>, 0.46 g K<sub>2</sub>HPO<sub>4</sub>, 0.026 g NH<sub>4</sub>Cl, 1 ml of 1000X trace metal solution, and 1 mL of 1000X  
118 vitamin stock solution.<sup>29</sup> The reactor with 200-mL medium (40% of the total reactor volume) was  
119 continuously supplied with 0 ppmv, 20 ppmv, 200 ppmv, or 10,000 ppmv N<sub>2</sub>O prepared in >99.999%  
120 N<sub>2</sub> gas (Samoh Specialty Gas, Daejeon, South Korea) for 30 hours before inoculation. After  
121 inoculating the medium with 2 mL of the Daejeon1 sample, the same gas was bubbled through the  
122 medium at the volumetric flowrate of 20 mL min<sup>-1</sup> to provide the sole electron acceptor N<sub>2</sub>O to the  
123 microbial culture and maintain the reactor at anoxic condition. The reactor operated with >99.999%  
124 N<sub>2</sub> gas served as the control to confirm that the microbial consortia were enriched with N<sub>2</sub>O as the  
125 electron acceptor and the contribution of O<sub>2</sub> contamination to microbial growth was kept to minimal.  
126 The N<sub>2</sub>O concentration in the headspace of the reactor was monitored with a HP6890 Series gas  
127 chromatography fitted with an HP-PLOT/Q column and an electron capture detector (Agilent, Palo  
128 Alto, CA), with the injector, oven and detector temperatures set to 200, 85, and 250 °C, respectively.<sup>30</sup>  
129 The O<sub>2</sub> concentration in the fed-batch reactor was monitored with a FireSting-O<sub>2</sub> oxygen meter  
130 (Pyroscience, Aachen, Germany); however, due to the relatively high detection limit of the sensor (the  
131 gas phase concentration of ~0.1% v/v), complete absence of O<sub>2</sub> was not guaranteed.  
132  
133 The growth of bacterial population in the reactor was monitored with qPCR using TaqMan chemistry  
134 targeting the conserved region of eubacterial 16S rRNA genes. At each sampling time point, an 1.5-  
135 mL aliquot was collected from the aqueous phase of the reactor and DNA was extracted from the  
136 pellets using DNeasy Blood & Tissue Kit (Qiagen, Hilden, Germany) following the protocol provided  
137 by the manufacturer. Quantitative PCR was performed with the 1055f (5'-ATGGCTGTCGTCAGCT-  
138 3') / 1392r (5'-ACGGGCGGTGTGTAC-3') / Bac1115Probe (5'-CAACGAGCGCAACCC-3')

139 primer and probe set targeting a conserved region of bacterial 16S rRNA genes using a QuantStudio3  
140 platform (Thermo Fisher Scientific, Waltham, MA).<sup>31</sup> Incubation was halted when the population of  
141 the enrichment reached a plateau, as indicated by three consecutive measurements without increased  
142 gene counts. The reactor was dismantled and the aqueous phase was collected for microbial  
143 composition analysis. The hypervariable V6–8 region of the 16S rRNA gene was amplified with 926F:  
144 5'-AAACTYAAAKGAATTGRCGG-3' / 1392R: 5'-ACGGGCGGTGTGTRC-3' primer set and  
145 MiSeq sequencing of the amplicons was outsourced to Macrogen Inc. (Seoul, Korea). The raw  
146 sequence reads were deposited in the NCBI short reads archive (SRA) database (accession:  
147 PRJNA552413) and were processed using the QIIME pipeline v 1.9.1 (detailed computational method  
148 provided in the supplementary information).

149

#### 150 **Design of degenerate primers and probes for group-specific qPCR of *nosZ* genes**

151 The genera assigned to the OTUs with the relative abundances higher than 0.3% in any of the reactor  
152 microbial communities were selected. All *nosZ* gene sequences and corresponding translated NosZ  
153 amino acid sequences belonging to the organisms affiliated to these genera were extracted from the  
154 Uniprot ([www.uniprot.org](http://www.uniprot.org)) database (accessed in March 2017) (Table S1). The curated pools of  
155 *nosZ*/NosZ sequence data included, in total, 174 nucleotide sequences and the corresponding amino  
156 acid sequences from 14 distinct genera. Subsequently, a multiple sequence alignment was performed  
157 with these amino acid sequences, using MUSCLE algorithm with the parameters set to the default  
158 values.<sup>32</sup> The NosZ phylogenetic tree was constructed using the neighbor-joining method in MEGA  
159 7.0 with the bootstrap value set to 500.<sup>33</sup> The *nosZ* gene sequences were clustered into five groups  
160 (NosZG1-5) according to the positions of the corresponding NosZ sequences in the phylogenetic tree,  
161 which consisted of five phylogenetically distinct subbranches.

162

163 For each *nosZ* group, a primers and probe set was designed using the PriMux software to  
164 comprehensively and exclusively target the *nosZ* gene sequences within the group.<sup>34</sup> The parameters  
165 were modified from the default values to obtain the optimal candidate degenerate oligonucleotide  
166 sequences for qPCR (length: 18-24 bp, amplicon size: 80-400 bp, T<sub>m</sub>: 56-62°C for primers and 68 -

167 72°C for probes). Several candidate primers and probe sets were generated for each *nosZ* group,  
168 implementing the *min*, *max*, and *combo* algorithms of the Primux software. The performance of each  
169 candidate primers and probe set was predicted with *in silico* PCR performed with the simulate\_PCR  
170 software against all complete genome sequences of the organisms belonging to each of the five *nosZ*  
171 groups (Table S1).<sup>34, 35</sup> Coverage within the target *nosZ* group and mutual exclusivity across the  
172 groups were the two major criteria for assessment of the candidate primers and probe sets. The *in*  
173 *silico* PCR tests were also performed against the complete genomes of 50 bacterial strains lacking  
174 *nosZ* to preclude the possibility of unspecific amplification.

175

#### 176 **Construction of calibration curves for the designed primer and probe sets using model N<sub>2</sub>O** 177 **reducer strains**

178 A model organism from each group of the selected *nosZ* gene(s) was used for construction of the  
179 calibration curve. The selected model organisms were *Pseudomonas stutzeri* DCP-Ps1 (NosZG1),  
180 *Acidovorax soli* DSM25157 (NosZG2), *Flavobacterium aquatile* LMG4008 (NosZG3),  
181 *Ignavibacterium album* JCM16511 (NosZG4), and *Dechloromonas aromatica* RCB (NosZG5).  
182 *Acidovorax soli* DSM25157 and *F. aquatile* LMG4008 were acquired from Korean Collection for  
183 Type Cultures and *I. album* JCM16511 from Japanese Collection of Microorganisms. The axenic  
184 batch cultures of these organisms were prepared as previously described in the literature or using the  
185 media and incubation conditions specified by the distributors. The cells were harvested at OD<sub>600nm</sub> =  
186 0.1 and the *nosZ* gene(s) in the DNA extracted from the cell pellets were amplified using the designed  
187 primers. The calibration curve for each qPCR reaction was constructed using ten-fold serial dilutions  
188 of PCR<sup>®</sup> 2.1 vectors (Invitrogen, Carlsbad, CA) carrying the *nosZ* amplicons. A uniform thermocycle  
189 was used for the qPCR: 95°C for 10 min and 40 cycles of 95 °C for 30 s, 58 °C for 60 s, and 72 °C for  
190 60 s.

191

#### 192 **Group specific quantitative PCR targeting *nosZ* gene and transcripts in activated sludge** 193 **samples**

194 The group-specific quantification of the *nosZ* genes and transcripts in the activated sludge samples  
195 were performed with the designed primer and probe sets (Table 1) on a QuantStudio 3 real-time PCR  
196 instrument using TaqMan detection chemistry (FAM as the reporter and NFQ-MGB as the quencher).  
197 DNeasy Blood & Tissue Kit (QIAGEN) was used to extract DNA from the activated sludge samples.  
198 From the methanol-treated samples, RNA was extracted with RNeasy Mini Kit (Qiagen), purified  
199 with DNase I (Qiagen) and RNeasy MinElute Cleanup Kit (Qiagen), and reverse-transcribed with  
200 Superscript<sup>®</sup> III (Thermo Fisher Scientific), as described previously.<sup>36</sup> The luciferase control mRNA  
201 (Promega, Madison, WI, USA) was added as the internal standard to account for RNA loss during the  
202 process. Each 20- $\mu$ L qPCR reaction mix contained 10  $\mu$ L of 2X TaqMan master mix (Applied  
203 Biosystems, Foster city, CA, USA), 5  $\mu$ M each of the forward and reverse primers, 0.5  $\mu$ M of the  
204 probe, and 2  $\mu$ L of the DNA or cDNA. Calibration curves prepared with dilution series of the PCR  
205 amplicons were used to calculate the copy numbers of the targeted genes from the  $C_t$  values.  
206 Eubacterial 16S rRNA genes in the extracted DNA samples were quantified using the  
207 1055F/1392R/Bac115Probe set for quantification of total bacterial population in the activated sludge  
208 samples (Table S2). The copy numbers of the targeted *nosZ* genes in the wastewater samples were  
209 normalized with the 16S rRNA gene copy numbers to facilitate comparison with the relative  
210 abundances of the *nosZ* groups from the metagenomic analyses.

211

212 The PCR amplicons of the Daejeon1 sample amplified with NosZG1-5 primer sets were sequenced  
213 using Illumina Miseq platform (San Diego, CA) at the Center for Health Genomics and Informatics at  
214 University of Calgary. The raw sequence reads have been deposited in the SRA database (accession  
215 number: PRJNA552418). After quality trimming and merging of the paired-end sequences, the  
216 sequences without the probe-binding region were removed, and the remaining reads were clustered  
217 into OTUs with 0.97 cut-off using cd-hit-est v. 4.6.<sup>37</sup> The OTUs were annotated using blastx against  
218 the bacterial Refseq database downloaded in June, 2018, with the e value cut off set to  $10^{-3}$  and word  
219 size to 3 and no seg option selected,

220



221 **Computational quantification of *nosZ* genes from shotgun metagenomes of the activated sludge**  
222 **samples**

223 The DNA samples for shotgun metagenome sequencing were extracted with DNeasy PowerSoil Kit  
224 (Qiagen) from 50 mL each of the four activated sludge samples collected for validation of the qPCR  
225 assays. Sequencing of the metagenomic DNA was performed at Macrogen Inc., where HiSeq X Ten  
226 sequencing platform (Illumina, San Diego, CA) was used for generating 5-10 Gb of paired-end reads  
227 data with 150-bp read length. The raw sequence reads have been deposited in the NCBI short reads  
228 archive (SRA) database (accession numbers: PRJNA552406).

229

230 The raw reads were then processed using Trimmomatic v0.36 software with the parameters set to the  
231 default values.<sup>38</sup> The trimmed reads were translated *in silico* into amino acid sequences using all six  
232 possible reading frames and screened for clade I and II *nosZ* sequences using hidden Markov models  
233 (HMM). The two HMM algorithms for clade II *nosZ* were downloaded from the Fungene database  
234 (accessed in October 2016). As the HMM for clade I *nosZ* in the database had specificity issues, the  
235 HMM algorithm was constructed *de novo* using *hmmbuild* command of HMMER v3.1b1. The clade I  
236 *NosZ* sequences used to build the HMM were manually curated from the pool of *NosZ* sequences  
237 downloaded from the NCBI database (accessed in October 2016), to represent diverse subgroups  
238 within the clade (Table S3).<sup>8, 11</sup> The candidate partial *NosZ* sequences were extracted from the  
239 translated shotgun metagenome reads using the *hmmsearch* command of HMMER v3.1b1 with the e  
240 value cutoff set to  $10^{-5}$ . The nucleotide sequence reads corresponding to the extracted partial *NosZ*  
241 sequences (in separate bins for clade I and clade II *NosZ*) were assembled into contigs using  
242 metaSPAdes v3.12.0 with parameters set to default values.<sup>39</sup> The assembled contigs with lengths  
243 shorter than 200 bp were filtered out. The overlapping contigs appearing in both clade I and clade II  
244 *NosZ* bins were identified by clustering the two sets of contigs against each other with a nucleotide  
245 identity cutoff of 1.0. These overlapping contigs were manually called to the correct bin according to  
246 the BLASTX results. The trimmed sequence reads were then mapped onto the contigs in the *nosZ*  
247 bins using Bowtie2 v2.2.6, yielding sequence alignments for the contigs and the mapped reads. The  
248 alignment files were further processed using samtools v0.1.19, and the PCR duplicates were removed

249 using MarkDuplicates function of picard-tools v1.105.<sup>40</sup> The sequence coverages of the contigs were  
250 calculated using bedtools v2.17.0. The number of reads mapped on to the contigs were normalized  
251 with the lengths of the respective contigs. The contigs were assigned taxonomic classification using  
252 blastx, and distributed to the NosZG1-5 bins based on their taxonomic affiliations (Table S4). The  
253 contigs without matching sequence were binned as ‘other *nosZ* sequences’. The attempt to use 16S  
254 rRNA sequences extracted with Meta-RNA and assembled with EMIRGE as the template for  
255 mapping was not successful, as the coverage of the extracted 16S rRNA sequences turned out to be an  
256 order of magnitude lower than the *rpoB* coverage (Data not shown).<sup>41,42</sup> Thus, the sequence coverage  
257 of *rpoB* gene, a single-copy housekeeping gene, was used for normalization of the *nosZ* abundance  
258 data. The HMM algorithm for *rpoB* was downloaded from the Fungene database.

259

## 260 **Results**

### 261 **Active N<sub>2</sub>O reducers enriched in fed-batch incubation with varying N<sub>2</sub>O concentrations**

262 The microbial communities of the three N<sub>2</sub>O-reducing enrichments, each prepared with different N<sub>2</sub>O  
263 concentrations, were analyzed to identify active N<sub>2</sub>O-reducing groups of microorganisms (Table S5).  
264 Screening for operational taxonomic units (OTUs) with >0.3% abundance in any of the three  
265 enrichments yielded 69 OTUs assigned to 33 genera in total, and 14 of these genera were identified  
266 with phylogenetic subgroups harboring clade I or clade II *nosZ*. The OTUs belonging to these  
267 putatively *nosZ*-harboring genera amounted to 50.8% – 63.2% of the total microbial population in the  
268 enrichments. The abundances of the genera putatively harboring clade II *nosZ* were observed to be  
269 greater than those of the genera harboring clade I of *nosZ* (Table S5). In the enrichment incubated  
270 with 20 ppmv N<sub>2</sub>O, *Cloacibacterium* (18.9%), *Flavobacterium* (14.2%), and *Acidovorax* (13.5%)  
271 were identified as the dominant genera. *Dechloromonas* (17.3%) and *Flavobacterium* (15.8%) were  
272 the dominant genera in the 200 ppmv enrichment, and *Dechloromonas* was the predominant  
273 population in the enrichment incubated with 10,000 ppmv of N<sub>2</sub>O, constituting 46.0% of the total  
274 microbial population.

275

### 276 **Designing of the degenerate *nosZ* primer/probe sets**

277 With the 174 translated NosZ sequences affiliated to the 14 genera putatively harboring active N<sub>2</sub>O-  
278 reducing organisms identified in the activated sludge enrichments, a phylogenetic tree composed of  
279 five distinct branches (NosZG1 – NosZG5) was constructed (Figure S3). NosZG1 and NosZG2 were  
280 identified as clade I NosZ and NosZG3-NosZG5 as clade II NosZ. After the iterative process of  
281 designing candidate primers and probe sets and performing *in silico* PCR tests, the final sets of  
282 degenerate primers/probe sets were designed to comprehensively and exclusively target the five *nosZ*  
283 groups (Table 1). The *in-silico* PCR performed against 174 genomes from which the target *nosZ*  
284 sequences were extracted and 50 genomes without *nosZ* confirmed the high levels of coverage (57.3-  
285 100%) and complete exclusivity for all five degenerate primers/probe sets (Table 1). The qPCR  
286 calibration curves were constructed with the selected model organisms (Figure S4, Table S6), and  
287 despite the high levels of degeneracy (up to 110592), amplification efficiencies above 90% were  
288 attained for all five primer and probe sets after rigorous optimization process.

289

#### 290 **Cross-checking of the group-specific qPCR quantification of *nosZ* genes with shotgun** 291 **metagenome analyses**

292 The *nosZ* gene abundances in four distinct activated sludge samples were quantified using the newly  
293 designed qPCR assays, and the *nosZ* sequences extracted from the shotgun metagenomes of these  
294 same samples were quantitatively analyzed in parallel, for cross-checking of the qPCR results (Figure  
295 1). The qPCR results of the four activated sludge samples invariably showed the dominance of the  
296 clade II *nosZ* genes (NosZG3 and NosZG5) over clade I *nosZ* genes (NosZG1 and NosZG2), with at  
297 least five-fold higher copy numbers (Figure 2). The qPCR targeting the NosZG4 group failed to  
298 amplify the clade II *nosZ* belonging to this group. The NosZG4 primers/probe set was designed from  
299 a single complete genome (*Ignavibacterium album*) and six sequences from metagenome assembled  
300 genomes (MAGs), which may have been insufficient to cover the sequence divergence of this *nosZ*  
301 subgroup.

302

303 The distribution of the *nosZ* sequences extracted from the shotgun metagenomes (Table S7) were also  
304 severely biased towards clade II. The compositions of the *nosZ* genes exhibited high level of

305 similarity across the activated sludge samples. The calculated relative abundances of the two most  
306 abundant groups, NosZG3 and NosZG5, were relatively consistent across the samples, varying by less  
307 than 1.7-fold. The contributions of NosZG1 and NosZG2 to the total *nosZ* gene abundances were  
308 minor in all of the samples and largely variable. The fold differences between the samples with the  
309 highest relative abundance of NosZG1 and NosZG2 and those with the lowest abundance were 3.5  
310 and 2.3, respectively. The *nosZ* genes sorted as NosZG4 constituted <1.2% of the total *nosZ* genes  
311 grouped as NosZG1-NosZG5, suggesting that this *nosZ* group has less significant role in N<sub>2</sub>O  
312 reduction in activated sludge tanks than other analyzed groups.

313

314 As the qPCR data were normalized with the eubacterial 16S rRNA copy numbers and the  
315 metagenome-derived relative abundance data were normalized with the sequence coverages of the  
316 single-copy housekeeping gene *rpoB*, direct comparison of the outcomes was not possible.  
317 Theoretically, however, the ratios of the *nosZ/rpoB* (metagenome) to *nosZ/16S* (qPCR) could be used  
318 as indicators of reliability of the qPCR assays, with consistency in the ratios across the *nosZ* groups  
319 indicating high reliability. The *nosZ/rpoB*-to-*nosZ/16S* ratios were within a narrow range between 1.6  
320 and 2.4 for NosZG5 across the four activated sludge samples. For an unidentified reason, broad gaps  
321 between the NosZG1-3 qPCR and the metagenomics data were observed with the Daejeon1 sample.  
322 Excluding these results, the *nosZ/rpoB*-to-*nosZ/16S* ratio varied from 3.3 to 7.2 for NosZG3, and the  
323 *nosZ/rpoB*-to-*nosZ/16S* ratios of NosZG1 and NosZG2 ranged from 1.9 to 2.1 and from 1.9 to 9.2,  
324 respectively. The *nosZ/16S*-to-*nosZ/rpoB* ratios of 12 out of the 16 qPCR assays performed  
325 (excluding NosZG4) were within the range between 1.5 and 9.2, indicating that the group-specific  
326 qPCR assays enabled reliable quantification of *nosZ* genes.

327

328 The *nosZ* amplicons of the Daejeon1 sample, amplified with the newly-designed qPCR primers, were  
329 sequenced and analyzed to check whether the qPCR reactions were comprehensive and mutually  
330 exclusive (Figure 3). As the NosZG4 primers failed to amplify the targeted genes, NosZG4 was  
331 excluded from the downstream analysis. The *nosZ* genes of putative active N<sub>2</sub>O reducers captured by  
332 the NosZG1 and NosZG2 primer sets accounted for 54.2% of the entire pool of the clade I *nosZ* genes

333 extracted from the shotgun metagenome. The NosZG3 and NosZG5 primer sets captured 63.4% of the  
334 clade II *nosZ* genes recovered from the metagenome (Figure S5). No amplification outside the  
335 targeted group occurred for any of the primers, confirming the complete mutual exclusivity of these  
336 primers. Each of the qPCR assays were comprehensive within its target groups, as analyzed *nosZ*  
337 amplicon sequences covered all genera originally targeted by each primer and probe set.

338

339 Overall, the OTUs identified to be abundant from sequence analyses of the PCR amplicons coincided  
340 with the dominant *nosZ* OTUs from shotgun metagenome analysis. The OTUs affiliated to  
341 *Rhodobacter capsulatus*, Rhodobacteraceae bacterium QY30, *Hyphomicrobium denitrificans*, and  
342 *Bradyrhizobium* sp. were the dominant OTUs among the OTUs NosZG1 amplicons. The two most  
343 abundant *nosZ* OTUs among the NosZG3 amplicons were affiliated to *Flavobacterium columnare* and  
344 *Niastella koreensis*, which were also the most abundant *nosZ* taxa according to the metagenome  
345 analyses. Discrepancies between the amplicon sequencing data and the shotgun metagenome data  
346 were observed for NosZG2 and NosZG5 to some degree. The OTUs assigned to the genus *Thauera*  
347 and *Ruvrivorax gelatinosus* were the dominant among NosZG2, constituting 50.4% of the amplicons,  
348 but together constituted only 2.2% of the metagenome-derived *nosZ* sequences belonging to this  
349 group. Instead, an OTU affiliated to *Ramlibacter tataouinensis*, closely related to *R. gelatinosus*, was  
350 recovered in high relative abundance (15.4%) in the metagenome-derived *nosZ* pool. Likewise, the  
351 low relative abundance of the OTUs affiliated to *Dechloromonas aromatica* (0.2%) in the NosZG5  
352 amplicons was coupled to the high relative abundance of the *nosZ* OTU affiliated to the *Azospira*  
353 *oryzae* (54.6%) with >96% translated amino acid identity within the amplified region. Thus, the  
354 observed discrepancy may be due to ambiguous OTU assignment among the closely related taxa.

355

356 The TaqMan-based qPCR assays were also compared with the most frequently used qPCR assays for  
357 clade I and clade II *nosZ* using SYBR green detection chemistry (Figure S6). Despite the low  
358 amplification efficiency (79.3%), the abundances of clade I *nosZ*, as determined with the SYBR  
359 Green assays, were relatively consistent with the cumulative abundances of NosZG1 and NosZG2  
360 determined with the TaqMan qPCR assays, except for Daejeon1 sample, where the SYBR Green

361 qPCR yielded 87 times lower copy numbers than the TaqMan qPCR. The SYBR Green qPCR with  
362 nosZII-F–nosZII-R primer set, with a subpar amplification efficiency of 61.9%, underestimated the  
363 clade II *nosZ* copy numbers by several orders of magnitudes for three of the four analyzed samples,  
364 with the largest difference ( $1.8 \times 10^3$ -fold) observed with the Daejeon1 sample. The importance of the  
365 clade II *nosZ* among the N<sub>2</sub>O-reducing microbial community in these activated sludge samples would  
366 have gone unnoticed due to this underestimation, if the conventional qPCR assays were used as the  
367 sole means of *nosZ* quantification.

368

### 369 **Quantitative analyses of *nosZ* genes and transcripts in activated sludge microbiomes**

370 With the new group-specific *nosZ* primers, the activated sludge microbiomes from anoxic tanks of six  
371 A2O WWTPs apart from those used for development and cross-checking processes were analyzed for  
372 the *nosZ* gene and transcript abundances (Figure 4). As observed with the samples from Daejeon1,  
373 Daejeon2, Gwangju, and Gapyeong, the clade II *nosZ* (amplified with NosZG3 and NosZG5), were at  
374 least three-fold more abundant than the clade I *nosZ* (amplified with NosZG1 and NosZG2) in terms  
375 of gene abundance. The *Dechloromonas*-like *nosZ* genes (NosZG5) was the most abundant *nosZ*  
376 group in all samples but from Busan WWTP, where the abundance of *Flavobacterium*-like *nosZ*  
377 genes (NosZG3) was statistically similar to this group. The transcript profiles further highlighted the  
378 significance of clade II *nosZ* in activated sludge microbiomes. Due to the lower gene abundance and  
379 generally low level of transcription observed for clade I *nosZ* (transcript-to-gene ratios of <1.0 for  
380 both NosZG1 and NosZG2 in five out of six samples), transcription of the clade I *nosZ* was at least an  
381 order of magnitude lower than that of the clade II *nosZ* in all samples. The *Pseudomonas*-like *nosZ*  
382 (NosZG1) had remarkably low transcription level (transcript-to-gene ratios of <0.01) in all samples  
383 but from Busan WWTP, suggesting irrelevance of this *nosZ* group as an N<sub>2</sub>O sink in the activated  
384 sludge tanks. The relative importance of NosZG3 and NosZG5 is difficult to fathom, as *nosZ*  
385 transcripts targeted by NosZG3 were significantly more abundant in the sample from Busan WWTP  
386 ( $p < 0.05$ ), while NosZG5 was significantly more abundant in the samples from three other WWTPs  
387 ( $p < 0.05$ ).

388

389 **Discussion**

390 Quantification of the functional genes encoding the nitrogen cycle enzymes (e.g., bacterial/archaeal  
391 *amoA*, comammox *amoA*, *nrfA*, and clade I and II *nosZ*) has been used in increasing number of  
392 studies across diverse disciplines of environmental sciences and engineering, as predictors of nitrogen  
393 cycling activity in diverse soil and aquatic environments.<sup>43-46</sup> Despite the frequent use of qPCR in  
394 determining the potential N<sub>2</sub>O-reducing populations, i.e., clade I and clade II *nosZ*-possessing  
395 microorganisms, the predictability of qPCR quantification has rarely been scrutinized in the previous  
396 studies. The new group-specific qPCR assays exhibited definite advantages over these frequently used  
397 primers. Although the targets were limited to the groups of *nosZ*-possessing organisms enriched with  
398 N<sub>2</sub>O in *ex situ* cultures, the copy numbers obtained were, in many cases, orders of magnitudes larger  
399 than those measured using previous primer sets. The diversity of the sequences recovered in the  
400 amplicon sequence indicates the exhaustive coverages of the qPCR assays developed in this study  
401 within the targeted groups. Most of the major *nosZ* OTUs (>1% in relative abundance) recovered in  
402 metagenome-based *nosZ* profiling of the examined activated sludge samples were amplified with  
403 exactly one of the four primer sets, thus confirming the absolute mutual exclusiveness of the  
404 primers/probe sets. Any methods for quantification of functional genes are prone to error, and the  
405 *nosZ* qPCR methods developed here also have certain deficiencies, including inability to amplify *nosZ*  
406 genes affiliated to relatively abundant *Iganvibacterium* spp. In designing the group-specific primers, a  
407 trade-off between coverage and mutual exclusivity was inevitable, which could have been the cause  
408 of modest discrepancy with the metagenome data. Nevertheless, despite these drawbacks, there is  
409 little doubt that the qPCR assays developed in this study are the most reliable tools for real-time  
410 quantification of the environmentally significant *nosZ* genes available to date.

411

412 The clade II *nosZ*-possessing organisms of the *Flavobacterium* (amplified with NosZG3),  
413 *Dechloromonas*, and *Azospira* (amplified with NosZG5) genera have previously been characterized  
414 with high-affinity reduction of N<sub>2</sub>O.<sup>13, 14</sup> The whole-cell half-saturation constants as low as 0.324 μM  
415 has been reported for these groups of N<sub>2</sub>O reducers. The *nosZ* gene and transcript pools of all six of  
416 the activated sludge samples were dominated by these clade II *nosZ* (targeted by NosZG3 and



417 NosZG5). This observation, along with the high transcript-to-gene ratios support the previous  
418 hypothesis that the clade II *nosZ*, with higher affinity to N<sub>2</sub>O, may have consequential role in reducing  
419 N<sub>2</sub>O emissions from soil and aquatic environments, including the activated sludge tanks.<sup>15, 47</sup> The low  
420 transcript-to-gene ratios of the clade I *nosZ* (<0.1 in five out of six samples) targeted by NosZG1 and  
421 NosZG2 were also notable in the *nosZ* transcript profiles. The organisms possessing clade I *nosZ*  
422 genes, being almost exclusively denitrifiers, may favor upstream steps of denitrification reaction in  
423 the anoxic activated sludge tanks, where NO<sub>3</sub><sup>-</sup> and/or NO<sub>2</sub><sup>-</sup> are constantly available at millimolar  
424 concentrations and N<sub>2</sub>O is immediately consumed by their high-affinity cohabitants, which may  
425 prefer N<sub>2</sub>O to NO<sub>3</sub><sup>-</sup> or NO<sub>2</sub><sup>-</sup>. More physiological evidences are warranted in the future research,  
426 however, to verify whether such hypothetical ‘division of labor’ really exists, as any further  
427 extrapolation from the *nosZ* transcription data alone would be an over-interpretation.

428

429 The major *nosZ*-possessing organisms identified in the qPCR and metagenomic analyses differ greatly  
430 from the major *nosZ*-possessing populations of the agricultural soils analyzed previously with shotgun  
431 metagenome sequencing.<sup>48</sup> None of the six most abundant *nosZ* phylogenetic groups in the Havana  
432 and Urbana agricultural research site soils (the *nosZ* genes affiliated to *Anaeromyxobacter*, *Opitutus*,  
433 *Hydrogenobacter*, *Ignavibacterium*, *Dyedobacter*, and *Gemmatimonas*) was identified as a major  
434 population in any of the activated sludge samples examined in this study. Neither were they enriched  
435 with N<sub>2</sub>O to high relative abundance (e.g., >1%) in the fed-batch reactor. Of the organisms affiliated  
436 to these genera, *Anaeromyxobacter dehalogenans* and *Gemmatimonas aurentiaca* have been  
437 confirmed of N<sub>2</sub>O reduction activity; however, the N<sub>2</sub>O reduction rates measured *in vitro* were orders  
438 of magnitudes lower for these organisms than other examined N<sub>2</sub>O-reducing organisms throughout  
439 the entire range of N<sub>2</sub>O concentration, and *G. aurantiaca* lacked the capability to utilize N<sub>2</sub>O as the  
440 growth substrate.<sup>11, 13, 30</sup> The differences in the compositions of the *nosZ*-possessing populations may  
441 be attributed to the inherent difference in the rates of the biochemical turnover processes in WWTP  
442 activated sludges and soils. Rapid nitrogen cycling reactions take place on a constant basis in WWTPs,  
443 while the time scale of the biogeochemical processes in agricultural soils is orders of magnitude  
444 longer and often, nitrogen supply provided through fertilization and plant exudation is sparse and



445 sporadic.<sup>49</sup> Besides, upland agricultural soils are often well-aerated and thus, the capability of N<sub>2</sub>O  
446 utilization would not provide specific benefits to the *nosZ*-harboring organisms at ordinary dry  
447 conditions.<sup>50</sup> In fact, incubation of soil microbial consortium with N<sub>2</sub>O in the same fed-batch  
448 cultivation resulted in enrichment of the same organismal groups as those observed in the activated  
449 sludge enrichments (e.g., *Pseudomonas*, *Flavobacterium*, *Acidovorax*, and *Chryseobacterium*),  
450 suggesting that under occasions of pulse stimulation of denitrification and N<sub>2</sub>O reduction, e.g.,  
451 flooding events immediately following fertilization, these organisms may become the relevant N<sub>2</sub>O  
452 sinks in soils, as well (Table S8). Besides, none of the 14 *nosZ*-carrying genera enriched with N<sub>2</sub>O in  
453 this study from either the activated sludge and soil belonged to the taxa identified as non-denitrifying  
454 N<sub>2</sub>O reducers suggesting that the abundance of non-denitrifier taxa, *per se*, may not be a measure of  
455 the N<sub>2</sub>O sink capability, as previously proposed.

456

#### 457 **Acknowledgements**

458 This work was financially supported by “the R&D Center for reduction of Non-CO<sub>2</sub> Greenhouse  
459 Gases (Grant No. 2017002420002)” funded by Korea Ministry of Environment (MOE).

460

#### 461 **Reference**

462 (1) Ciais, P.; Sabine, C.; Bala, G.; Bopp, L.; Brovkin, V.; Canadell, J.; Chhabra, A.;  
463 DeFries, R.; Galloway, J.; Heimann, M.; Jones, C.; Le Quere, C.; Myneni, R. B.; Piao,  
464 S.; Thornton, P., Carbon and other biogeochemical cycles. In *Climate change 2013:  
465 The physical science basis. Contribution of working group I to the fifth assessment  
466 report of the Intergovernmental Panel on Climate Change*, Stocker, T. F.; Qin, D.;  
467 Plattner, G.-K.; Tignor, M.; Allen, S. K.; Boschung, J.; Nauels, A.; Xia, Y.; Bex, V.;  
468 Midgley, P. M., Eds. Cambridge University Press: Cambridge, United Kingdom, New  
469 York, NY, USA, 2013; pp 465-570. [http://www.ipcc.ch/pdf/assessment-  
470 report/ar5/wg1/WG1AR5\\_Chapter06\\_FINAL.pdf](http://www.ipcc.ch/pdf/assessment-report/ar5/wg1/WG1AR5_Chapter06_FINAL.pdf)

- 471 (2) Ravishankara, A. R.; Daniel, J. S.; Portmann, R. W. Nitrous oxide (N<sub>2</sub>O): the dominant  
472 ozone-depleting substance emitted in the 21<sup>st</sup> century. *Science* **2009**, *326*, (5949), 123-  
473 125.
- 474 (3) Portmann, R. W.; Daniel, J. S.; Ravishankara, A. R. Stratospheric ozone depletion due  
475 to nitrous oxide: influences of other gases. *Phil. Trans. R. Soc. B* **2012**, *367*, (1593),  
476 1256-1264.
- 477 (4) Yoon, S.; Song, B.; Phillips, R. L.; Chang, J.; Song, M. J. Ecological and physiological  
478 implications of nitrogen oxide reduction pathways on greenhouse gas emissions in  
479 agroecosystems. *FEMS Microbiol. Ecol.* **2019**, *95*, (6), fiz066.
- 480 (5) Law, Y.; Ye, L.; Pan, Y.; Yuan, Z. Nitrous oxide emissions from wastewater treatment  
481 processes. *Phil. Trans. R. Soc. B* **2012**, *367*, (1593), 1265-1277.
- 482 (6) Thomson, A. J.; Giannopoulos, G.; Pretty, J.; Baggs, E. M.; Richardson, D. J. *Philos*  
483 *Trans Royal Soc B* **2012**, *367*, (1593), 1157-1168.
- 484 (7) Frutos, O. D.; Quijano, G.; Aizpuru, A.; Muñoz, R. A state-of-the-art review on nitrous  
485 oxide control from waste treatment and industrial sources. *Biotechnol. Adv.* **2018**, *36*,  
486 (4), 1025-1037.
- 487 (8) Hallin, S.; Philippot, L.; Löffler, F. E.; Sanford, R. A.; Jones, C. M. Genomics and  
488 ecology of novel N<sub>2</sub>O-reducing microorganisms. *Trends Microbiol.* **2017**, *26*, (1), 43-  
489 55.
- 490 (9) Suenaga, T.; Hori, T.; Riya, S.; Hosomi, M.; Smets, B. F.; Terada, A. Enrichment,  
491 isolation, and characterization of high-affinity N<sub>2</sub>O-reducing bacteria in a gas-  
492 permeable membrane reactor. *Environ. Sci. Technol.* **2019**, *in press*; DOI:  
493 10.1021/acs.est.9b02237
- 494 (10) Zumft, W. G. Cell biology and molecular basis of denitrification. *Microbiol. Mol. Biol.*  
495 *Rev.* **1997**, *61*, (4), 533-616.

- 496 (11) Sanford, R. A.; Wagner, D. D.; Wu, Q.; Chee-Sanford, J. C.; Thomas, S. H.; Cruz-  
497 García, C.; Rodríguez, G.; Massol-Deyá; Krishnani, K. K.; Ritalahti, K. M.; Nissen, S.;  
498 Konstantinidis, K. T.; Löffler, F. E. Unexpected nondenitrifier nitrous oxide reductase  
499 gene diversity and abundance in soils. *Proc. Natl Acad Sci* **2012**, *109*, (48), 19709-  
500 19714.
- 501 (12) Conthe, M.; Wittorf, L.; Kuenen, J. G.; Kleerebezem, R.; van Loosdrecht, M. C. M.;  
502 Hallin, S. Life on N<sub>2</sub>O: deciphering the ecophysiology of N<sub>2</sub>O respiring bacterial  
503 communities in a continuous culture. *ISME J.* **2018**, *12*, (4), 1142-1153.
- 504 (13) Yoon, S.; Nissen, S.; Park, D.; Sanford, R. A.; Löffler, F. E. Nitrous oxide reduction  
505 kinetics distinguish bacteria harboring clade I versus clade II NosZ. *Appl. Environ.*  
506 *Microbiol.* **2016**, *82*, (13),3793-3800.
- 507 (14) Suenaga, T.; Riya, S.; Hosomi, M.; Terada, A. Biokinetic characterization and activities  
508 of N<sub>2</sub>O-reducing bacteria in response to various oxygen levels. *Front. Microbiol.* **2018**,  
509 *9*, 697.
- 510 (15) Jones, C. M.; Spor, A.; Brennan, F. P.; Breuil, M.-C.; Bru, D.; Lemanceau, P.; Griffiths,  
511 B.; Hallin, S.; Philippot, L. Recently identified microbial guild mediates soil N<sub>2</sub>O sink  
512 capacity. *Nat. Clim. Change* **2014**, *4*, 801-805.
- 513 (16) Domeignoz-Horta, L. A.; Spor, A.; Bru, D.; Breuil, M.-C.; Bizouard, F.; Leonard, J.;  
514 Philippot, L. The diversity of the N<sub>2</sub>O reducers matters for the N<sub>2</sub>O:N<sub>2</sub> denitrification  
515 end-product ratio across an annual and a perennial cropping system. *Front. Microbiol.*  
516 **2015**, *6*, 971
- 517 (17) Yoon, H.; Song, M. J.; Yoon, S. Design and feasibility analysis of a self-sustaining  
518 biofiltration system for removal of low concentration N<sub>2</sub>O emitted from wastewater  
519 treatment plants. *Environ. Sci. Technol.* **2017**, *51*, (18), 10736-10745.

- 520 (18) Yoon, H.; Song, M. J.; Kim, D. D.; Sabba, F.; Yoon, S. A serial biofiltration system for  
521 effective removal of low-concentration nitrous oxide in oxic gas streams: mathematical  
522 modeling of reactor performance and experimental validation. *Environ. Sci. Technol.*  
523 **2019**, *53*, (4), 2063-2074.
- 524 (19) Paranychianakis, N. V.; Tsiknia, M.; Kalogerakis, N. Pathways regulating the removal  
525 of nitrogen in planted and unplanted subsurface flow constructed wetlands. *Water Res.*  
526 **2016**, *102*, 321-329.
- 527 (20) Conthe, M.; Kuenen, J. G.; Kleerebezem, R.; van Loosdrecht, M. C. M. Exploring  
528 microbial N<sub>2</sub>O reduction: a continuous enrichment in nitrogen free medium. *Environ.*  
529 *Microbiol. Rep.* **2018**, *10*, (1), 102-107.
- 530 (21) Boonnorat, J.; Techkarnjanaruk, S.; Honda, R.; Ghimire, A.; Angthong, S.; Rojviroon,  
531 T.; Phanwilai, S. Enhanced micropollutant biodegradation and assessment of nitrous  
532 oxide concentration reduction in wastewater treated by acclimatized sludge  
533 bioaugmentation. *Sci. Tot. Environ.* **2018**, *637*, 771-779.
- 534 (22) Song, K.; Suenaga, T.; Harper, W. F.; Hori, T.; Riya, S.; Hosomi, M.; Terada, A.  
535 Effects of aeration and internal recycle flow on nitrous oxide emissions from a  
536 modified Ludzak–Ettinger process fed with glycerol. *Environ. Sci. Pollut. Res.* **2015**,  
537 *22*, (24), 19562-19570.
- 538 (23) Vieira, A.; Galinha, C. F.; Oehmen, A.; Carvalho, G. The link between nitrous oxide  
539 emissions, microbial community profile and function from three full-scale WWTPs. *Sci.*  
540 *Tot. Environ.* **2019**, *651*, 2460-2472.
- 541 (24) Henry, S.; Bru, D.; Stres, B.; Hallet, S.; Philippot, L. Quantitative detection of the *nosZ*  
542 gene, encoding nitrous oxide reductase, and comparison of the abundances of 16S  
543 rRNA, *narG*, *nirK*, and *nosZ* genes in soils. *Appl. Environ. Microbiol.* **2006**, *72*, (8),  
544 5181-5189.

- 545 (25) Jones, C. M.; Graf, D. R.; Bru, D.; Philippot, L.; Hallin, S. The unaccounted yet  
546 abundant nitrous oxide-reducing microbial community: a potential nitrous oxide sink.  
547 *ISME J.* **2013**, 7, (2), 417-426.
- 548 (26) Di, H. J.; Cameron, K. C.; Podolyan, A.; Robinson, A. Effect of soil moisture status  
549 and a nitrification inhibitor, dicyandiamide, on ammonia oxidizer and denitrifier growth  
550 and nitrous oxide emissions in a grassland soil. *Soil Biol. Biochem.* **2014**, 73, 59-68.
- 551 (27) Stoliker, D. L.; Repert, D. A.; Smith, R. L.; Song, B.; LeBlanc, D. R.; McCobb, T. D.;  
552 Conaway, C. H.; Hyun, S. P.; Koh, D.-C.; Moon, H. S. Hydrologic controls on nitrogen  
553 cycling processes and functional gene abundance in sediments of a groundwater flow-  
554 through lake. *Environ. Sci. Technol.* **2016**, 50, (7), 3649-3657.
- 555 (28) Binder, B. J.; Liu, Y. C., Growth rate regulation of rRNA content of a marine  
556 *Synechococcus* (Cyanobacterium) strain. *Appl. Environ. Microbiol.* **1998**, 64, (9), 3346-  
557 3351.
- 558 (29) Yoon, S.; Sanford, R. A.; Löffler, F. E., *Shewanella* spp. use acetate as an electron  
559 donor for denitrification but not ferric iron or fumarate reduction. *Appl. Environ.*  
560 *Microbiol.* **2013**, 79, (8), 2818-2822.
- 561 (30) Park, D.; Kim, H.; Yoon, S. Nitrous oxide reduction by an obligate aerobic bacterium  
562 *Gemmatimonas aurantiaca* strain T-27. *Appl. Environ. Microbiol.* **2017**, 83, (12),  
563 e00502-17.
- 564 (31) Ritalahti, K. M.; Amos, B. K.; Sung, Y.; Wu, Q.; Koenigsberg, S. S.; Löffler, F. E.  
565 Quantitative PCR targeting 16S rRNA and reductive dehalogenase genes  
566 simultaneously monitors multiple *Dehalococcoides* strains. *Appl. Environ. Microbiol.*  
567 **2006**, 72, (4), 2765-2774.
- 568 (32) Edgar, R. C. MUSCLE: multiple sequence alignment with high accuracy and high  
569 throughput. *Nucleic Acids Res.* **2004**, 32, (5), 1792-1797.

- 570 (33) Kumar, S.; Stecher, G.; Tamura, K. MEGA7: Molecular Evolutionary Genetics  
571 Analysis version 7.0 for bigger datasets. *Mol. Biol. Evol.* **2016**, *33*, (7), 1870-1874.
- 572 (34) Hysom, D. A.; Naraghi-Arani, P.; Elsheikh, M.; Carrillo, A. C.; Williams, P. L.;  
573 Gardner, S. N. Skip the alignment: degenerate, multiplex primer and probe design using  
574 K-mer matching instead of alignments. *PloS One* **2012**, *7*, (4), e34560.
- 575 (35) Gardner, S. N.; Slezak, T. J. B. B. Simulate\_PCR for amplicon prediction and  
576 annotation from multiplex, degenerate primers and probes. *BMC Bioinformatics* **2014**,  
577 *15*, (1), 237.
- 578 (36) Yoon, S.; Cruz-Garcia, C.; Sanford, R.; Ritalahti, K. M.; Löffler, F. E. Denitrification  
579 versus respiratory ammonification: environmental controls of two competing  
580 dissimilatory  $\text{NO}_3^-/\text{NO}_2^-$  reduction pathways in *Shewanella loihica* strain PV-4. *ISME*  
581 *J.* **2015**, *9*, (5), 1093-1104.
- 582 (37) Li, W.; Godzik, A. Cd-hit: a fast program for clustering and comparing large sets of  
583 protein or nucleotide sequences. *Bioinformatics* **2006**, *22*, (13), 1658-1659.
- 584 (38) Bolger, A. M.; Lohse, M.; Usadel, B. Trimmomatic: a flexible trimmer for Illumina  
585 sequence data. *Bioinformatics* **2014**, *30*, (15), 2114-2120.
- 586 (39) Nurk, S.; Meleshko, D.; Korobeynikov, A.; Pevzner, P. A. metaSPAdes: a new  
587 versatile metagenomic assembler. *Genome Res.* **2017**, *27*, (5), 824-834.
- 588 (40) Li, H.; Handsaker, B.; Wysoker, A.; Fennell, T.; Ruan, J.; Homer, N.; Marth, G.;  
589 Abecasis, G.; Durbin, R. The sequence alignment/map format and SAMtools.  
590 *Bioinformatics* **2009**, *25*, (16), 2078-2079.
- 591 (41) Miller, C. S.; Baker, B. J.; Thomas, B. C.; Singer, S. W.; Banfield, J. F. EMIRGE:  
592 reconstruction of full-length ribosomal genes from microbial community short read  
593 sequencing data. *Genome Biol.* **2011**, *12*, (5), R44.

- 594 (42) Huang, Y.; Gilna, P.; Li, W. Identification of ribosomal RNA genes in metagenomic  
595 fragments. *Bioinformatics* **2009**, *25*, (10), 1338-1340.
- 596 (43) Pjevac, P.; Schaubberger, C.; Poghosyan, L.; Herbold, C. W.; van Kessel, M. A. H. J.;  
597 Daebeler, A.; Steinberger, M.; Jetten, M. S. M.; Lücker, S.; Wagner, M.; Daims, H.  
598 *amoA*-targeted polymerase chain reaction primers for the specific detection and  
599 quantification of comammox *Nitrospira* in the environment. *Front. Microbiol.* **2017**, *8*,  
600 1508.
- 601 (44) Meinhardt, K. A.; Bertagnolli, A.; Pannu, M. W.; Strand, S. E.; Brown, S. L.; Stahl, D.  
602 A. Evaluation of revised polymerase chain reaction primers for more inclusive  
603 quantification of ammonia-oxidizing archaea and bacteria. *Environ. Microbiol. Rep.*  
604 **2015**, *7*, (2), 354-363.
- 605 (45) Ma, Y.; Zilles, J. L.; Kent, A. D. An evaluation of primers for detecting denitrifiers via  
606 their functional genes. *Environ Microbiol* **2019**, *21*, (4), 1196-1210.
- 607 (46) Chen, X.; Peltier, E.; Sturm, B. S. M.; Young, C. B. Nitrogen removal and nitrifying  
608 and denitrifying bacteria quantification in a stormwater bioretention system. *Water Res.*  
609 **2013**, *47*, (4), 1691-1700.
- 610 (47) Conthe, M.; Wittorf, L.; Kuenen, J. G.; Kleerebezem, R.; Hallin, S.; van Loosdrecht, M.  
611 C. M. Growth yield and selection of *nosZ* clade II types in a continuous enrichment  
612 culture of N<sub>2</sub>O respiring bacteria. *Environ. Microbiol. Rep.* **2018**, *10*, (3), 239-244.
- 613 (48) Orellana, L. H.; Rodriguez-R, L. M.; Higgins, S.; Chee-Sanford, J. C.; Sanford, R. A.;  
614 Ritalahti, K. M.; Löffler, F. E.; Konstantinidis, K. T. Detecting nitrous oxide reductase  
615 (*nosZ*) genes in soil metagenomes: method development and implications for the  
616 nitrogen cycle. *mBio* **2014**, *5*, (3), e01193-14.
- 617 (49) Cassman, K. G.; Dobermann, A.; Walters, D. T. Agroecosystems, nitrogen-use  
618 efficiency, and nitrogen management. *Ambio* **2002**, *31*, (2), 132-140.

619 (50) Aulakh, M. S.; Khera, T. S.; Doran, J. W. Mineralization and denitrification in upland,  
 620 nearly saturated and flooded subtropical soil. Effect of nitrate and ammoniacal  
 621 nitrogen. *Biol. Fert. Soils* **2000**, *31*, (2), 162-167.

622  
 623  
 624  
 625  
 626

627 **Figures**

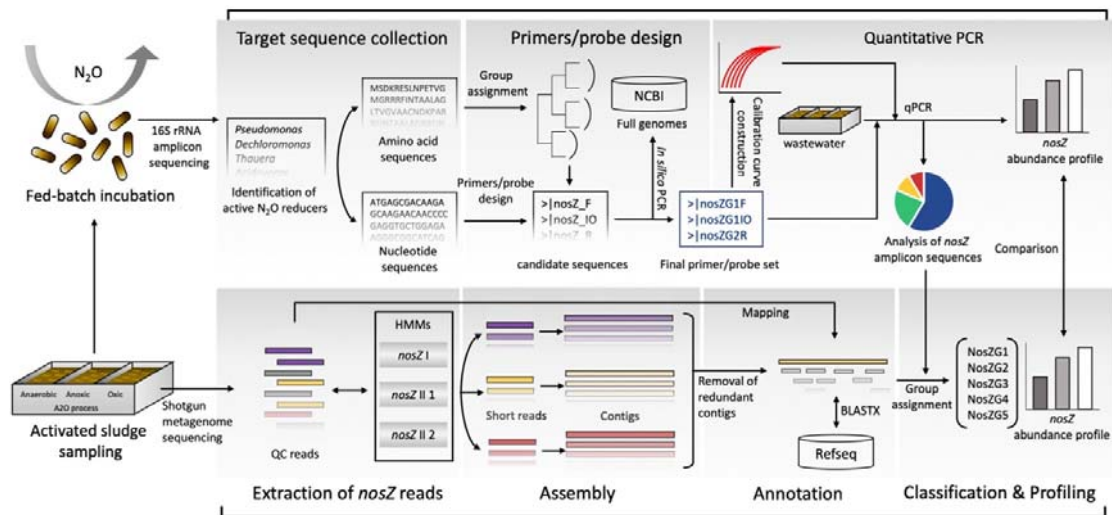

628

629 **Figure 1.** Flow chart for designing of the group-specific *nosZ* primer/probe sets and cross-  
 630 validation with *nosZ* sequence data extracted from shotgun metagenome data



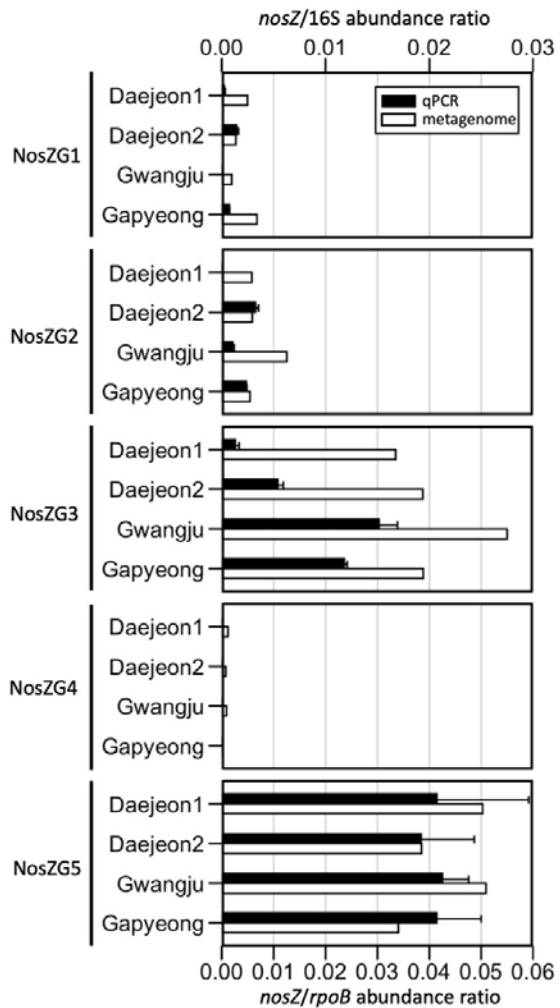

631

632 **Figure 2.** The relative abundances of NosZG1-5 *nosZ* genes as quantified using qPCR and  
633 metagenome analysis. The *nosZ* copy numbers from the qPCR assays were normalized with  
634 the copy numbers of eubacterial 16S rRNA genes. The coverages of *nosZ* genes in the  
635 metagenome data were normalized with the coverages of *rpoB* genes. The presented qPCR  
636 quantification data are the averages of triplicate samples processed separately through  
637 extraction and qPCR procedures, with the error bars representing their standard deviations.

638

639

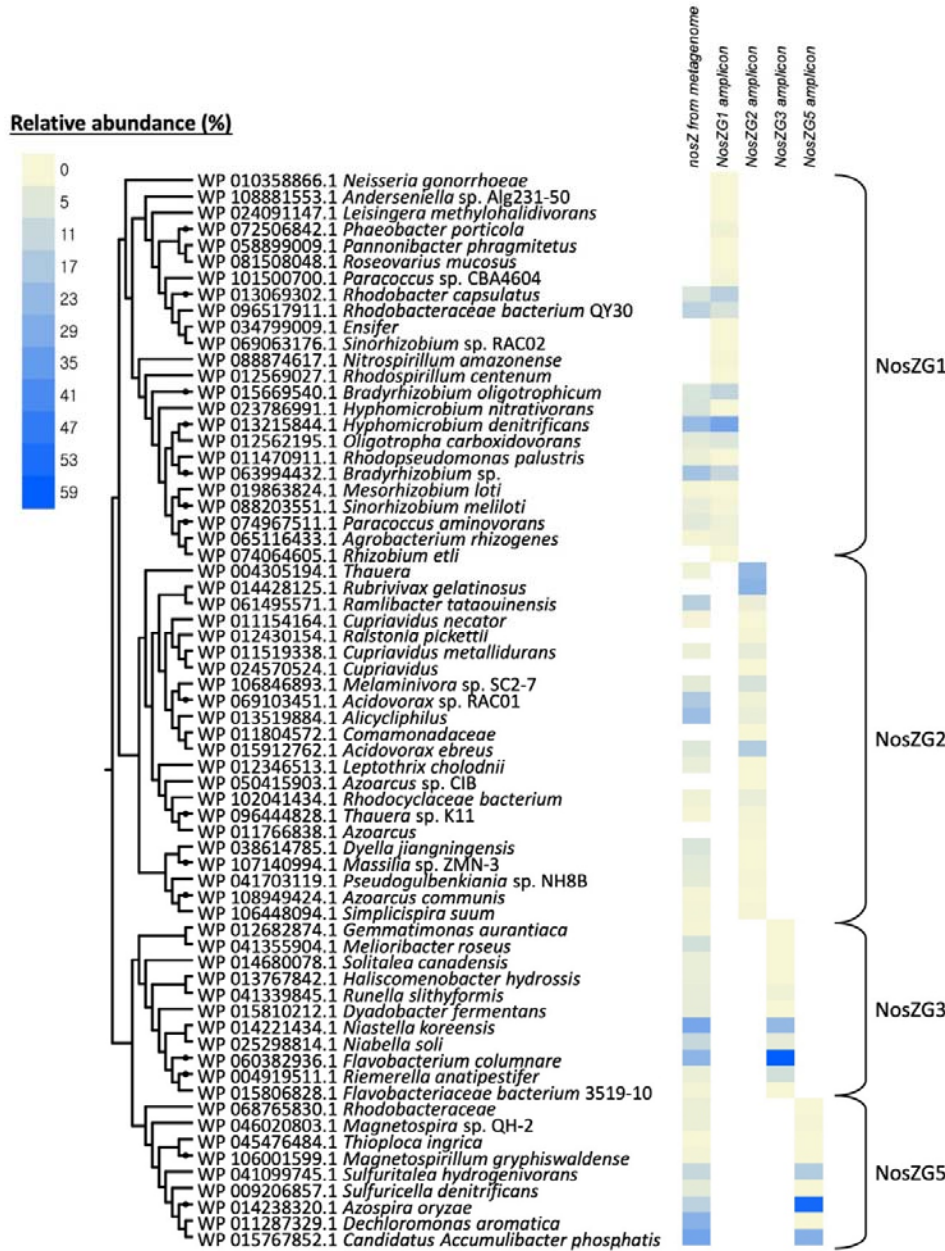

640

641 **Figure 3.** The phylogenetic tree constructed with the reference *nosZ* sequences of the taxa  
 642 matching OTUs generated from the partial *nosZ* sequences amplified with NosZG1-5 primers.  
 643 The phylogenetic tree was generated using neighbor-joining method with 500 bootstrap  
 644 replications. The heatmap shows the relative abundances of the OTUs within each *nosZ*  
 645 group, computed from the amplicon sequencing data and the *nosZ* sequence data extracted  
 646 from the metagenome

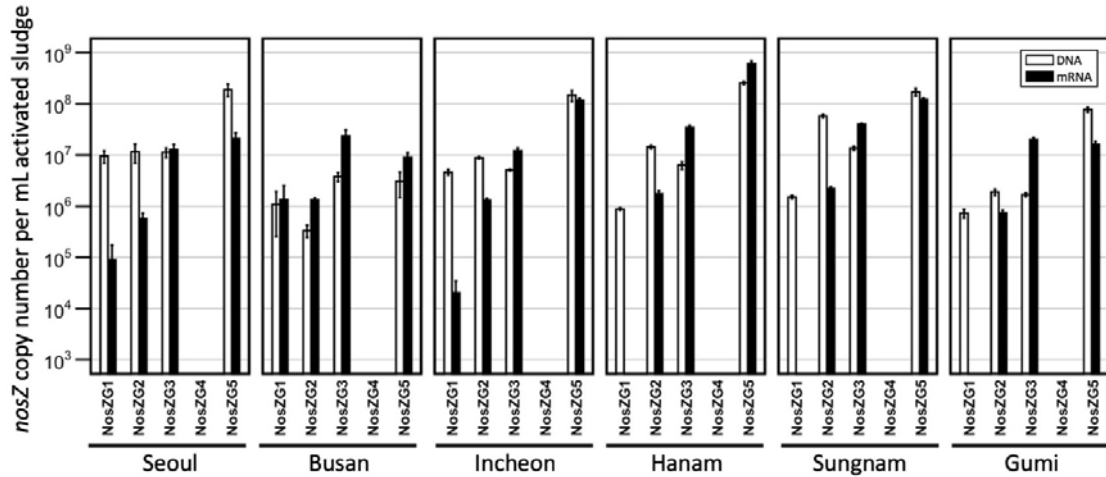

647

648 **Figure 4.** The copy numbers of NosZG1-5 *nosZ* genes and transcripts in activated sludge  
649 samples collected from anoxic tanks of six activated sludge-type WWTPs in Korea, as  
650 quantified using the group-specific *nosZ* qPCR developed in this study. The presented data  
651 are the averages of triplicate samples processed separately through extraction, purification  
652 and reverse transcription (for analyses of transcripts), and qPCR procedures, with the error  
653 bars representing their standard deviations.

654

655

656

657

658

659

660

661

662

663

664

665

666 Table 1. The primers/probe sets developed in this study for group-specific quantification of  
 667 *nosZ* genes

668

| Targeted group | Primers / Probe | Sequence (5' → 3')                              | Degeneracy | Coverage         | Efficiency (%) |
|----------------|-----------------|-------------------------------------------------|------------|------------------|----------------|
| NosZG1         | NosZG1F         | AAG GTN CGB GTN TAC ATG                         | 48         | 70%<br>(77/110)  | 91.6           |
|                | NosZG1R         | CSN NCA TYT CCA TGT GCA                         | 64         |                  |                |
|                | NosZG1P         | FAM-ACT GCM VBT GGT TCT GCC AYG C-MGBNFQ        | 36         |                  |                |
| NosZG2         | NosZG2F         | GRC ATC WKC MMC GAC AAG                         | 32         | 84.4%<br>(27/32) | 93.4           |
|                | NosZG2R         | HYC TCG RYG TTG TAC TGG                         | 24         |                  |                |
|                | NosZG2P         | FAM-ACC ACS CGC GTG TTC TGC G-MGBNFQ            | 2          |                  |                |
| NosZG3         | NosZG3F         | CAY TTT GCW CCD GAY AAT ATT GAA                 | 24         | 95%<br>(19/22)   | 90.7           |
|                | NosZG3R         | BSH WGT TTC ACC BGG CAT                         | 108        |                  |                |
|                | NosZG3P         | FAM-AA YTR GAA CAA GAY TGG GAT GTA CCK C-MGBNFQ | 32         |                  |                |
| NosZG4         | NosZG4F         | ATW GTT GCY GGH GGM AAA                         | 24         | 57.1%<br>(4/7)   | 94.9           |
|                | NosZG4R         | TTC CCA DGT KCC DAW TTT                         | 36         |                  |                |
|                | NosZG4P         | FAM-MGG YGA AGT KSA GAA TCC GGG WT-MGBNFQ       | 32         |                  |                |
| NosZG5         | NosZG5F         | AAC GAC AAG KCS AAY CCG                         | 8          | 100%<br>(5/5)    | 97.7           |
|                | NosZG5R         | GCG GTC GAA CTT CCA GTA                         | 0          |                  |                |
|                | NosZG5P         | FAM-GCS GTG MTC GAY CTG CGB G-MGBNFQ            | 24         |                  |                |

670



bioRxiv preprint doi: <https://doi.org/10.1101/710483>; this version posted January 6, 2020. The copyright holder for this preprint (which was not certified by peer review) is the author/funder. All rights reserved. No reuse allowed without permission.

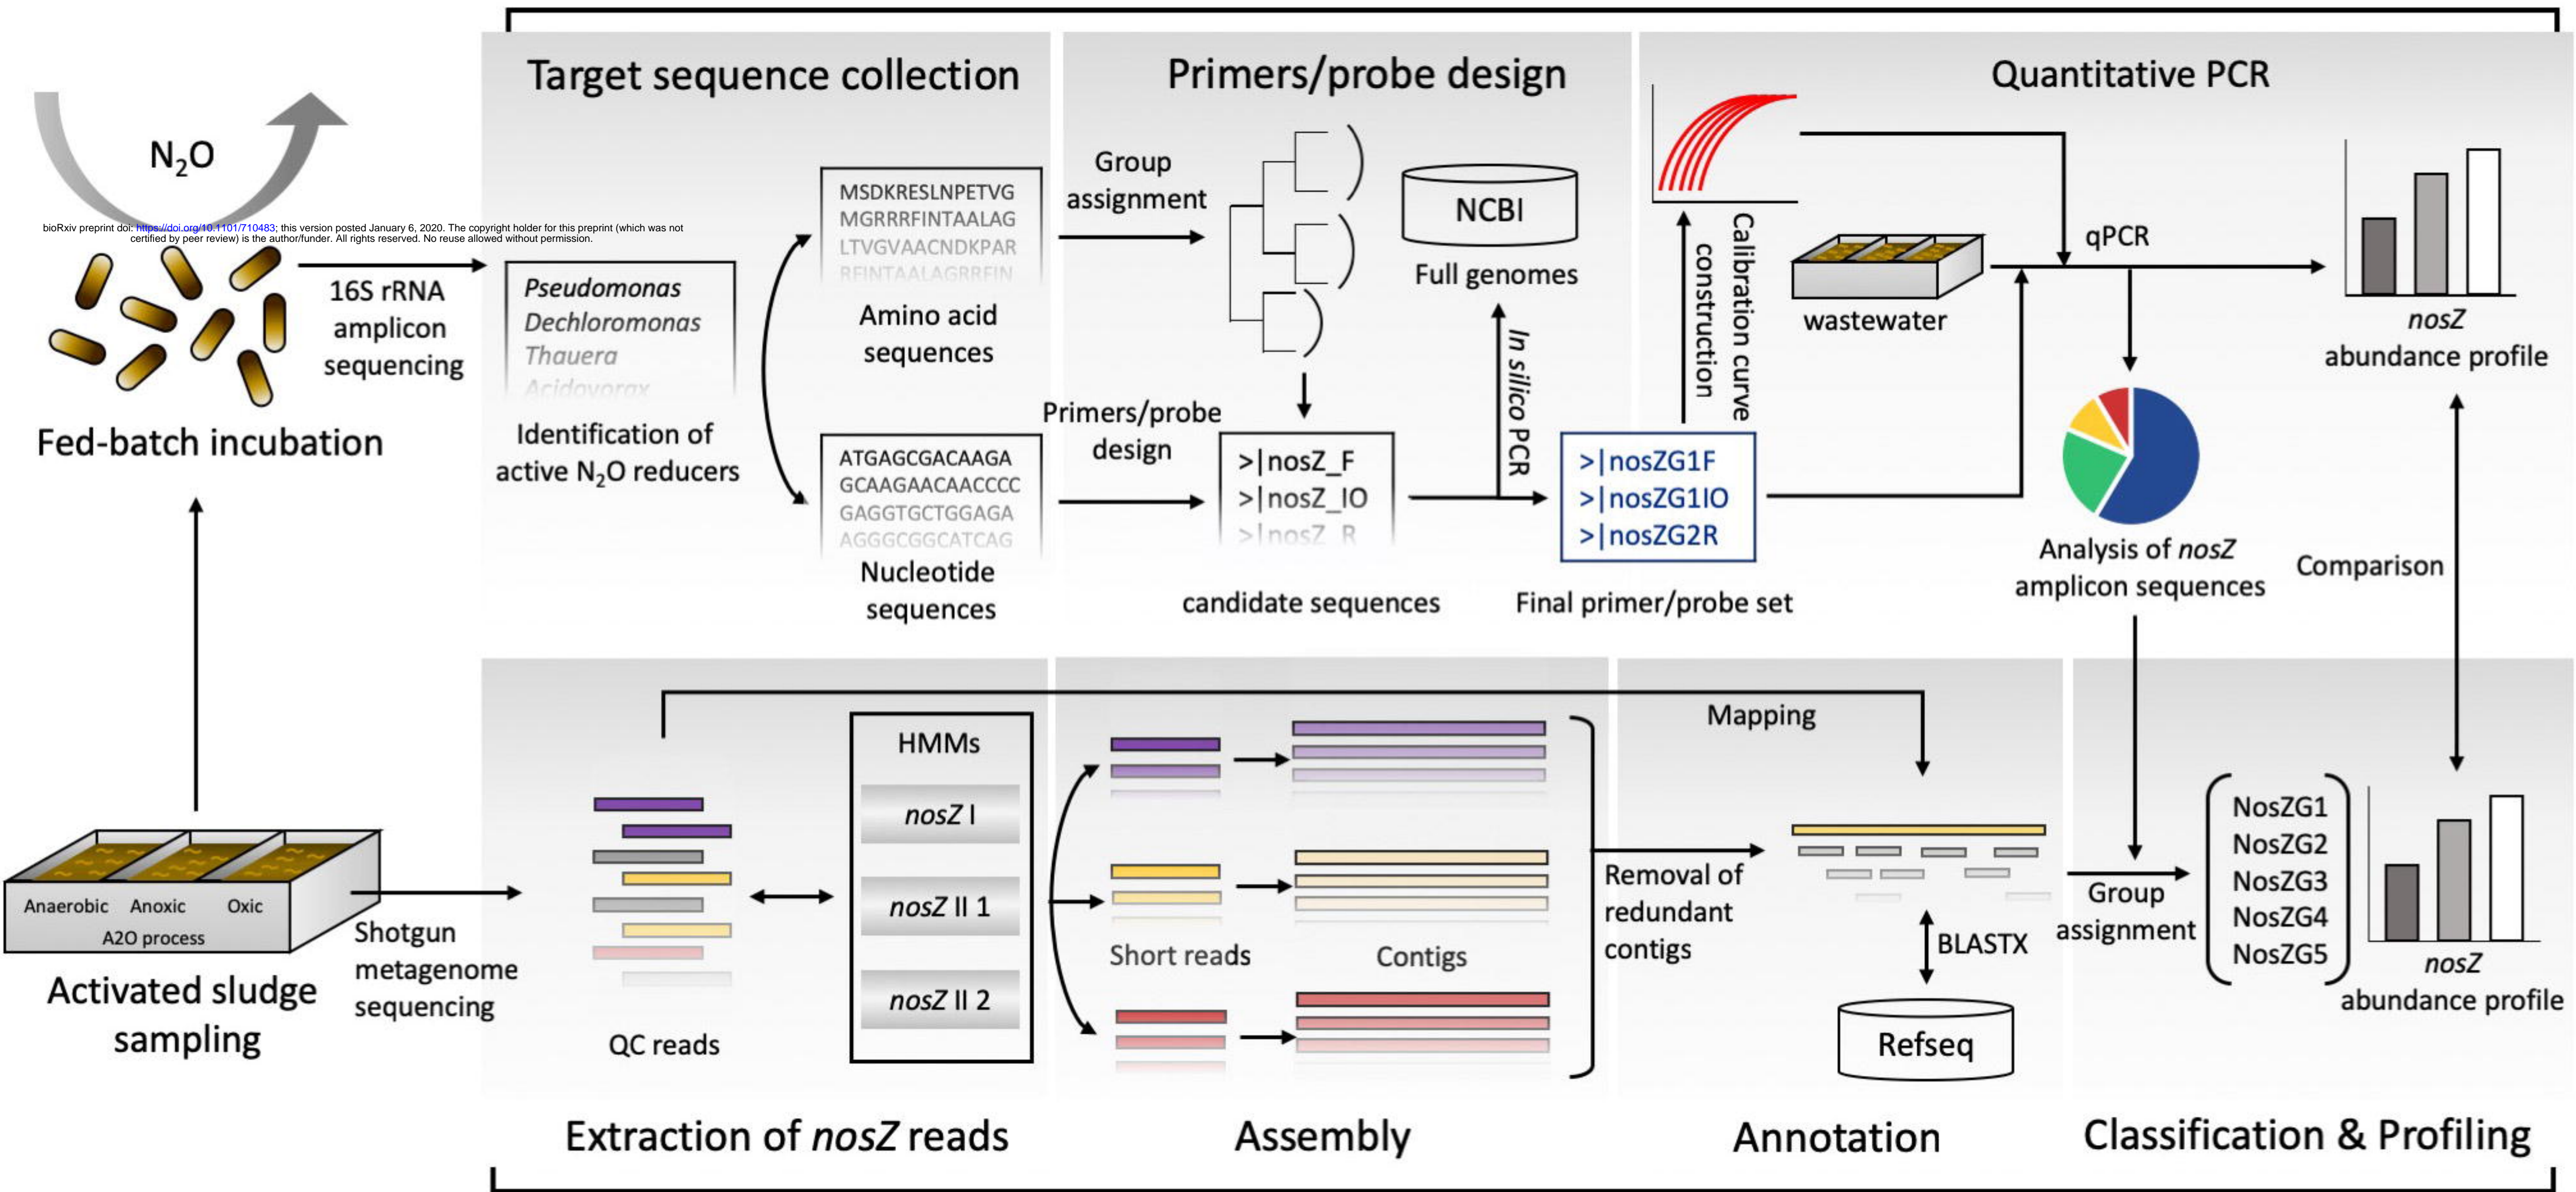



*nosZ*/16S abundance ratio

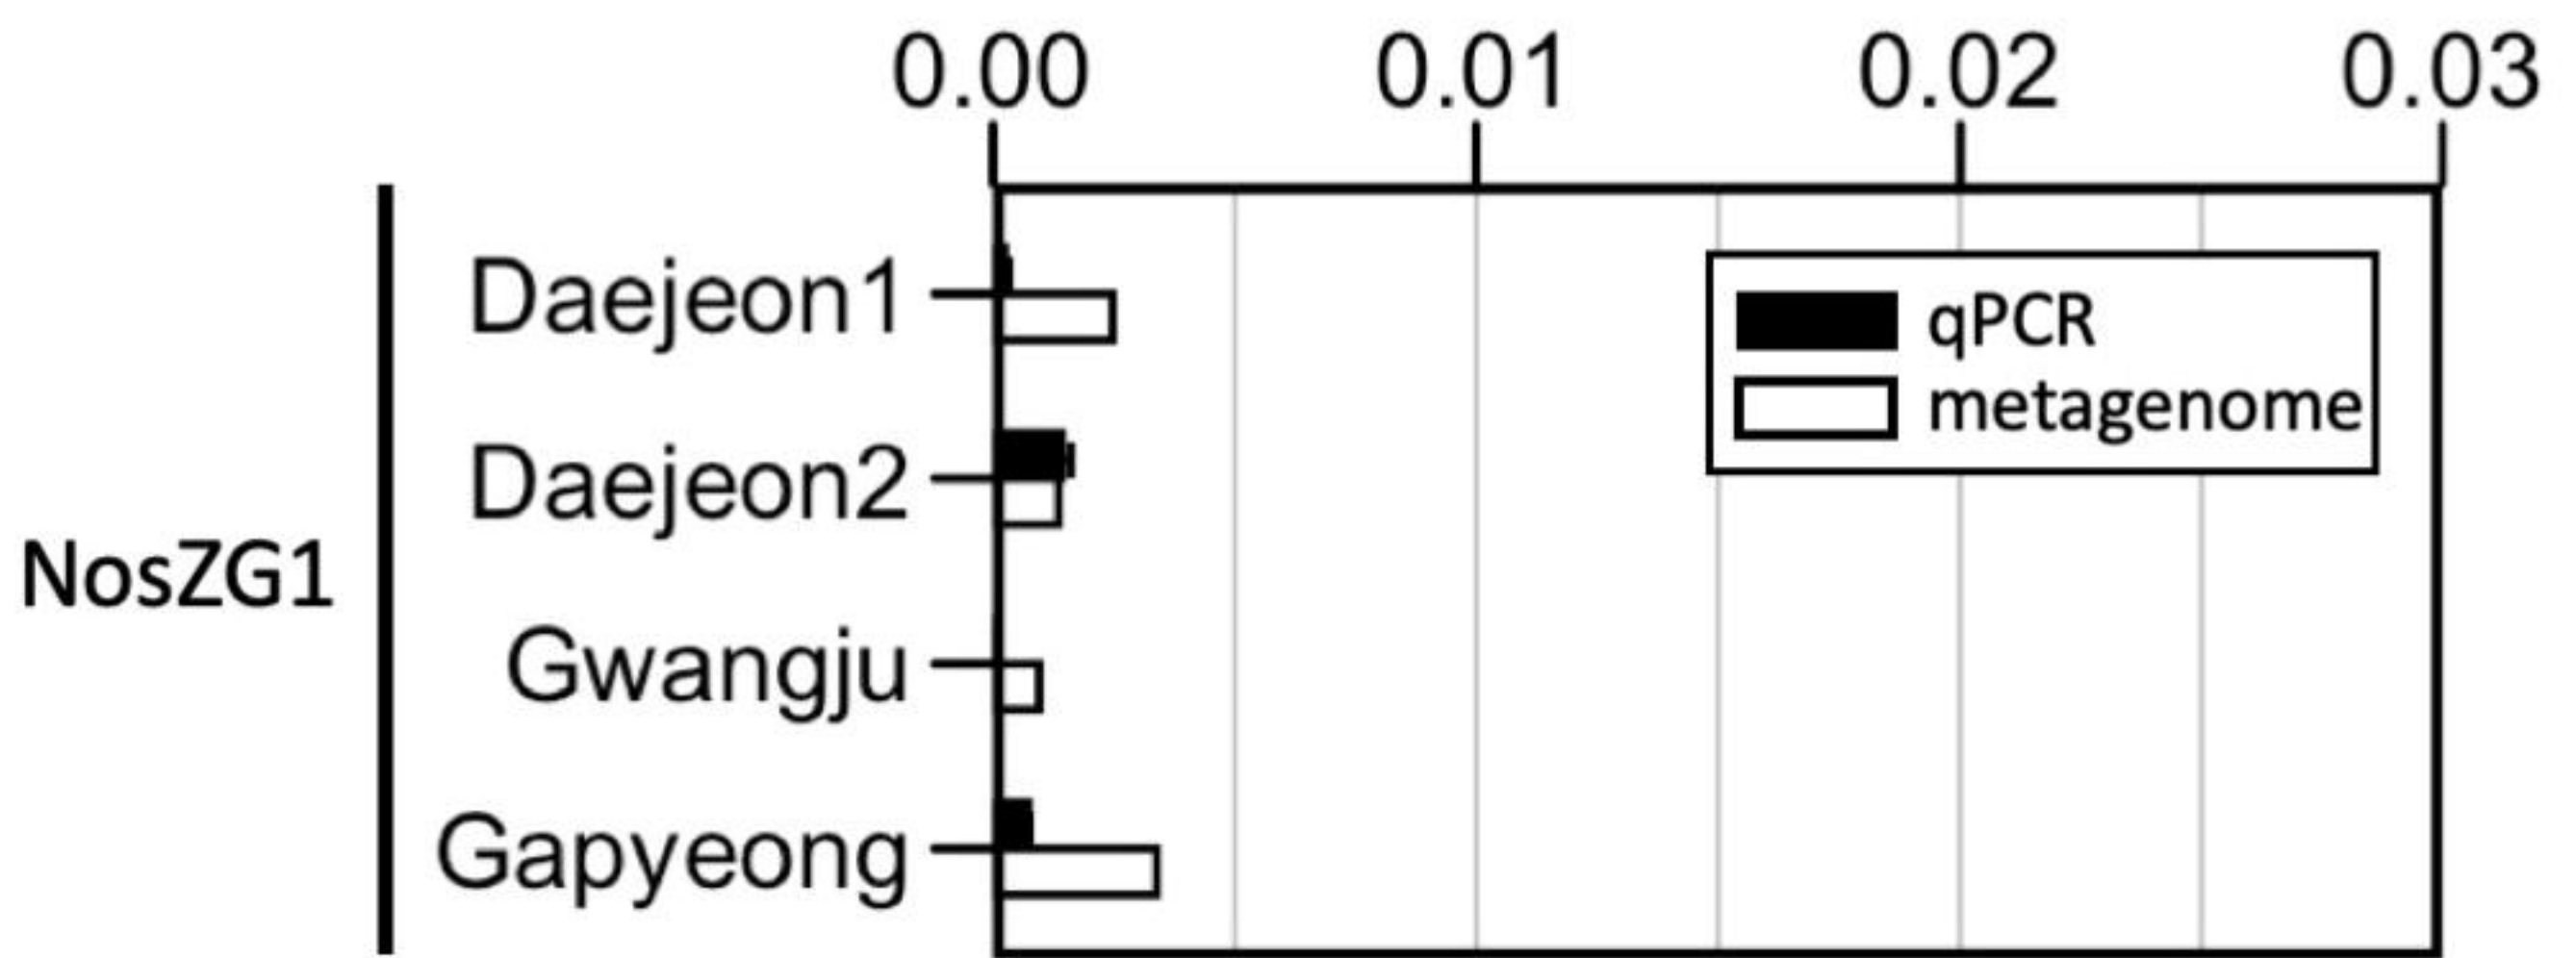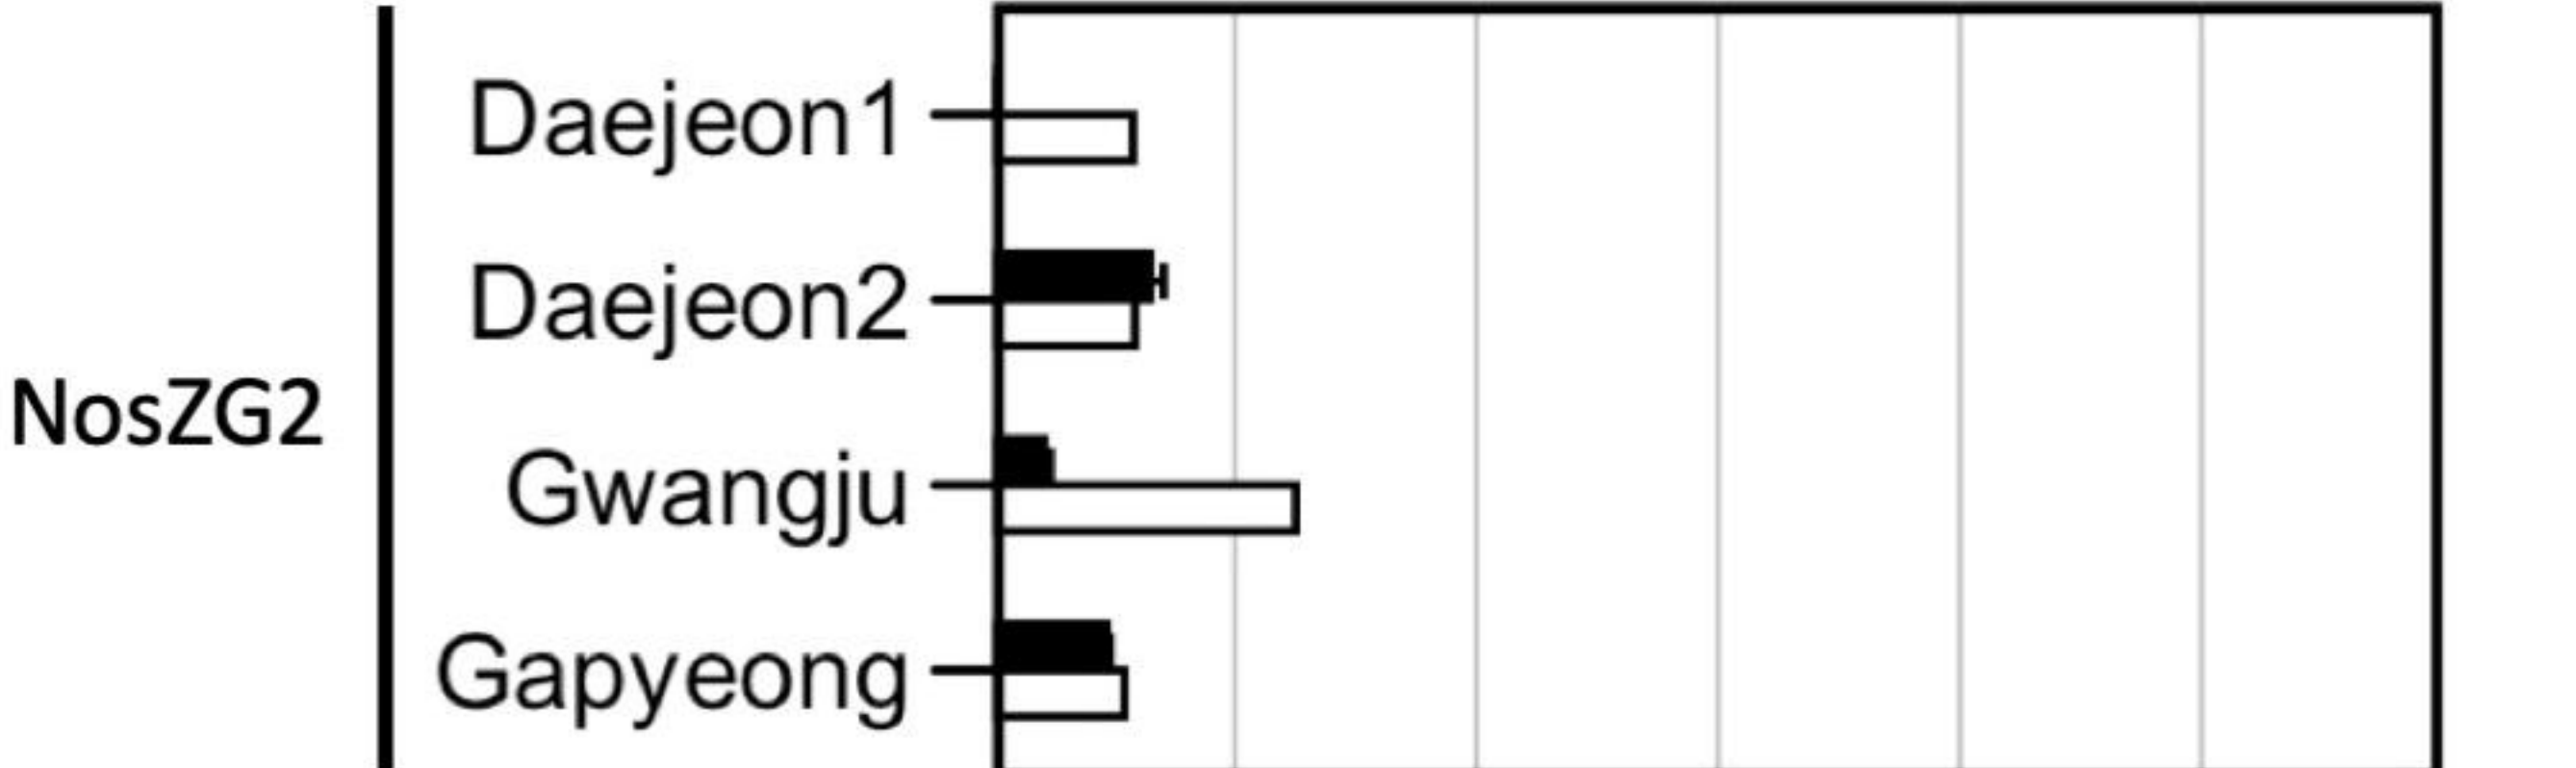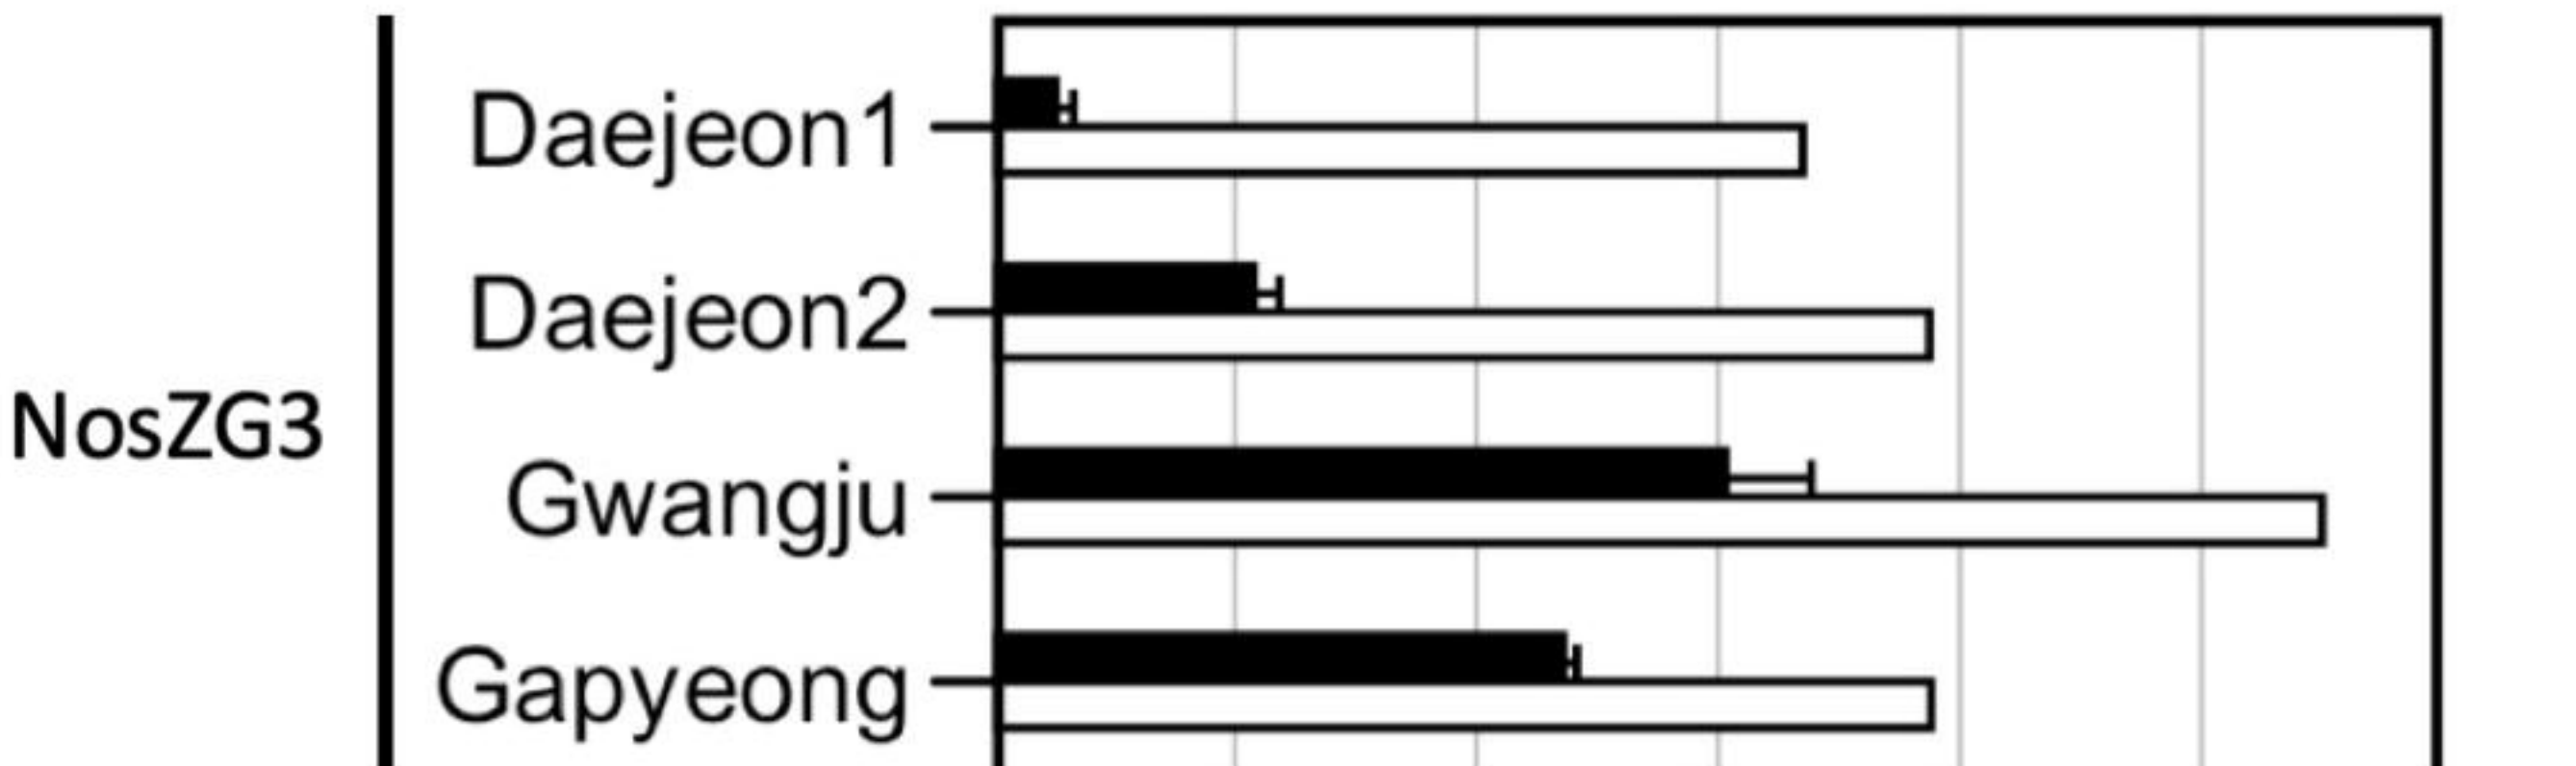

bioRxiv preprint doi: <https://doi.org/10.1101/710483>; this version posted January 6, 2020. The copyright holder for this preprint (which was not certified by peer review) is the author/funder. All rights reserved. No reuse allowed without permission.

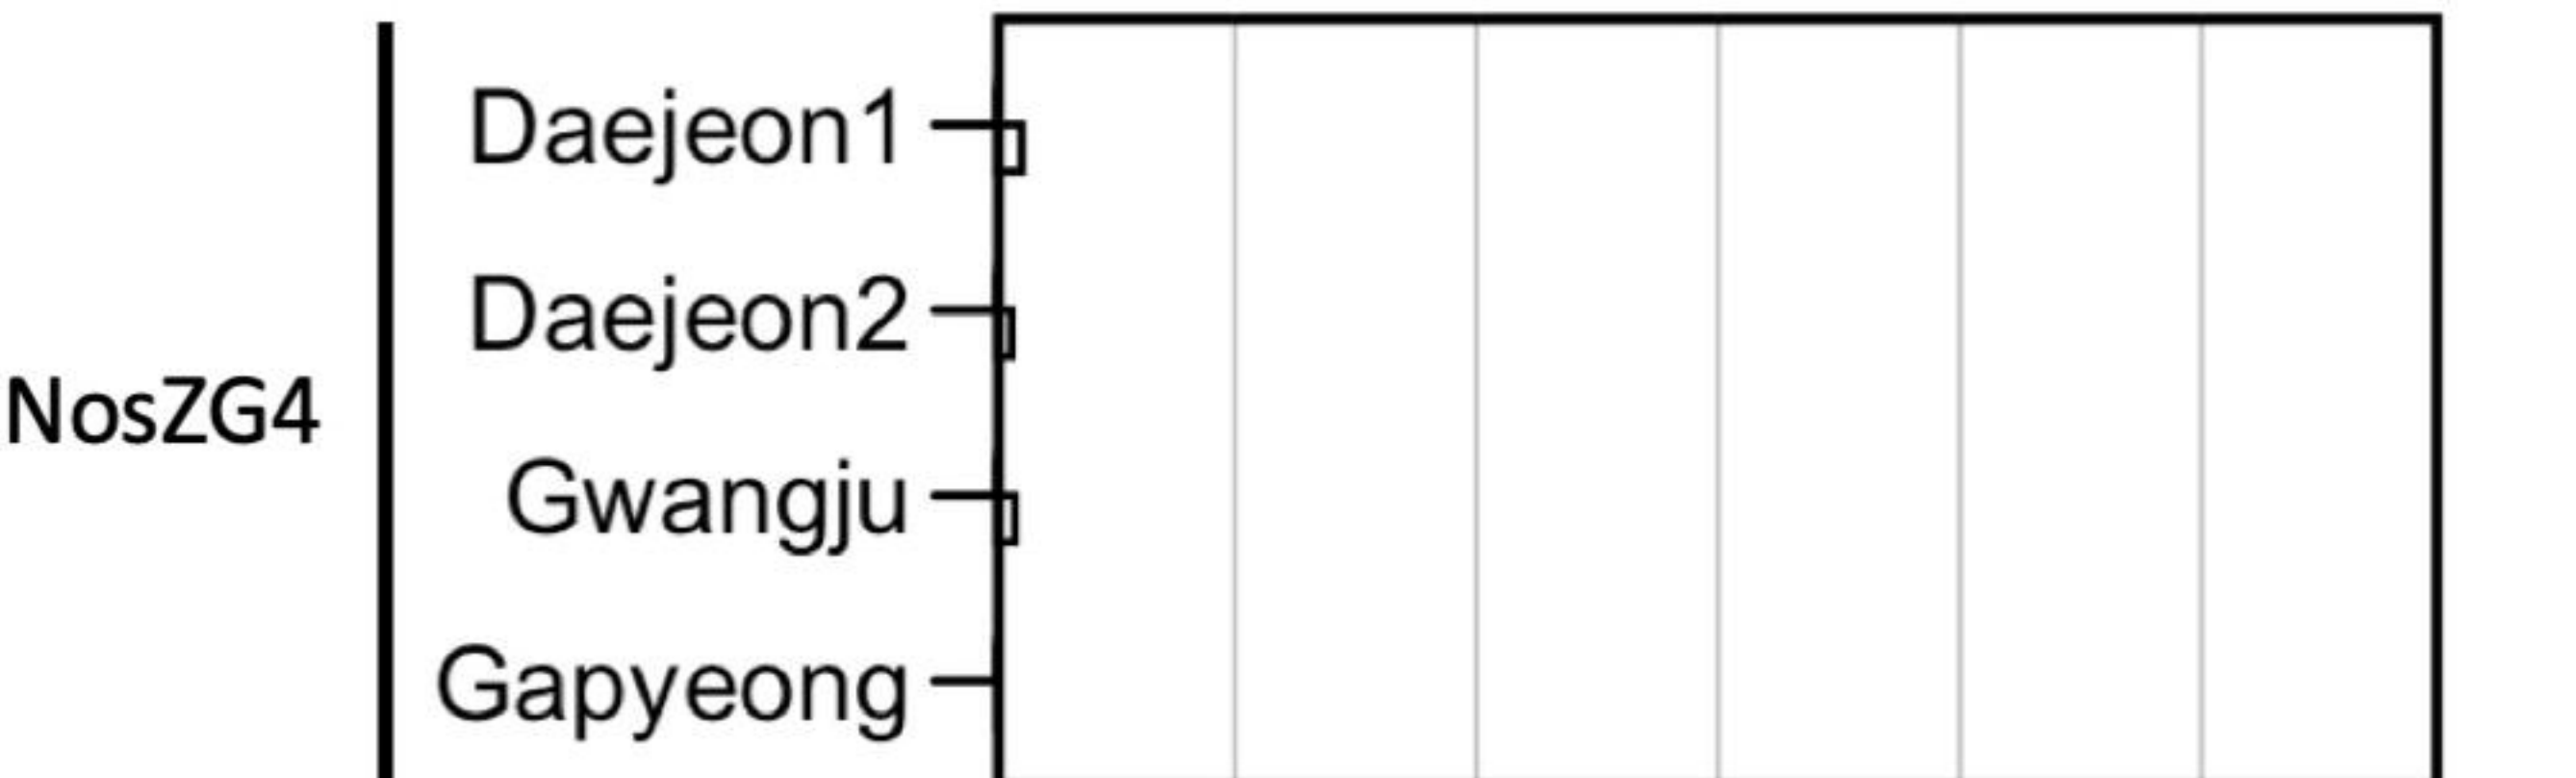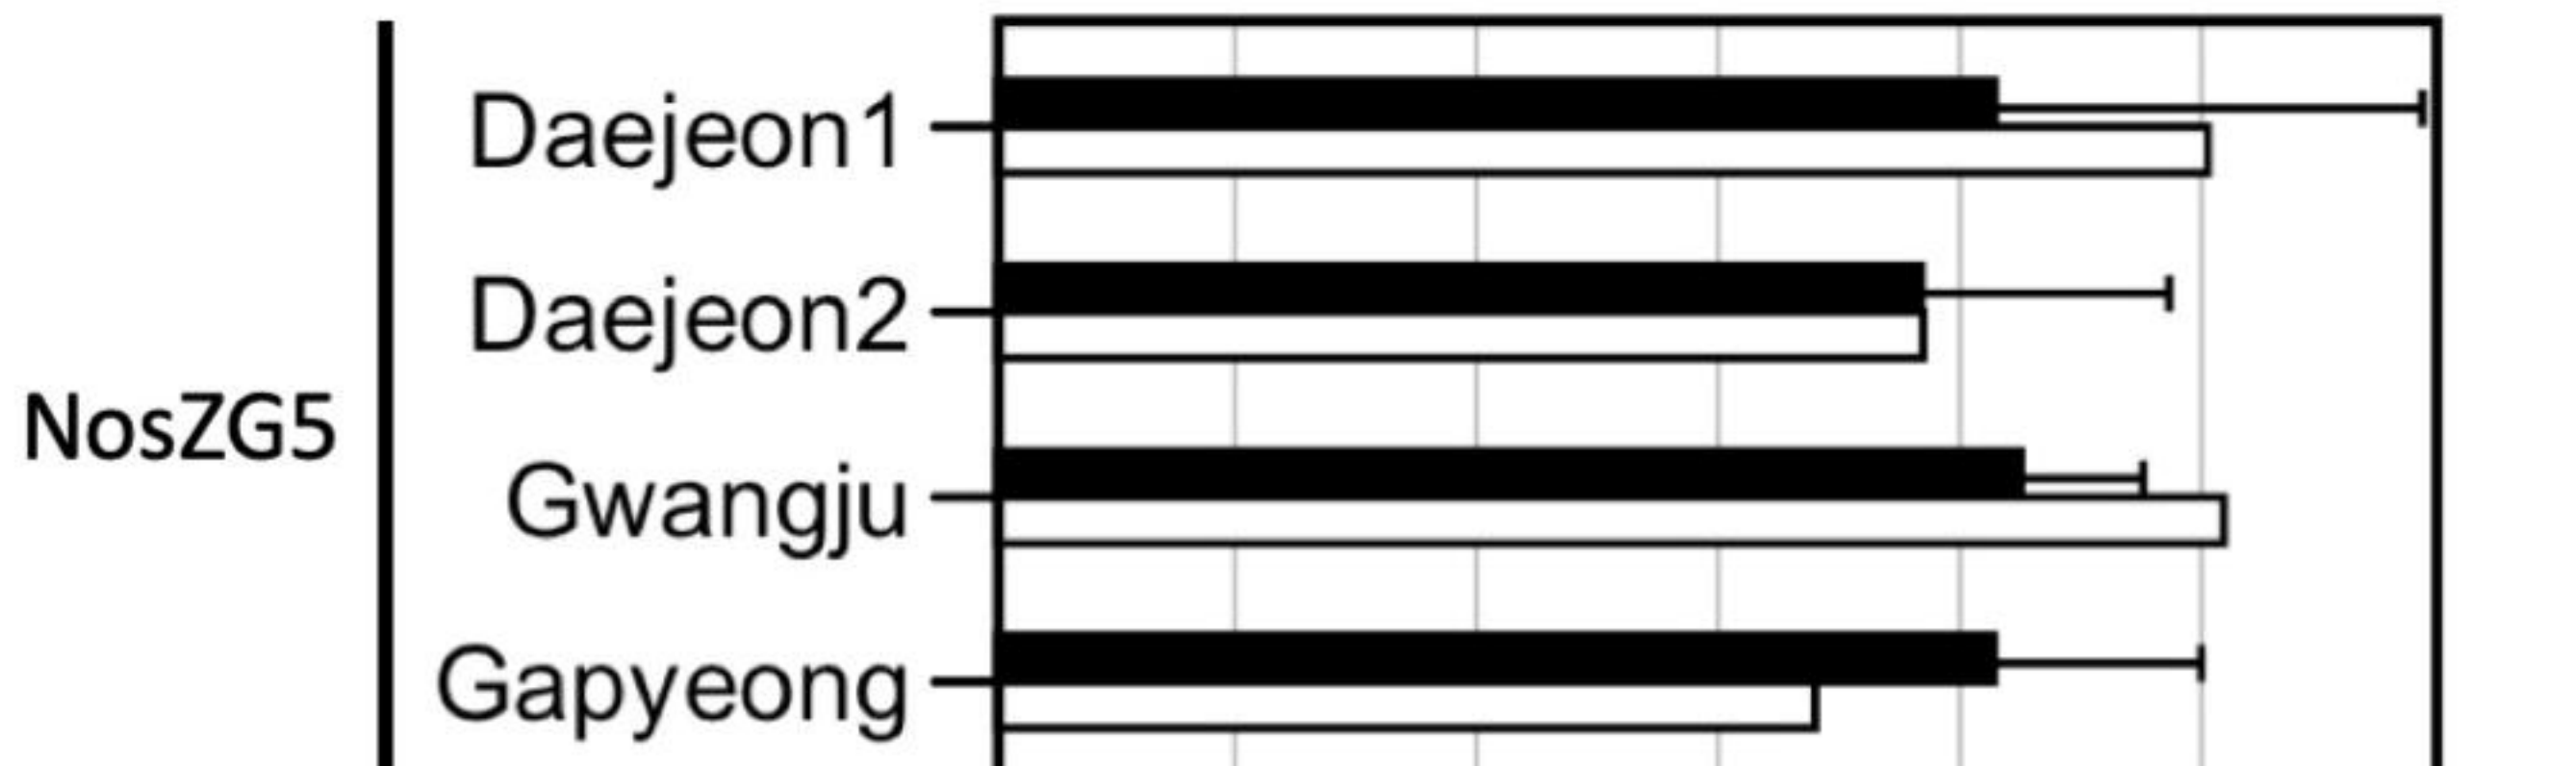

*nosZ*/*rpoB* abundance ratio



**Relative abundance (%)**

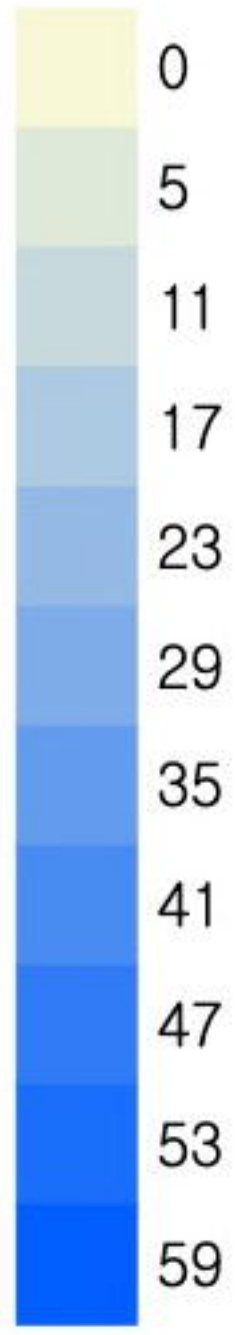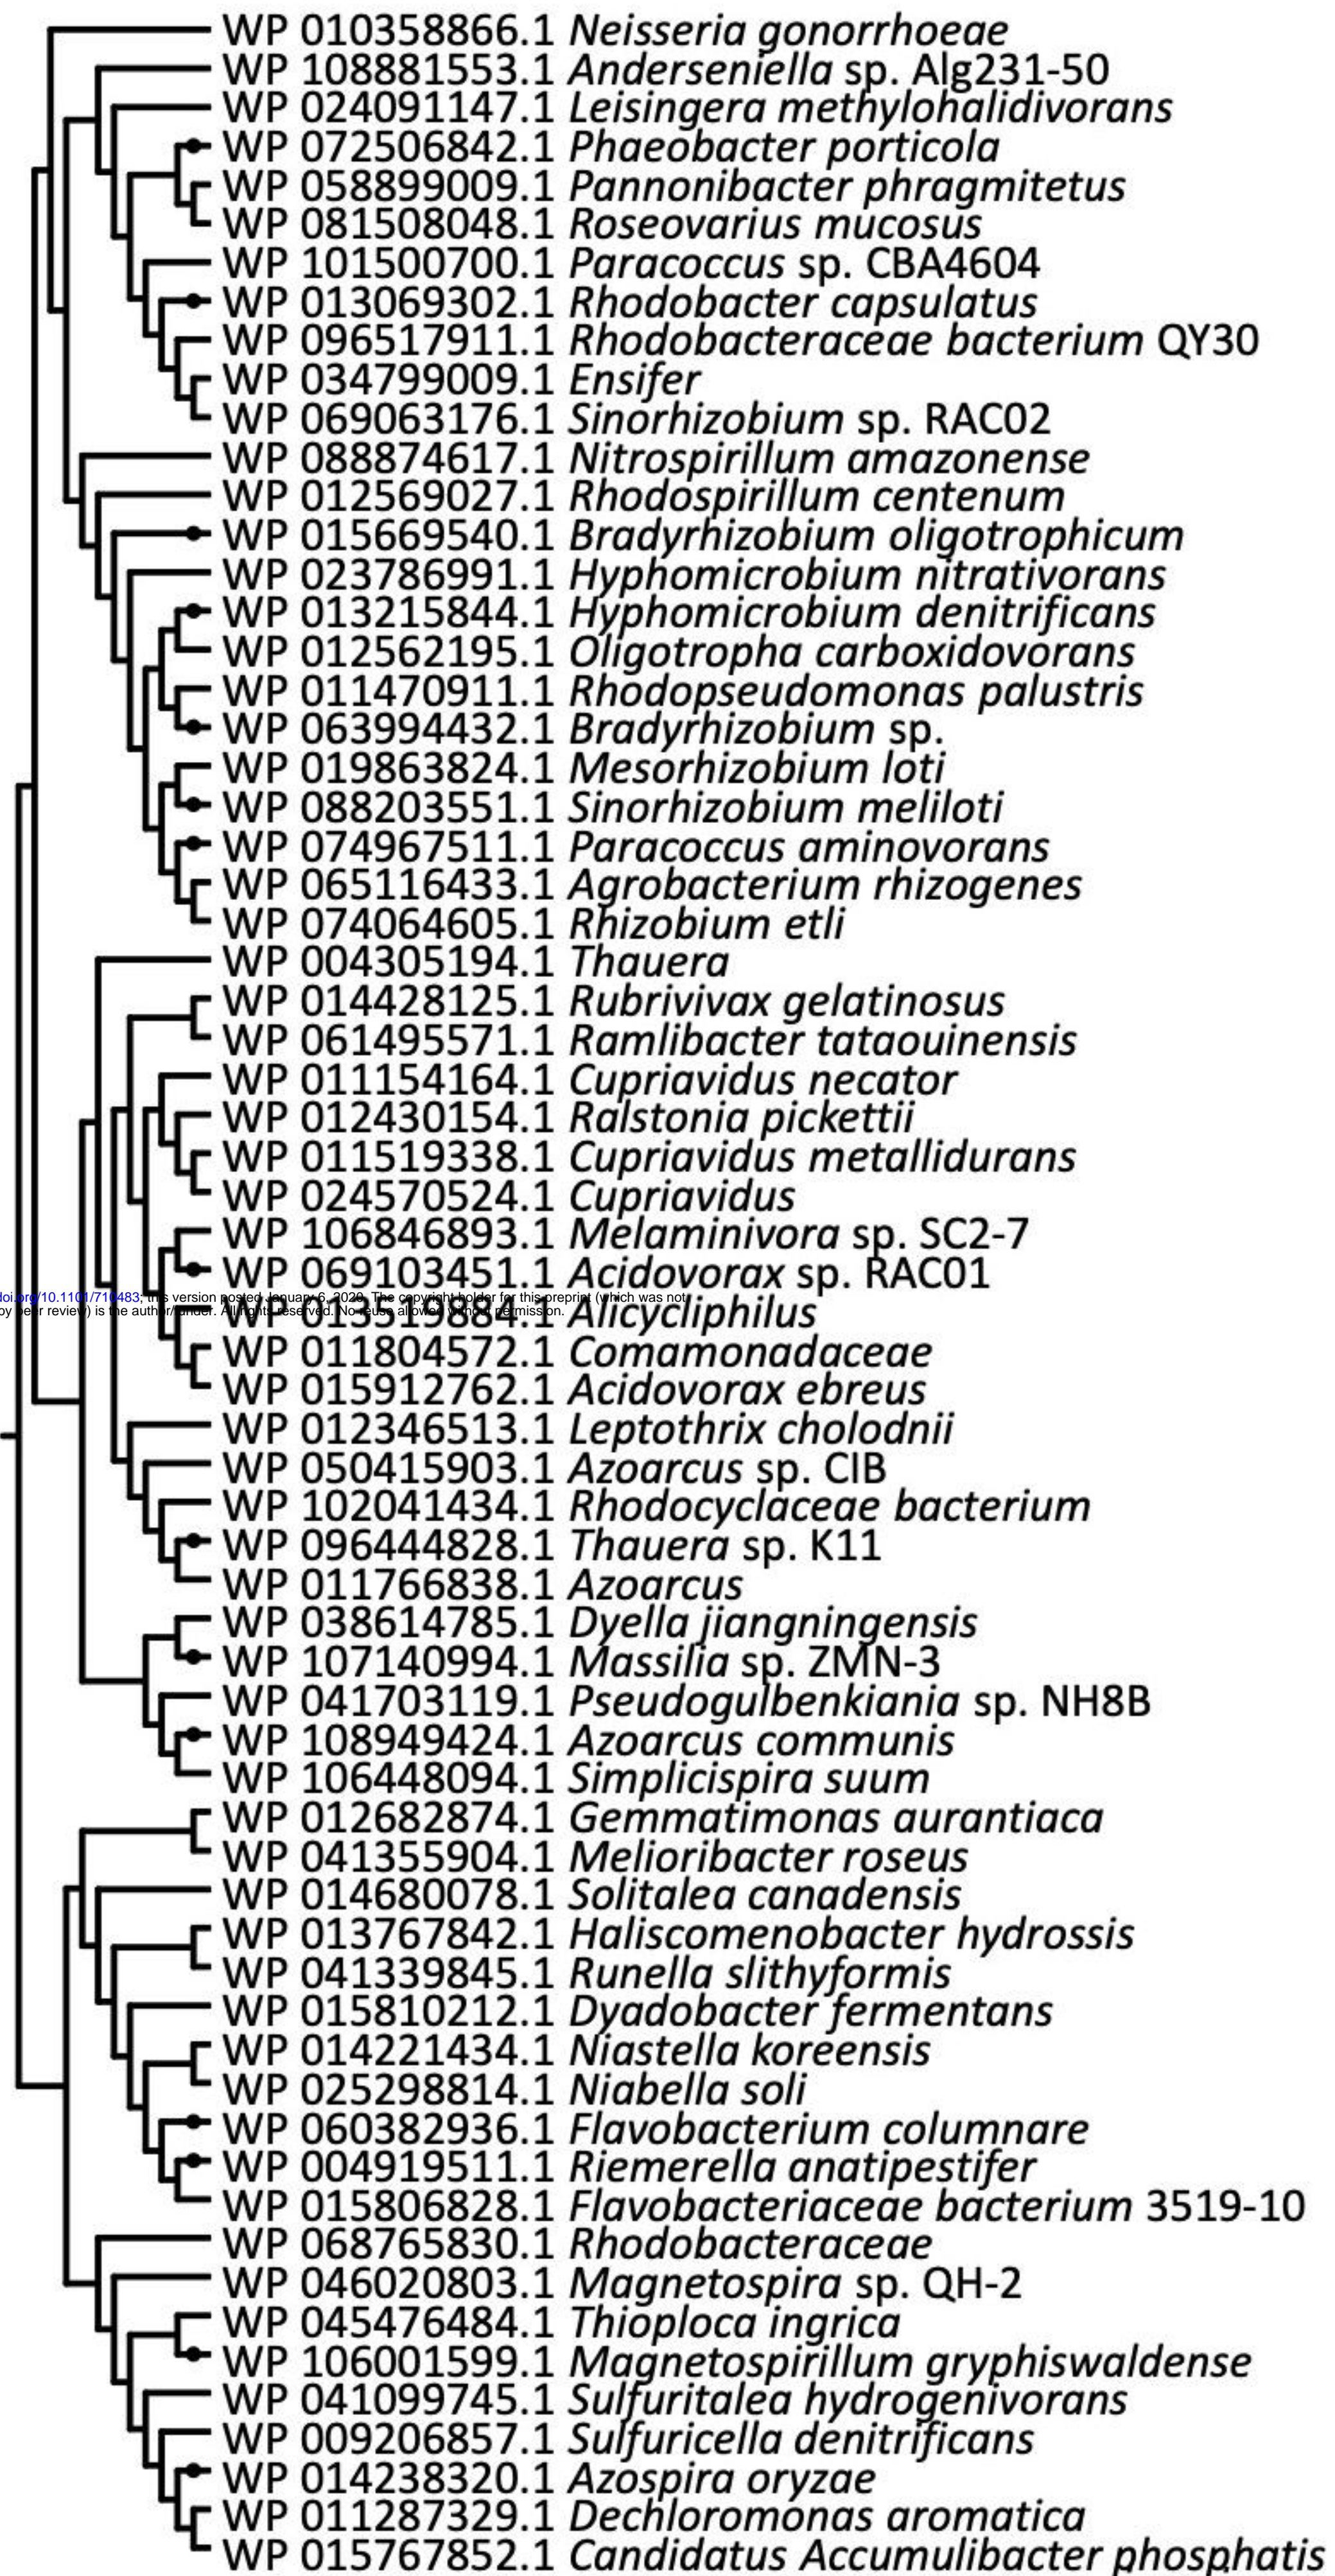

nosZ from metagenome  
 NosZG1 amplicon  
 NosZG2 amplicon  
 NosZG3 amplicon  
 NosZG5 amplicon

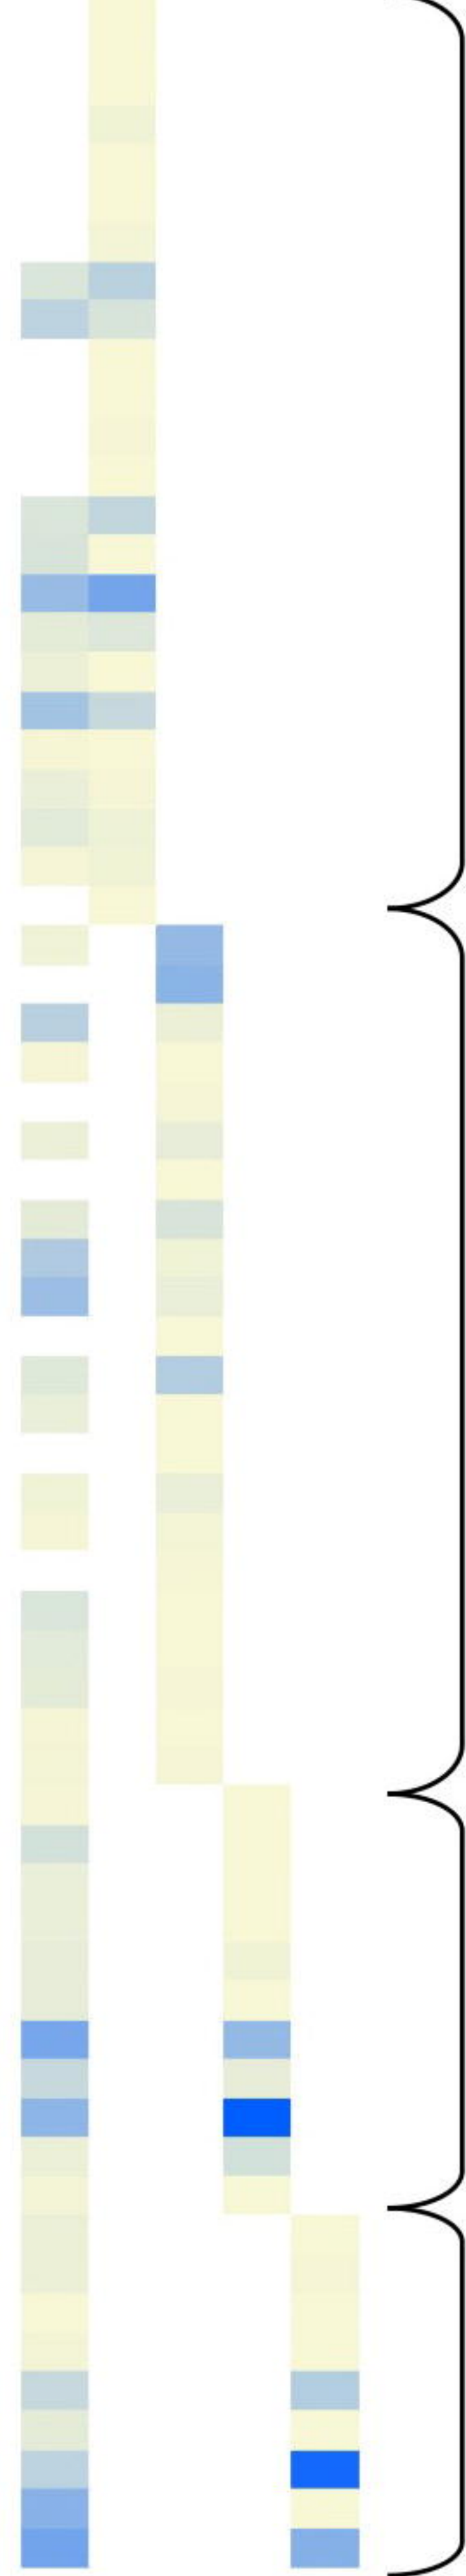

NosZG1

NosZG2

NosZG3

NosZG5

bioRxiv preprint doi: <https://doi.org/10.1101/711483>; this version posted August 6, 2020. The copyright holder for this preprint (which was not certified by peer review) is the author/funder. All rights reserved. No reuse allowed without permission.



*nosZ* copy number per mL activated sludge

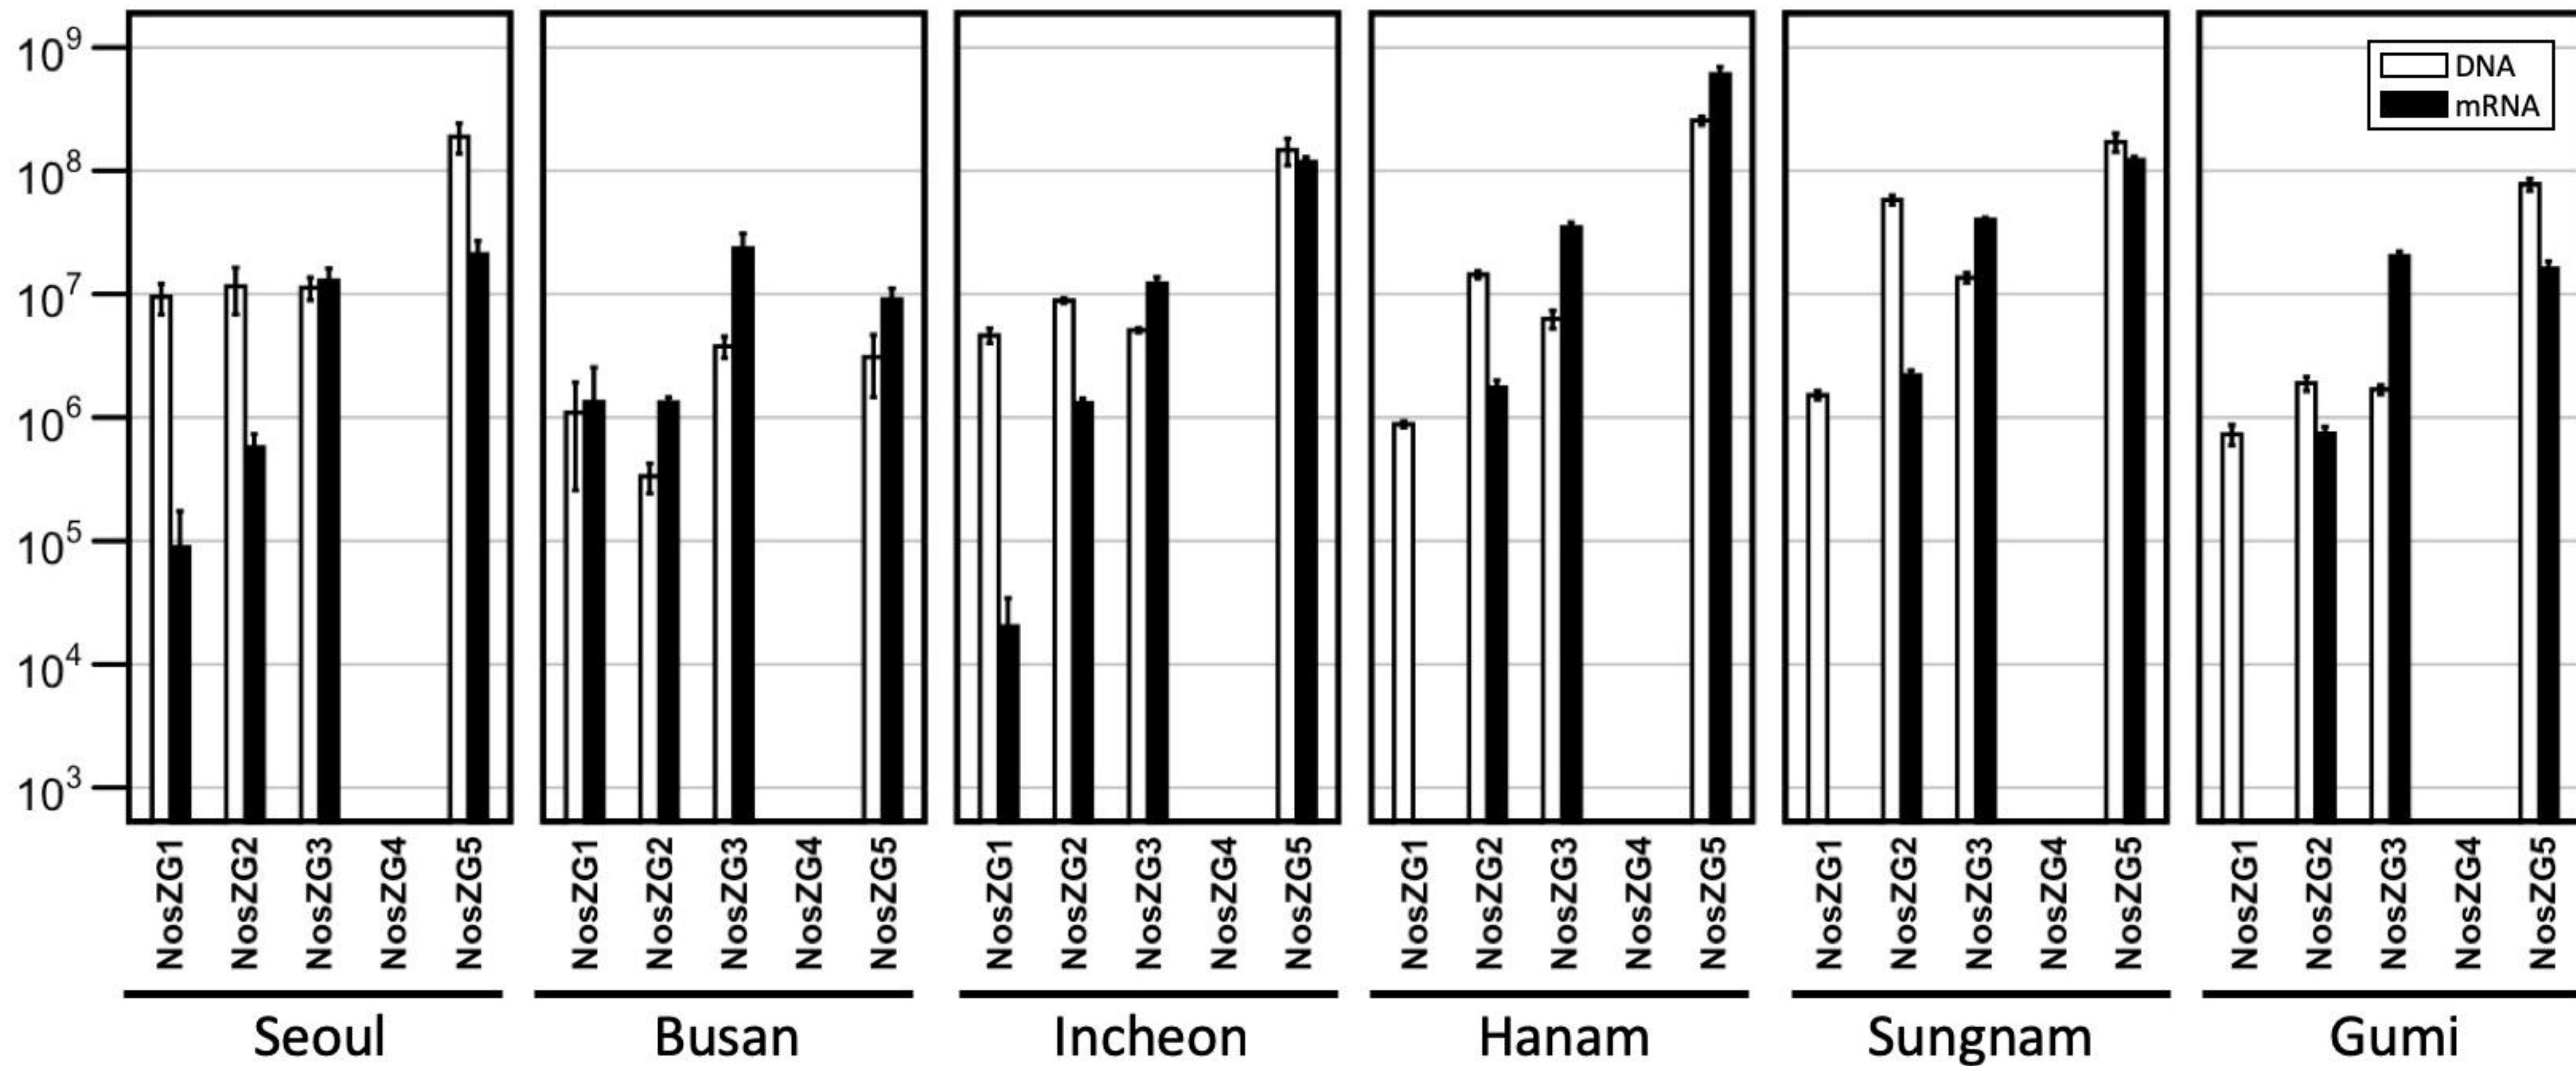

Source: https://www.biorxiv.org/content/10.1101/710483.full.pdf
