1 **Development of group-specific *nosZ* quantification method targeting active nitrous oxide**  
2 **reducing population in complex environmental samples**

3

4 DaeHyun D. Kim<sup>1</sup>, Doyoung Park<sup>1,2</sup>, Hyun Yoon<sup>1,3</sup>, Min Joon Song<sup>1</sup>, Taeho Yun<sup>1</sup>, and Sukhwan  
5 Yoon<sup>1#</sup>

6

7 <sup>1</sup> Department of Civil and Environmental Engineering, Korea Advanced Institute of Science and  
8 Technology (KAIST)

9 <sup>2</sup>Department of Civil and Environmental Engineering, Georgia Institute of Technology, Atlanta,  
10 Georgia, USA

11 <sup>3</sup>Department of Civil and Environmental Engineering, Cornell University, Ithaca, New York, USA

12

13

14 **Abstract**

15 Despite the recent interest in *nosZ*-possessing organisms as the sole N<sub>2</sub>O sink in soil and aquatic  
16 environments, quantification of *nosZ* has relied on undependable qPCR techniques prone to unspecific  
17 amplification and compromised accuracy. Here, we have combined culture-based methods with  
18 computational methods to develop TaqMan-based qPCR for quantification of microorganisms actively  
19 involved in N<sub>2</sub>O consumption in activated sludge reactors. A sewage sample was enriched in a batch  
20 reactor fed continuous stream of N<sub>2</sub> containing 20-10,000 ppmv N<sub>2</sub>O, where 14 genera of potential N<sub>2</sub>O-  
21 reducers were identified. All available amino acid sequences of NosZ affiliated to these taxa were grouped  
22 into five subgroups (two clade I and three clade II groups), and primer/probe sets exclusively and  
23 comprehensively targeting each subgroups were designed and validated with *in silico* PCR. The *nosZ*  
24 profiles of four activated sludge samples determined with the qPCR assays were compared with those  
25 analyzed from shotgun metagenome. The results of the group-specific qPCR assays were generally in  
26 agreement with the results of the metagenomic analyses, with the two subgroups (*Flavobacterium*-like and  
27 *Dechloromonas*-like) of clade II *nosZ* dominating the *nosZ*-possessing population. These quantitative tools

28 will be immensely useful for identification of the key N<sub>2</sub>O-reducing populations in environments with  
29 rapid nitrogen turnover.

30

### 31 **Introduction**

32 Nitrous oxide (N<sub>2</sub>O) is one of the three major greenhouse gases with the largest contributions to  
33 global warming, along with CO<sub>2</sub> and CH<sub>4</sub> (ref. 1). Although the contribution of N<sub>2</sub>O is estimated to be  
34 only ~6% of the net greenhouse gas emissions in terms of CO<sub>2</sub>eq, which is far less than those of CO<sub>2</sub>  
35 and CH<sub>4</sub>, eliminating one molecule of N<sub>2</sub>O from the atmosphere has the same merit as removing ~300  
36 molecule of CO<sub>2</sub> due to its high global warming potential. Besides, N<sub>2</sub>O has also been the most  
37 consequential ozone depletion agent (ref. 2, 3). Thus, global efforts to curb the increase in  
38 atmospheric N<sub>2</sub>O concentration are necessitated for sustainable future. A better understanding of the  
39 biogeochemical reactions functioning as N<sub>2</sub>O sources and sinks in nitrogen-rich anthropogenic  
40 environments, e.g., fertilized agricultural soils and wastewater treatment plants (WWTPs), is  
41 especially important for N<sub>2</sub>O emission mitigation, as such environments have been estimated as the  
42 hotspots of N<sub>2</sub>O emission to the atmosphere (ref. 4, 5).

43

44 Particularly, the biological N<sub>2</sub>O reduction mediated by Nos-type nitrous oxide reductases (NosZ) has  
45 recently attracted immense scientific attention as the sole sink of N<sub>2</sub>O on the Earth's surface at non-  
46 elevated temperature (ref. 6, 7, 8). This reaction had been, for long, known as one of the stepwise  
47 reactions constituting the denitrification pathway (ref. 4, 9). Only recently has the N<sub>2</sub>O-to-N<sub>2</sub>  
48 reduction been recognized as an independent energy-conserving reaction, as organisms possessing  
49 *nosZ*, but neither *nirK* nor *nirS*, and capable of growth with N<sub>2</sub>O as the sole electron acceptor, were  
50 found across diverse phylogenetic groups of bacteria (ref. 8, 10, 11). The majority of the N<sub>2</sub>O  
51 reducing organisms lacking *nirK* or *nirS* possess clade II *nosZ*, a novel clade of *nosZ* with substantial  
52 structural differences (e.g., Sec-type N-terminal signal peptide) from the previously known clade I  
53 *nosZ* (ref. 8). Several independent research groups have reported the higher affinity of the clade II  
54 *nosZ*-possessing organisms to N<sub>2</sub>O, and more specifically, the organisms with *nosZ* closely affiliated  
55 to *Dechloromonas* spp. have been reported with particularly low whole-cell Michaelis constants

56 ( $K_{m,app}$ ), suggesting that this group of organisms may be involved in consumption of low-  
57 concentration  $N_2O$  produced *in situ* via diverse biotic and abiotic processes (ref. 11, 12, 13, 14). The  
58 microbial community developed in the laboratory-scale biofilter treating 100 ppmv  $N_2O$  included the  
59 clade II  $N_2O$  reducer *Flavobacterium* spp. as the most abundant *nosZ*-carrying organisms, also  
60 supporting the significance of clade II  $N_2O$  as an important  $N_2O$  sink (ref. 15, 16).  
61  
62 Increasing number of recent studies on environmental nitrogen cycling have reported the correlation  
63 between  $N_2O$  reduction activity or net  $N_2O$  emission and *nosZ* abundance or the *nosZ*-to-(*nirS*+*nirK*)  
64 gene abundance ratio (ref. 11, 17, 18, 19). Since the discovery of the clade II *nosZ*, the clade I-vs-  
65 clade II quantification has become immensely popular as indicators of the  $N_2O$  sink capability (ref. 14,  
66 20, 21). Most, if not all, of these *nosZ* gene quantifications were performed using quantitative  
67 polymerase chain reactions (qPCR) using SYBR Green detection chemistry (ref. 18, 22). The positive  
68 results (coverage over 85% and unspecific amplification below 10%) from the *in silico* analyses of the  
69 available *nosZ* primer sets may give an unjustified impression that these qPCR assays may be reliable  
70 quantitative molecular tools (ref. 23); however, application of SYBR Green qPCR for quantification  
71 of target DNA sequences in complex environmental samples has been regarded problematic due to the  
72 specificity issues (ref. 24). The melting curve analysis, the only means to check the specificity of  
73 SYBR Green qPCR assays, is not applicable when the assays are used for targeting functional genes  
74 in complex microbiomes, as amplicons with different sequences yield distinct melting curves (ref. 18).  
75 The specificity of the oft used primer sets for clade I and clade II *nosZ* (1840F: 5'-  
76 CGCRACGGCAASAAGGTSMSST-3' / 2090R: 5'-CAK RTGCAKSGCRTGGCAGAA-3' for  
77 clade I *nosZ*; *nosZ*-II-F: 5'-CTIGGICCIYTKCAYAC-3' / *nosZ*-II-R: 5'-  
78 SKSACCTTITTRCCITYICG-3' for clade II *nosZ*) have not yet been closely examined, although  
79 these primers have been repeatedly used in diverse fields of study (ref. 19, 25, 26, 27). Besides, the  
80 qPCR efficiencies reported for amplification with these degenerate primer sets have been repeatedly  
81 reported to be below 80%, also putting the reliability of the previous qPCR results to question (ref. 19,  
82 28, 29).  
83

84 Quantitative functional gene analysis using shotgun metagenomics approach has become increasingly  
85 popular recently (ref. 30, 31, 32, 33, 34). In this approach, short sequencing reads are either 1)  
86 mapped onto the targeted functional gene sequences in assembled contigs identified using BLAST  
87 and/or HMMER algorithms or 2) directly assigned as quality-trimmed raw reads to the targeted  
88 functional gene sequences using the same algorithms, and the read counts are used for calculating the  
89 relative abundances of the functional genes with respect to the total microbial population (determined  
90 from the read counts of a single-copy housekeeping gene, e.g., *rpoB*). A number of such functional  
91 gene analysis tools with relatively high reliability are now available on line and clade-specific  
92 quantification of *nosZ* using short-read HiSeq sequencing reads have been previously performed (ref.  
93 30, 33); however, the high cost of the high-throughput shotgun sequencing (for any meaningful results,  
94 a sequencing depth of >5 Gb is often required for shotgun metagenome analyses) and prolonged  
95 processing time still pose a yet unsurmountable barrier for implementation in real-time monitoring of  
96 environmental microbiomes undergoing rapid changes (ref. 35). Therefore, qPCR is still regarded as  
97 the preferred choice of quantitative molecular tool for such purpose, in spite of its own imperfectness.  
98

99 The specificity issues with the SYBR-Green qPCR can be resolved by implementing the TaqMan  
100 chemistry-based qPCR technique that requires an additional consensus region for probe binding (ref.  
101 24); however successful cases of such approach has not been reported for *nosZ* genes, presumably due  
102 to the difficulty of finding three neighboring consensus regions among the prohibitively divergent  
103 *nosZ* gene sequences (ref. 8, 10, 33). Here, we have successfully developed TaqMan-based qPCR  
104 reactions targeting four groups (two clade I *nosZ* groups and two clade II *nosZ* groups) of *nosZ* with  
105 high coverage and specificity, while maintaining PCR efficiency above 90%, which is often regarded  
106 as the criterion for reliable quantification (ref. 36). The N<sub>2</sub>O-reducing population information  
107 gathered from laboratory cultivations of activated sludge samples with varying concentrations of N<sub>2</sub>O  
108 was used to restrict the targets to active N<sub>2</sub>O-reducing organisms, enabling design of mutually  
109 exclusive primer and probe sets targeting the five *nosZ* groups. The designed qPCR methods were  
110 validated with different activated sludge samples by comparing the qPCR quantification results with

111 *nosZ* quantification data processed from the shotgun metagenome sequences. The PCR amplicons  
112 were also analyzed to verify the specificity and coverage of the qPCR assays.

113

## 114 **Materials and methods**

### 115 **Sample collection**

116 The wastewater inoculum for the N<sub>2</sub>O enrichment experiments were grab-sampled from the anoxic  
117 section of the activated sludge tank at Daejeon municipal WWTP (36°23'5" N, 127°24'28" E) in  
118 September 2016 (denoted as Daejeon1). Additional wastewater samples for validation of the designed  
119 qPCR reactions were collected at the same WWTP (Daejeon2) in February 2019 and two other  
120 activated sludge WWTPs located in Gwangju and Gapyeong (35°09'22.4"N 126°49'51.6"E and  
121 37°49'00.1"N 127°31'13.0"E, respectively) in January and February of 2019, respectively. Each  
122 wastewater sample was collected in a 2-L polyethylene bottle filled up to the brim to minimize  
123 oxygen ingress. The sample bottles were immediately placed in a cooler and transported to the  
124 laboratory. The wastewater samples were stored at 4°C until use.

125

### 126 **Fed-batch enrichment of activated sludge samples and identification of active N<sub>2</sub>O-reducing** 127 **groups**

128 A simple fed-batch bioreactor was constructed for enrichment of active N<sub>2</sub>O-reducers in the Daejeon1  
129 wastewater sample. A 500-mL glass bottle with a side port (Duran, Mainz, Germany) was fitted with  
130 a GL45 cap with three ports. Two of the ports were used as the inlet for N<sub>2</sub>O-carrying gas and the gas  
131 outlet from the bottle and the remaining port was used for aqueous phase sampling. The side port of  
132 glass bottle was used for sampling of the gaseous phase. The modified MR-1 medium was prepared  
133 by adding per 1 L of deionized water, 0.5 g NaCl, 0.41 g sodium acetate, 0.23 g KH<sub>2</sub>PO<sub>4</sub>, 0.46 g  
134 K<sub>2</sub>HPO<sub>4</sub>, 0.026 g NH<sub>4</sub>Cl, 1 ml of 1000X trace metal solution, and 1 mL of 1000X vitamin stock  
135 solution (ref. 37). The reactor with 200 mL MR-1 medium (40% of the total reactor volume) was  
136 flown through with N<sub>2</sub> gas carrying 0 ppmv, 20 ppmv, 200 ppmv or 10,000 ppmv N<sub>2</sub>O (Samo  
137 specialty gas, Daejeon, South Korea) for 30 hours before inoculation. After inoculating the medium  
138 with 2 mL of the Daejeon1 sample, the same gas used for flushing was bubbled through the medium

139 at the volumetric flowrate of 20 mL min<sup>-1</sup> to provide the sole electron acceptor N<sub>2</sub>O to the microbial  
140 culture and maintain the reactor at anoxic condition. The reactor operated with >99.999% N<sub>2</sub> gas  
141 served as the control to confirm that the microbial consortia were enriched with N<sub>2</sub>O as the electron  
142 acceptor and the contribution of O<sub>2</sub> contamination to microbial growth was minimal. The N<sub>2</sub>O  
143 concentration in the headspace of the reactor was monitored with a HP6890 Series gas  
144 chromatography fitted with an HP-PLOT/Q column and an electron capture detector (Agilent, Palo  
145 Alto, CA), with the injector, oven and detector temperatures set to 200, 85, and 250 °C, respectively  
146 (ref. 38). The O<sub>2</sub> concentration in the fed-batch reactor was monitored with a FireSting-O<sub>2</sub> oxygen  
147 meter (Pyroscience, Aachen, Germany); however, due to the relatively high detection limit of the  
148 sensor (the gas phase concentration of ~0.1% v/v), complete absence of O<sub>2</sub> was not guaranteed.

149

150 The growth of bacterial population in the reactor was monitored with quantitative polymerase chain  
151 reaction (qPCR) using TaqMan chemistry targeting the conserved region of eubacterial 16S rRNA  
152 genes. At each sampling time point, an 1.5-mL aliquot was collected from the aqueous phase of the  
153 reactor and DNA was extracted from the pellets using DNeasy Blood & Tissue Kit (QIAGEN, Hilden,  
154 Germany) following the protocol provided by the manufacturer. Quantitative PCR was performed  
155 with the 1055f (5'-ATGGCTGTCGTCAGCT-3') / 1392r (5'-ACGGGCGGTGTGTAC-3') /  
156 Bac1115Probe (5'-CAACGAGCGCAACCC-3') primer and probe set targeting a conserved region of  
157 bacterial 16S rRNA genes using a QuantStudio3 platform (Thermo Fisher Scientific, Waltham, MA)  
158 (ref. 39). Incubation was halted when the population of the enrichment reached a plateau, as indicated  
159 by three consecutive measurements without increased gene counts. The reactor was dismantled and  
160 the aqueous phase was collected for microbial composition analysis.

161

162 The hypervariable V6–8 region of the 16S rRNA gene was amplified with 926F: 5'-  
163 AAACYAAAKGAATTGRCGG-3' / 1392R: 5'-ACGGGCGGTGTGTTC-3' primer set and MiSeq  
164 sequencing of the amplicons was outsourced to Macrogen Inc. (Seoul, Korea). The raw sequence  
165 reads have been deposited in the NCBI short reads archive (SRA) database (accession:  
166 PRJNA552413). The raw sequence data were processed using the QIIME pipeline v 1.9.1. The

167 sequence reads with the quality scores lower than the default cut-off (the phred score of 20) were  
168 removed. The trimmed reads were clustered to the Greengenes (v 13.8) 16S rRNA gene database with  
169 the cut-off value set to 0.97. The remaining reads, which failed to cluster with the reference database,  
170 were clustered into *de novo* OTUs with the same cut-off value (0.97). The taxonomy was assigned to  
171 each OTU using the RDP classifier against the Greengenes v13.8 database. For each enrichment  
172 sample, the genera assigned to the OTUs with the relative abundances higher than 0.3% were selected.  
173 The lists of all NosZ proteins belonging to the organisms affiliated to these genera were extracted  
174 from the Uniprot ([www.uniprot.org](http://www.uniprot.org)) database (accessed in March 2017) (Table S1). The initial list  
175 obtained with the search keywords, “NosZ”, “nitrous”, “nitrous oxide”, and “nitrous-oxide” was  
176 manually curated to retain only the NosZ proteins.

177

#### 178 **Design of degenerate primers and probes for group-specific qPCR of *nosZ* genes**

179 The pooled *nosZ*/NosZ sequence data included, in total, 174 nucleotide sequences and the  
180 corresponding amino acid sequences from 14 distinct genera. Subsequently, a multiple sequence  
181 alignment was performed with these amino acid sequences, using MUSCLE algorithm with the  
182 parameters set to the default values (ref. 40). The NosZ phylogenetic tree was constructed using the  
183 neighbor-joining method in MEGA 7.0 with the bootstrap value of 500 (ref. 41). The *nosZ* gene  
184 sequences were clustered into five groups (NosZG1-5) according to the positions of the corresponding  
185 NosZ sequences in the phylogenetic tree, which consisted of five phylogenetically distinct  
186 subbranches.

187

188 For each *nosZ* group, a primers and probe set was designed using the PriMux software to  
189 comprehensively and exclusively target the *nosZ* gene sequences within the group (ref. 42). The  
190 parameters were modified from the default values to obtain the optimal candidate degenerate  
191 oligonucleotide sequences for qPCR (length: 18-24 bp, amplicon size: 80-400 bp,  $T_m$ : 56-62°C for  
192 primers and 68 - 72°C for probes). Several candidate primers and probe sets were generated for each  
193 *nosZ* group, implementing the *min*, *max*, and *combo* algorithms of the Primux software. The  
194 performance of each candidate primers and probe set was predicted with *in silico* PCR performed

195 with the simulate\_PCR software against all complete genome sequences of the organisms belonging  
196 to each of the five *nosZ* groups (Table S1) (ref. 42, 43). Coverage within the target *nosZ* group and  
197 mutual exclusivity across the groups were the two major criteria for assessment of the candidate  
198 primers and probe sets. The *in silico* PCR tests were also performed against the complete genomes of  
199 50 bacterial strains lacking *nosZ* to preclude the possibility of unspecific detection.

200

### 201 **Experimental verification of the designed primer and probe sets on model N<sub>2</sub>O reducer strains** 202 **and construction of calibration curves**

203 For experimental verification of each *nosZ* primer and probe set, a model organism was selected  
204 harboring the targeted *nosZ* gene(s). The selected model organisms were *Pseudomonas stutzeri* DCP-  
205 Ps1 (NosZG1), *Acidovorax soli* DSM25157 (NosZG2), *Flavobacterium aquatile* LMG4008  
206 (NosZG3), *Ignavibacterium album* JCM16511 (NosZG4), and *Dechloromonas aromatica* RCB  
207 (NosZG5). *Acidovorax soli* DSM25157 and *F. aquatile* LMG4008 were acquired from Korean  
208 Collection for Type Cultures and *I. album* JCM16511 from Japanese Collection of Microorganisms.  
209 The axenic batch cultures of these organisms were prepared as previously described in the literature  
210 or using the media and incubation conditions specified by the distributors. The cells were harvested at  
211 OD<sub>600nm</sub> = 0.1 and the *nosZ* gene(s) in the DNA extracted from the cell pellets were amplified using  
212 the designed primers. The calibration curve for each qPCR reaction was constructed using ten-fold  
213 serial dilutions of PCR2.1<sup>®</sup> vectors (Invitrogen, Carlsbad, CA) carrying the *nosZ* amplicons. The  
214 thermocycle for the qPCR of NosZG1-G5 was as follows: 95°C for 10 min and 40 cycles of 95 °C for  
215 30 s, 58 °C for 60 s, and 72 °C for 60 s.

216

### 217 **Group specific quantitative PCR targeting *nosZ* gene in activated sludge samples**

218 The group-specific quantification of the *nosZ* genes in the activated sludge samples were performed  
219 with the designed primer and probe sets (Table 1) on a QuantStudio 3 real-time PCR instrument  
220 (Thermo Fisher Scientific, Waltham, MA) using TaqMan detection chemistry (FAM as the reporter  
221 and NFQ-MGB as the quencher). DNeasy Blood & Tissue Kit (QIAGEN) was used to extract DNA



222 from the activated sludge samples. Each 20- $\mu$ L qPCR reaction mix contained 10  $\mu$ L of 2X TaqMan  
223 master mix (Applied Biosystems, Foster city, CA, USA), 5  $\mu$ M each of the forward and reverse  
224 primers, 0.5  $\mu$ M of the probe, and 2  $\mu$ L of the DNA sample. Calibration curves were used to calculate  
225 the copy numbers of the targeted *nosZ* genes from the  $C_t$  values. Eubacterial 16S rRNA genes in the  
226 extracted DNA samples were quantified using the 1055F/1392R/Bac115Probe set for quantification  
227 of total bacterial population in the activated sludge samples. The copy numbers of the *nosZ* genes in  
228 the wastewater samples were normalized with the 16S rRNA gene copy numbers to facilitate  
229 comparison with the relative abundances of the *nosZ* groups from the metagenomic analyses.

230

231 The PCR amplicons of the Daejeon1 sample amplified with NosZG1-5 primer sets were sequenced  
232 using Illumina Miseq platform (San Diego, CA) at the Center for Health Genomics and Informatics at  
233 University of Calgary. The raw sequence reads have been deposited in the SRA database (accession  
234 number: PRJNA552418). After quality trimming and merging of the paired-end sequences, the  
235 sequences without the probe-binding region were removed, and the remaining reads were clustered  
236 into OTUs with 0.97 cut-off using cd-hit-est v. 4.6 (ref. 44). The OTUs were annotated using blastx  
237 against the bacterial Refseq database downloaded in June, 2018, with the e value cut off set to  $10^{-3}$   
238 and word size to 3 and no seg option,

239

#### 240 **Computational quantification of *nosZ* genes from shotgun metagenomes of the activated sludge** 241 **samples**

242 The DNA samples for shotgun metagenome sequencing were extracted from 50 mL each of the four  
243 activated sludge samples using DNeasy PowerSoil Kit (Qiagen). Sequencing of the metagenomic  
244 DNA was performed at MacroGen Inc., where Hiseq X Ten sequencing platform (Illumina, San Diego,  
245 CA) was used for generating 5-10 Gb of paired-end reads data with 150-bp read length. The raw  
246 sequence reads have been deposited in the NCBI short reads archive (SRA) database (accession  
247 numbers: PRJNA552406). The raw reads were then processed using Trimmomatic v0.36 software  
248 with the parameters set to the default values (ref. 45). The trimmed reads were translated into amino

249 acid sequences using all six possible reading frames and screened for clade I and II *nosZ* sequences  
250 using hidden Markov models (HMM). The two HMM algorithms for clade II *nosZ* were downloaded  
251 from the Fungene database (accessed in October 2016). As the HMM for clade I *nosZ* in the database  
252 had specificity issues, the HMM algorithm was constructed *de novo* using *hmmbuild* command of  
253 HMMER v3.1b1. The clade I *NosZ* sequences used to build the HMM were manually curated from  
254 the pool of *NosZ* sequences downloaded from the NCBI database (accessed in October 2016), to  
255 represent diverse subgroups within the clade (Table S3) (ref. 8, 10). The candidate partial *NosZ*  
256 sequences were extracted from the translated shotgun metagenome reads using the *hmmsearch*  
257 command of HMMER v3.1b1 with the e value cutoff set to  $10^{-5}$ . The nucleotide sequence reads  
258 corresponding to the extracted partial *NosZ* sequences (in separate bins for clade I and clade II *NosZ*)  
259 were assembled into contigs using metaSPAdes v3.12.0 with parameters set to default values (ref. 46).  
260 The assembled contigs with lengths shorter than 200 bp were filtered out. The overlapping contigs  
261 appearing in both clade I and clade II *NosZ* bins were identified by clustering the two sets of contigs  
262 against each other with a nucleotide identity cutoff of 1.0. The identified overlapping contigs were  
263 manually called to the correct bin according to the BLASTX results. The trimmed sequence reads  
264 were then mapped onto the contigs in the *nosZ* bins using Bowtie2 v2.2.6, yielding sequence  
265 alignments for the contigs and the mapped reads. The alignment files were further processed using  
266 samtools v0.1.19, and the PCR duplicates were removed using MarkDuplicates function of picard-  
267 tools v1.105 (ref. 47). The sequence coverages of the contigs were calculated using bedtools v2.17.0.  
268 The number of reads mapped on to the contigs were normalized with the lengths of the respective  
269 contigs. The contigs were assigned taxonomic classification using blastx, and those matching the taxa  
270 identified from amplicon sequencing were assigned to *NosZG1-5* bins, while those affiliated to  
271 *Ignavibacterium nosZ* were manually assigned to *NosZG4* (Table S5). The contigs without matching  
272 sequence were binned as ‘other *nosZ* sequences’. As no HMM method has been developed for rRNA  
273 genes, the sequence coverage of *rpoB* gene, a single-copy housekeeping gene, was used for  
274 normalization of the *nosZ* abundance data. The HMM algorithm for *rpoB* was downloaded from the  
275 Fungene database. The attempt to use 16S rRNA sequences extracted with Meta-RNA and assembled  
276 with EMIRGE as the template for mapping was not successful, as the coverage of the extracted 16S

277 rRNA sequences turned out to be an order of magnitude lower than the *rpoB* coverage (Data not  
278 shown) (ref. 48, 49).

279

## 280 **Results**

### 281 **Active N<sub>2</sub>O reducers enriched in fed-batch incubation with varying N<sub>2</sub>O concentrations**

282 The microbial communities of the three N<sub>2</sub>O-reducing enrichments, each prepared with different N<sub>2</sub>O  
283 concentrations, were analyzed to identify active N<sub>2</sub>O-reducing groups of microorganisms (Table S6).  
284 Screening for OTUs with >0.3% abundance in any of the three enrichments yielded 69 OTUs  
285 assigned to 33 genera in total, and 14 of these genera were identified with phylogenetic subgroups  
286 harboring clade I or clade II *nosZ*. The OTUs belonging to these putatively *nosZ*-harboring genera  
287 amounted to 50.8% – 63.2% of the total microbial population in the enrichments. The abundances of  
288 the genera putatively harboring clade II *nosZ* were observed to be greater than the genera harboring  
289 clade I of *nosZ* (Table S6). In the enrichment incubated with 20 ppmv N<sub>2</sub>O, *Cloacibacterium* (18.9%),  
290 *Flavobacterium* (14.2%), and *Acidovorax* (13.5%) were identified as the dominant genera.  
291 *Dechloromonas* (17.3%) and *Flavobacterium* (15.8%) were the dominant genera in the 200 ppmv  
292 enrichment, and *Dechloromonas* was the predominant population in the enrichment incubated with  
293 10000 ppmv of N<sub>2</sub>O, constituting 46.0% of the total microbial population.

294

### 295 **Designing of the degenerate *nosZ* primer/probe sets**

296 A phylogenetic tree was constructed with 174 translated NosZ sequences affiliated to the 14 genera  
297 putatively harboring active N<sub>2</sub>O-reducing organisms (Figure 1). The NosZ phylogenetic tree  
298 composed of five distinct branches (NosZG1 – NosZG5), to which each of the NosZ sequences was  
299 assigned (Figure 1). NosZG1 and NosZG2 were identified as clade I NosZ and NosZG3-NosZG5 as  
300 clade II NosZ. After the iterative process of designing candidate primers/probe sets and performing *in*  
301 *silico* PCR tests, the final sets of degenerate primers/probe sets were designed to comprehensively and  
302 exclusively target the five *nosZ* groups (Table 1). The *in-silico* PCR performed against 174 genomes  
303 from which the target *nosZ* sequences were extracted and 50 genomes without *nosZ* confirmed the  
304 high levels of coverage (57.3-100%) and complete exclusivity for all five degenerate primers/probe

305 sets (Table 1). The qPCR calibration curves were constructed with the selected model organisms  
306 (Figure, S3, Table S7), and despite the high levels of degeneracy (up to 108), amplification  
307 efficiencies above 90% were attained for all five primer and probe sets after rigorous optimization  
308 process.

309

310 **Cross-validation of the group-specific qPCR quantification results with shotgun metagenome**  
311 **data**

312 The *nosZ* gene abundances in the four activated sludge samples were quantified using the newly  
313 designed qPCR assays, and the *nosZ* sequences extracted from the shotgun metagenomes of these  
314 same samples were quantitatively analyzed in parallel, for cross-validation of the qPCR results  
315 (Figure 2). The qPCR results of the four activated sludge samples invariably showed the dominance  
316 of the clade II *nosZ* genes (NosZG3 and NosZG5) over clade I *nosZ* genes (NosZG1 and NosZG2),  
317 with at least five-fold higher copy numbers (Figure 3), suggesting the importance of clade II *nosZ*-  
318 possessing organisms in denitrification and N<sub>2</sub>O reduction in activated sludge reactors. The qPCR  
319 targeting the NosZG4 group failed to amplify the clade II *nosZ* belonging to this group. The NosZG4  
320 primers/probe set was designed from a single complete genome (*Ignavibacterium album*) and six  
321 sequences from metagenome assembled genomes (MAGs), which may have been insufficient to cover  
322 the sequence divergence of this *nosZ* subgroup.

323

324 The distribution of the *nosZ* sequences extracted from the shotgun metagenomes (contig statistics  
325 provided in Table S4) were also severely biased towards clade II, with the sequence coverages of the  
326 clade II *nosZ* groups higher than those of the clade I *nosZ* by at least 4.5 folds. The compositions of  
327 the *nosZ* genes exhibited high level of similarity across the activated sludge samples. The calculated  
328 relative abundances of the two most abundant groups, NosZG3 and NosZG5, were relatively  
329 consistent across the samples, varying by less than 1.7-fold. The contributions of NosZG1 and  
330 NosZG2 to the total *nosZ* abundances were minor in all of the samples and largely variable. The fold  
331 differences between the samples with the highest relative abundance of NosZG1 and NosZG2 and  
332 those with the lowest abundance were 3.5 and 2.3, respectively. The *nosZ* genes sorted as NosZG4

333 constituted <1.2% of the total *nosZ* genes grouped as NosZG1-NosZG5, suggesting that this *nosZ*  
334 group has less significant role in N<sub>2</sub>O reduction in activated sludge tanks than other analyzed groups.

335

336 As the qPCR data were normalized with the 16S rRNA copy numbers and the metagenome-derived  
337 data were normalized with the sequence coverages of *rpoB*, direct comparison of the outcomes was  
338 not possible; however, the similarity in the general trends was evident. The ratios of the *nosZ/rpoB*  
339 (metagenome) to *nosZ/16S* (qPCR) were within a narrow range between 1.6 and 2.4 for NosZG5  
340 across the four activated sludge samples. Quantification of other *nosZ* subgroups yielded less  
341 consistent results between the two methods. The *nosZ/rpoB*-to-*nosZ/16S* ratio varied from 3.3 to 25.9  
342 for NosZG3 and the results for less abundant NosZG1 and NosZG2 were less consistent. The  
343 *nosZ/rpoB*-to-*nosZ/16S* ratios of NosZG1 and NosZG2 for the Daejeon1 sample were 20.4 and 90.1,  
344 respectively, while these ratios were 1.9 and 1.8 for the Daejeon2 sample collected from the same  
345 WWTP at a different time of the year. Nevertheless, in 9 of the 16 qPCR assays performed (excluding  
346 NosZG4), the *nosZ/rpoB* and *nosZ/16S* ratios stayed within the same order of magnitude, and the  
347 general agreement with the metagenome-driven data that the NosZG3 and NosZG5 were the  
348 dominant *nosZ* subgroups indicated predictive accuracy of the group-specific quantification using the  
349 newly-designed primers.

350

351 The TaqMan-based qPCR assays were also compared with the most frequently used qPCR assays for  
352 clade I and clade II *nosZ* using SYBR green detection chemistry (Figure S1). The subpar  
353 amplification efficiencies of 1840F-2090R (targeting clade I *nosZ*; 79.3%) and nosZII-F-nosZII-R  
354 (targeting clade II *nosZ*; 61.9%) primer sets posed a critical accuracy problem for these SYBR Green  
355 based qPCR assays (Table S2). The abundances of clade I *nosZ*, as determined with the SYBR Green  
356 assays, were relatively consistent with the cumulative abundances of NosZG1 and NosZG2  
357 determined with the TaqMan qPCR assays, except for Daejeon1 sample, where the SYBR Green  
358 qPCR yielded 87 times lower copy numbers than the TaqMan qPCR. The SYBR Green qPCR with  
359 nosZII-F-nosZII-R primer set underestimated the clade II *nosZ* copy numbers by several orders of  
360 magnitudes for three of the four analyzed samples, with the largest difference (1.8 x 10<sup>3</sup>-fold)

361 observed with the Dajeon1 sample. The importance of the clade II *nosZ* among the N<sub>2</sub>O-reducing  
362 microbial community in these activated sludge samples would have gone unnoticed due to this  
363 underestimation, if the conventional qPCR assays were used as the sole means of *nosZ* quantification.

364

#### 365 **Analyses of the amplicons amplified with the *nosZ* qPCR primers**

366 The *nosZ* amplicons of the Daejeon1 sample, amplified with the newly-designed qPCR primers  
367 (NosZG1, NosZG2, NosZG3, and NosZG5), were sequenced and analyzed to check whether the  
368 qPCR reactions were comprehensive and mutually exclusive (Figure 4). As the NosZG4 primers  
369 failed to amplify the targeted genes, NosZG4 was excluded from the downstream analysis. The *nosZ*  
370 taxa extracted from the shotgun metagenome data matching the taxa observed in the amplicon  
371 analysis were considered as targeted by the primer and the probe. The *nosZ* genes of putative active  
372 N<sub>2</sub>O reducers captured by the NosZG1 and NosZG2 primer sets accounted for 54.2% of the entire  
373 pool of the clade I *nosZ* genes extracted from the shotgun metagenome. The NosZG3 and NosZG4  
374 primer sets captured 63.4% of the clade II *nosZ* genes recovered from the metagenome (Figure S2).  
375 No amplification outside the targeted group occurred for any of the primers, confirming the complete  
376 mutual exclusivity of these primers. Each of the qPCR assays were comprehensive within its target  
377 groups, as analyzed *nosZ* amplicon sequences covered all genera originally targeted by each primer  
378 and probe set.

379

380 Overall, the OTUs identified to be abundant from sequence analyses of the PCR amplicons coincided  
381 with the dominant *nosZ* OTUs from shotgun metagenome analysis. The OTUs affiliated to  
382 *Rhodobacter capsulatus*, Rhodobacteraceae bacterium QY30, *Hyphomicrobium denitrificans*, and  
383 *Bradyrhizobium* sp. were the dominant OTUs among the OTUs NosZG1 amplicons. The two most  
384 abundant *nosZ* OTUs among the NosZG3 amplicons were affiliated to *Flavobacterium columnare* and  
385 *Niastella koreensis*, which were also the most abundant *nosZ* taxa according to the metagenome  
386 analyses. Discrepancies between the amplicon sequencing data and the shotgun metagenome data  
387 were observed for NosZG2 and NosZG5 to some degree. The OTUs assigned to the genus *Thauera*  
388 and *Ruvrivorax gelatinosus* were the dominant among NosZG2, constituting 50.4% of the amplicons,

389 but together constituted only 2.2% of the metagenome-derived *nosZ* sequences belonging to this  
390 group. Instead, an OTU affiliated to *Ramlibacter tataouinensis* was recovered in high relative  
391 abundance in the metagenome-derived *nosZ* pool, suggesting possible misassembly due to the  
392 sequence similarity with *nosZ* of *R. gelatinosus*. The low relative abundance of *Dechloromonas*  
393 *aromatica* in the NosZG5 amplicons (0.2%) may also be explained as a consequence of possible  
394 misassembly, as the relative abundance of the OTU assigned to *Azospira oryzae* was much more  
395 abundant (54.6%) in the qPCR amplicon than in the metagenome-derived *nosZ* pool.

396

### 397 **Discussion**

398 Quantification of the functional genes encoding the nitrogen cycle enzymes (e.g., bacterial/archaeal  
399 *amoA*, comammox *amoA*, *nrfA*, and clade I and II *nosZ*) has been used in increasing number of  
400 studies across diverse disciplines of environmental sciences and engineering, as predictors of nitrogen  
401 cycling activity in diverse soil and aquatic environments (ref. 23, 50, 51, 52). Despite the frequent use  
402 of qPCR in determining the potential N<sub>2</sub>O-reducing populations, i.e., clade I and clade II *nosZ*-  
403 possessing microorganisms, the predictability of qPCR quantification has rarely been scrutinized in the  
404 previous studies. The new group-specific qPCR assays exhibited definite advantages over these  
405 frequently used primers. Although the targets were limited to the groups of *nosZ*-possessing  
406 organisms enriched with N<sub>2</sub>O in *ex situ* cultures, the copy numbers obtained were, in many cases,  
407 orders of magnitudes larger than those measured using 1840F/2090R (*nosZ* I) and nosZII-F/nosZII-  
408 R(*nosZ* II) primer sets. The diversity of the sequences recovered in the amplicon sequences indicates  
409 the exhaustive coverages of the qPCR assays developed in this study within the targeted groups. Most  
410 of the major *nosZ* OTUs (>1% in relative abundance) recovered in metagenome-based *nosZ* profiling  
411 of the examined activated sludge samples were amplified with exactly one of the four primer sets,  
412 thus confirming the absolute mutual exclusiveness of the primers/probe sets. The amplicon  
413 sequencing results suggest trade-offs between coverage and specificity when choosing between  
414 SYBR Green and TaqMan chemistry, as the probes select against non-*nosZ* sequences but reduce the  
415 diversity of covered *nosZ* sequences.

416



417 The major *nosZ*-possessing organisms identified in the qPCR and metagenomic analyses differ greatly  
418 from the major *nosZ*-possessing populations of the agricultural soils analyzed previously with shotgun  
419 metagenome sequencing (ref. 33). None of the six most abundant *nosZ* phylogenetic groups in the  
420 Havana and Urbana agricultural research site soils (the *nosZ* genes affiliated to *Anaeromyxobacter*,  
421 *Opitutus*, *Hydrogenobacter*, *Ignavibacterium*, *Dyedobacter*, and *Gemmatimonas*) was identified as a  
422 major population in any of the activated sludge samples examined in this study. Of the organisms  
423 affiliated to these genera, *Anaeromyxobacter dehalogenans* and *Gemmatimonas aurentiaca* have been  
424 confirmed of N<sub>2</sub>O reduction activity; however, the N<sub>2</sub>O reduction rates measured *in vitro* were orders  
425 of magnitudes lower for these organisms than other examined N<sub>2</sub>O-reducing organisms throughout  
426 the entire range of N<sub>2</sub>O concentration, and *G. aurantiaca* lacked the capability to utilize N<sub>2</sub>O as the  
427 growth substrate (ref. 10, 12, 38). The differences in the compositions of the *nosZ*-possessing  
428 populations may be attributed to the inherent difference in the rates of the biochemical turnover  
429 processes in WWTP activated sludges and soils. Rapid nitrogen cycling reactions take place on a  
430 constant basis in WWTPs, while the time scale of the biogeochemical processes in agricultural soils is  
431 orders of magnitude longer and often, nitrogen supply provided through fertilization and plant  
432 exudation is sparse and sporadic (ref. 53). Besides, upland agricultural soils are often well-aerated and  
433 thus, the capability of N<sub>2</sub>O utilization would not provide specific benefits to the *nosZ*-harboring  
434 organisms at ordinary dry conditions (ref. 54). In fact, incubation of soil microbial consortium with  
435 N<sub>2</sub>O in the same fed-batch cultivation resulted in enrichment of similar organismal groups as  
436 observed in the activated sludge (e.g., *Pseudomonas*, *Flavobacterium*, *Acidovorax*, and  
437 *Chryseobacterium*), suggesting that under occasions of pulse stimulation of denitrification and N<sub>2</sub>O  
438 reduction, e.g., flooding events immediately following fertilization, these organisms may become the  
439 relevant N<sub>2</sub>O sinks in soils (Table S8).

440

441 *Ignavibacterium* spp. were identified in all enrichment cultures and the activated sludge samples in  
442 significant populations (>0.1% of the total 16S rRNA amplicon sequences), and *nosZ* gene sequences  
443 affiliated to this genus were recovered in the shotgun metagenome data as well. The only isolated  
444 strain of the genus, *Ignavibacterium album* strain JCM 16511 had identified the organismal group as a



445 strict anaerobe only capable of growth on fermentation; however the enrichment of these organisms,  
446 albeit modest, in the fed-batch cultures provided only with a non-fermentable electron donor  
447 suggested the possibility that these understudied organisms may be capable of growth on N<sub>2</sub>O  
448 respiration (ref. 55, 56). Presumably due to the paucity of sequence information used to design the  
449 degenerate primers/probes, the NosZG4 primers/probe set designed to target the *nosZ* affiliated to  
450 *Iganvibacterium* spp. was not successful in detecting these *nosZ* sequences. The development of  
451 quantitative molecular tools targeting this group may need to wait until more isolates and sequenced  
452 genomes are available. Nevertheless, the future investigations of this unique non-phototrophic  
453 member of the *Chlorobi* phylum may bring about novel insights to unique N<sub>2</sub>O reduction physiology.

454

455 In summary, the group-specific *nosZ* qPCR methods developed in this study substantially improved  
456 the accuracy in estimating the population of *nosZ*-possessing organisms, especially those harboring  
457 the novel clade II *nosZ*. Cross-checking with the *nosZ* sequences extracted from the shotgun  
458 metagenome verified that the NosZG1-5 primers/probe sets are comprehensive within the groups and  
459 mutually exclusive, and thus are definite improvement over the previously available clade I and clade  
460 II *nosZ* primer sets in this respect. Any methods for quantification of functional genes are prone to  
461 error, and the *nosZ* qPCR methods developed here also have certain deficiencies, including inability  
462 to amplify *nosZ* genes affiliated to relatively abundant *Iganvibacterium* spp. In designing the group-  
463 specific primers, a trade-off between coverage and mutual exclusivity was inevitable, which could  
464 have been the cause of modest discrepancy with the metagenome data. Nevertheless, despite these  
465 drawbacks, there is little doubt that the qPCR assays developed in this study are the most reliable  
466 tools for real-time quantification of the environmentally significant *nosZ* genes available to date.  
467 These tools are expected to be immensely useful not only for estimation of overall N<sub>2</sub>O-reducing  
468 capability of a microbiome, but also for identification of the key N<sub>2</sub>O-reducing population in different  
469 soil and aquatic environments.

470

471 **Acknowledgements**

472 This work was financially supported by “the R&D Center for reduction of Non-CO2 Greenhouse  
473 Gases (Grant No. 2017002420002)” funded by Korea Ministry of Environment (MOE).

474

#### 475 **Conflict of interest**

476 The authors declare that they have no competing interests.

477

#### 478 **References**

- 479 1. Ciais P, Sabine C, Bala G, Bopp L, Brovkin V, Canadell J *et al.* Carbon and other  
480 biogeochemical cycles. *Climate change 2013: the physical science basis. Contribution of*  
481 *Working Group I to the Fifth Assessment Report of the Intergovernmental Panel on Climate*  
482 *Change*. Cambridge University Press: Cambridge, UK, 2014, pp 465-570.
- 483 2. Ravishankara A, Daniel JS, Portmann RW. Nitrous oxide (N<sub>2</sub>O): the dominant ozone-  
484 depleting substance emitted in the 21st century. *Science* 2009; **326**: 123-125.
- 485 3. Portmann R, Daniel J, Ravishankara A. Stratospheric ozone depletion due to nitrous oxide:  
486 influences of other gases. *Phil Trans Royal Soc B*. 2012; **367**: 1256-1264.
- 487 4. Yoon S, Song B, Phillips RL, Chang J, Song MJ. Ecological and physiological implications  
488 of nitrogen oxide reduction pathways on greenhouse gas emissions in agroecosystems. *FEMS*  
489 *Microbiol Ecol*. 2019; **95**: fiz066.
- 490 5. Law Y, Ye L, Pan Y, Yuan Z. Nitrous oxide emissions from wastewater treatment processes.  
491 *Phil Trans Royal Soc B*. 2012; **367**: 1265-1277.
- 492 6. Thomson AJ, Giannopoulos G, Pretty J, Baggs EM, Richardson DJ. Biological sources and  
493 sinks of nitrous oxide and strategies to mitigate emissions. *Philos Trans Royal Soc B*. 2012;  
494 **367**: 1157-1168.
- 495 7. Frutos OD, Quijano G, Aizpuru A, Muñoz R. A state-of-the-art review on nitrous oxide  
496 control from waste treatment and industrial sources. *Biotechnol Adv*. 2018; **36**: 1025-1037.
- 497 8. Hallin S, Philippot L, Löffler FE, Sanford RA, Jones CM. Genomics and ecology of novel  
498 N<sub>2</sub>O-reducing microorganisms. *Trends Microbiol*. 2017; **26**: 43-55.

- 499 9. Zumft WG. Cell biology and molecular basis of denitrification. *Microbiol Mol Biol Rev.* 1997;  
500 **61**: 533-616.
- 501 10. Sanford RA, Wagner DD, Wu Q, Chee-Sanford JC, Thomas SH, Cruz-García C *et al.*  
502 Unexpected nondenitrifier nitrous oxide reductase gene diversity and abundance in soils. *Proc*  
503 *Natl Acad Sci.* 2012; **109**: 19709-19714.
- 504 11. Jones CM, Spor A, Brennan FP, Breuil M-C, Bru D, Lemanceau P *et al.* Recently identified  
505 microbial guild mediates soil N<sub>2</sub>O sink capacity. *Nat Clim Change.* 2014; **4**: 801-805.
- 506 12. Yoon S, Nissen S, Park D, Sanford RA, Löffler FE. Nitrous oxide reduction kinetics  
507 distinguish bacteria harboring clade I versus clade II NosZ. *Appl Environ Microbiol.* 2016; **82**:  
508 3793-3800.
- 509 13. Suenaga T, Riya S, Hosomi M, Terada A. Biokinetic characterization and activities of N<sub>2</sub>O-  
510 reducing bacteria in response to various oxygen levels. *Front Microbiol.* 2018; **9**: 697.
- 511 14. Domeignoz-Horta LA, Spor A, Bru D, Breuil m-c, Bizouard F, Leonard J *et al.* The diversity  
512 of the N<sub>2</sub>O reducers matters for the N<sub>2</sub>O:N<sub>2</sub> denitrification end-product ratio across an annual  
513 and a perennial cropping system. *Front Microbiol* 2015; **6**: 971.
- 514 15. Yoon H, Song MJ, Yoon S. Design and feasibility analysis of a self-sustaining biofiltration  
515 system for removal of low concentration N<sub>2</sub>O emitted from wastewater treatment plants.  
516 *Environ Sci Technol.* 2017; **51**: 10736-10745.
- 517 16. Yoon H, Song MJ, Kim DD, Sabba F, Yoon S. A serial biofiltration system for effective  
518 removal of low-concentration nitrous oxide in oxic gas streams: mathematical modeling of  
519 reactor performance and experimental validation. *Environ Sci Technol.* 2019; **53**: 2063-2074.
- 520 17. Morales SE, Cosart T, Holben WE. Bacterial gene abundances as indicators of greenhouse  
521 gas emission in soils. *ISME J.* 2010; **4**: 799.
- 522 18. Henry S, Bru D, Stes B, Hallet S, Philippot L. Quantitative detection of the *nosZ* gene,  
523 encoding nitrous oxide reductase, and comparison of the abundances of 16S rRNA, *narG*,  
524 *nirK*, and *nosZ* genes in soils. *Appl Environ Microbiol.* 2006; **72**: 5181-5189.

- 525 19. Conthe M, Wittorf L, Kuenen JG, Kleerebezem R, van Loosdrecht MCM, Hallin S. Life on  
526 N<sub>2</sub>O: deciphering the ecophysiology of N<sub>2</sub>O respiring bacterial communities in a continuous  
527 culture. *ISME J.* 2018; **12**: 1142-1153.
- 528 20. Juhanson J, Hallin S, Söderström M, Stenberg M, Jones CM. Spatial and phyloecological  
529 analyses of *nosZ* genes underscore niche differentiation amongst terrestrial N<sub>2</sub>O reducing  
530 communities. *Soil Biol Biochem.* 2017; **115**: 82-91.
- 531 21. Domeignoz-Horta LA, Philippot L, Peyrard C, Bru D, Breuil M-C, Bizouard F *et al.* Peaks of  
532 in situ N<sub>2</sub>O emissions are influenced by N<sub>2</sub>O-producing and reducing microbial communities  
533 across arable soils. *Glob Change Biol.* 2018; **24**: 360-370.
- 534 22. Jones CM, Graf DR, Bru D, Philippot L, Hallin S. The unaccounted yet abundant nitrous  
535 oxide-reducing microbial community: a potential nitrous oxide sink *ISME J.* 2013; **7**: 417.
- 536 23. Ma Y, Zilles JL, Kent AD. An evaluation of primers for detecting denitrifiers via their  
537 functional genes. *Environ Microbiol.* 2019; **21**: 1196-1210.
- 538 24. Hatt JK, Löffler FE. Quantitative real-time PCR (qPCR) detection chemistries affect  
539 enumeration of the *Dehalococcoides* 16S rRNA gene in groundwater. *J Microbiol Methods.*  
540 2012; **88**: 263-270.
- 541 25. Graf DRH, Zhao M, Jones CM, Hallin S. Soil type overrides plant effect on genetic and  
542 enzymatic N<sub>2</sub>O production potential in arable soils. *Soil Biol Biochem* 2016; **100**: 125-128.
- 543 26. Paranychianakis NV, Tsiknia M, Kalogerakis N. Pathways regulating the removal of nitrogen  
544 in planted and unplanted subsurface flow constructed wetlands. *Water Res.* 2016; **102**: 321-  
545 329.
- 546 27. Waller LJ, Evanylo GK, Krometis L-AH, Strickland MS, Wynn-Thompson T, Badgley BD.  
547 Engineered and environmental controls of microbial denitrification in established bioretention  
548 cells. *Environ Sci Technol.* 2018; **52**: 5358-5366.
- 549 28. Di HJ, Cameron KC, Podolyan A, Robinson A. Effect of soil moisture status and a  
550 nitrification inhibitor, dicyandiamide, on ammonia oxidizer and denitrifier growth and nitrous  
551 oxide emissions in a grassland soil. *Soil Biol Biochem* 2014; **73**: 59-68.

- 552 29. Stoliker DL, Repert DA, Smith RL, Song B, LeBlanc DR, McCobb TD *et al.* Hydrologic  
553 controls on nitrogen cycling processes and functional gene abundance in sediments of a  
554 groundwater flow-through lake. *Environ Sci Technol.* 2016; **50**: 3649-3657.
- 555 30. Orellana LH, Konstantinidis KT, Rodriguez-R LM. ROcker: accurate detection and  
556 quantification of target genes in short-read metagenomic data sets by modeling sliding-  
557 window bitscores. *Nucleic Acids Res.* 2016; **45**: e14-e14.
- 558 31. Sunagawa S, Coelho LP, Chaffron S, Kultima JR, Labadie K, Salazar G *et al.* Structure and  
559 function of the global ocean microbiome. *Science* 2015; **348**: 1261359.
- 560 32. Li L, Yin X, Jiang X-T, Zhang T, Chai B, Cole JR *et al.* ARGs-OAP v2.0 with an expanded  
561 SARG database and Hidden Markov Models for enhancement characterization and  
562 quantification of antibiotic resistance genes in environmental metagenomes. *Bioinformatics*  
563 2018; **34**: 2263-2270.
- 564 33. Orellana LH, Rodriguez-R LM, Higgins S, Chee-Sanford JC, Sanford RA, Ritalahti KM *et al.*  
565 Detecting nitrous oxide reductase (*nosZ*) genes in soil metagenomes: method development  
566 and implications for the nitrogen cycle. *MBio* 2014; **5**: e01193-14.
- 567 34. Orellana LH, Chee-Sanford JC, Sanford RA, Löffler FE, Konstantinidis KT. Year-round  
568 shotgun metagenomes reveal stable microbial communities in agricultural soils and novel  
569 ammonia oxidizers responding to fertilization. *Appl. Environ Microbiol.* 2017; **84**: e01646-17.
- 570 35. Quince C, Walker AW, Simpson JT, Loman NJ, Segata N. Shotgun metagenomics, from  
571 sampling to analysis. *Nat Biotechnol.* 2017; **35**: 833.
- 572 36. Svec D, Tichopad A, Novosadova V, Pfaffl MW, Kubista M. How good is a PCR efficiency  
573 estimate: recommendations for precise and robust qPCR efficiency assessments. *Biomol*  
574 *Detect Quantif.* 2015; **3**: 9-16.
- 575 37. Yoon S, Sanford RA, Löffler FE. *Shewanella* spp. use acetate as an electron donor for  
576 denitrification but not ferric iron or fumarate reduction. *Appl Environ Microbiol.* 2013; **79**:  
577 2818-2822.
- 578 38. Park D, Kim H, Yoon S. Nitrous oxide reduction by an obligate aerobic bacterium  
579 *Gemmatimonas aurantiaca* strain T-27. *Appl Environ Microbiol.* 2017; **83**: e00502-17.

- 580 39. Ritalahti KM, Amos BK, Sung Y, Wu Q, Koenigsberg SS, Löffler FE. Quantitative PCR  
581 targeting 16S rRNA and reductive dehalogenase genes simultaneously monitors multiple  
582 *Dehalococcoides* strains. *Appl Environ Microbiol* 2006; **72**: 2765-2774.
- 583 40. Edgar RC. MUSCLE: multiple sequence alignment with high accuracy and high throughput.  
584 *Nucleic Acids Res* 2004; **32**: 1792-1797.
- 585 41. Kumar S, Stecher G, Tamura K. MEGA7: Molecular Evolutionary Genetics Analysis Version  
586 7.0 for bigger datasets. *Mol Biol Evol* 2016; **33**: 1870-1874.
- 587 42. Hysom DA, Naraghi-Arani P, Elsheikh M, Carrillo AC, Williams PL, Gardner SN. Skip the  
588 alignment: degenerate, multiplex primer and probe design using K-mer matching instead of  
589 alignments. *PloS One* 2012; **7**: e34560.
- 590 43. Gardner SN, Slezak TJBB. Simulate\_PCR for amplicon prediction and annotation from  
591 multiplex, degenerate primers and probes. *BMC Bioinformatics* 2014; **15**: 237.
- 592 44. Li W, Godzik A. Cd-hit: a fast program for clustering and comparing large sets of protein or  
593 nucleotide sequences. *Bioinformatics* 2006; **22**: 1658-1659.
- 594 45. Bolger AM, Lohse M, Usadel B. Trimmomatic: a flexible trimmer for Illumina sequence data.  
595 *Bioinformatics* 2014; **30**: 2114-2120.
- 596 46. Nurk S, Meleshko D, Korobeynikov A, Pevzner PA. metaSPAdes: a new versatile  
597 metagenomic assembler. *Genome Res.* 2017; **27**: 824-834.
- 598 47. Li H, Handsaker B, Wysoker A, Fennell T, Ruan J, Homer N *et al.* The sequence  
599 alignment/map format and SAMtools. *Bioinformatics* 2009; **25**: 2078-2079.
- 600 48. Miller CS, Baker BJ, Thomas BC, Singer SW, Banfield JF. EMIRGE: reconstruction of full-  
601 length ribosomal genes from microbial community short read sequencing data. *Genome Biol.*  
602 2011; **12**: R44.
- 603 49. Huang Y, Gilna P, Li W. Identification of ribosomal RNA genes in metagenomic fragments.  
604 *Bioinformatics* 2009; **25**: 1338-1340.
- 605 50. Pjevac P, Schauburger C, Poghosyan L, Herbold CW, van Kessel MAHJ, Daebeler A *et al.*  
606 *AmoA*-targeted polymerase chain reaction primers for the specific detection and quantification  
607 of comammox *Nitrospira* in the environment. *Front Microbiol.* 2017; **8**: 1508.

- 608 51. Meinhardt KA, Bertagnolli A, Pannu MW, Strand SE, Brown SL, Stahl DA. Evaluation of  
609 revised polymerase chain reaction primers for more inclusive quantification of ammonia-  
610 oxidizing archaea and bacteria. *Environ Microbiol Rep.* 2015; **7**: 354-363.
- 611 52. Chen X, Peltier E, Sturm BSM, Young CB. Nitrogen removal and nitrifying and denitrifying  
612 bacteria quantification in a stormwater bioretention system. *Water Res* 2013; **47**: 1691-1700.
- 613 53. Cassman KG, Dobermann A, Walters DT. Agroecosystems, nitrogen-use efficiency, and  
614 nitrogen management. *Ambio.* 2002; **31**: 132-140, 139.
- 615 54. Aulakh MS, Khera TS, Doran JW. Mineralization and denitrification in upland, nearly  
616 saturated and flooded subtropical soil I. Effect of nitrate and ammoniacal nitrogen. *Biol Fert*  
617 *Soils.* 2000; **31**: 162-167.
- 618 55. Iino T, Mori K, Uchino Y, Nakagawa T, Harayama S, Suzuki K-I. *Ignavibacterium album*  
619 gen. nov., sp. nov., a moderately thermophilic anaerobic bacterium isolated from microbial  
620 mats at a terrestrial hot spring and proposal of *Ignavibacteria* classis nov., for a novel lineage  
621 at the periphery of green sulfur bacteria. *Int J Syst Evol Microbiol.* 2010; **60**: 1376-1382.
- 622 56. Liu Z, Frigaard N-U, Vogl K, Iino T, Ohkuma M, Overmann J *et al.* Complete genome of  
623 *Ignavibacterium album*, a metabolically versatile, flagellated, facultative anaerobe from the  
624 phylum *Chlorobi*. *Front Microbiol.* 2012; **3**: 185.

625

## 626 **Figure legend**

627 **Figure 1.** The phylogenetic tree of 174 *nosZ* sequences belonging to 14 genera enriched after fed-  
628 batch incubation with N<sub>2</sub>O. The *nosZ* sequences were imported from full, draft, and metagenome-  
629 assembled genome sequences imported from the NCBI database and the tree was built using  
630 neighbor-joining algorithm with 500 bootstrap replicates

631 **Figure 2.** Flow chart for designing of the group-specific *nosZ* primer/probe sets and cross-validation  
632 with *nosZ* sequence data extracted from shotgun metagenome data

633 **Figure 3.** The relative abundances of NosZG1-5 *nosZ* genes as quantified using qPCR and  
634 metagenome analysis. The *nosZ* copy numbers from the qPCR assays were normalized with the copy  
635 numbers of eubacterial 16S rRNA genes. The coverages of *nosZ* genes in the metagenome data were  
636 normalized with the coverages of *rpoB* genes

637 **Figure 4.** The phylogenetic tree constructed with the OTUs generated from the partial *nosZ* sequences  
638 amplified with NosZG1-5 primers. The phylogenetic tree was generated using neighbor-joining  
639 method with 500 bootstrap replications. The heatmap shows the relative abundances of the OTUs  
640 within each *nosZ* group, computed from the amplicon sequencing data and the *nosZ* sequence data  
641 extracted from the metagenome



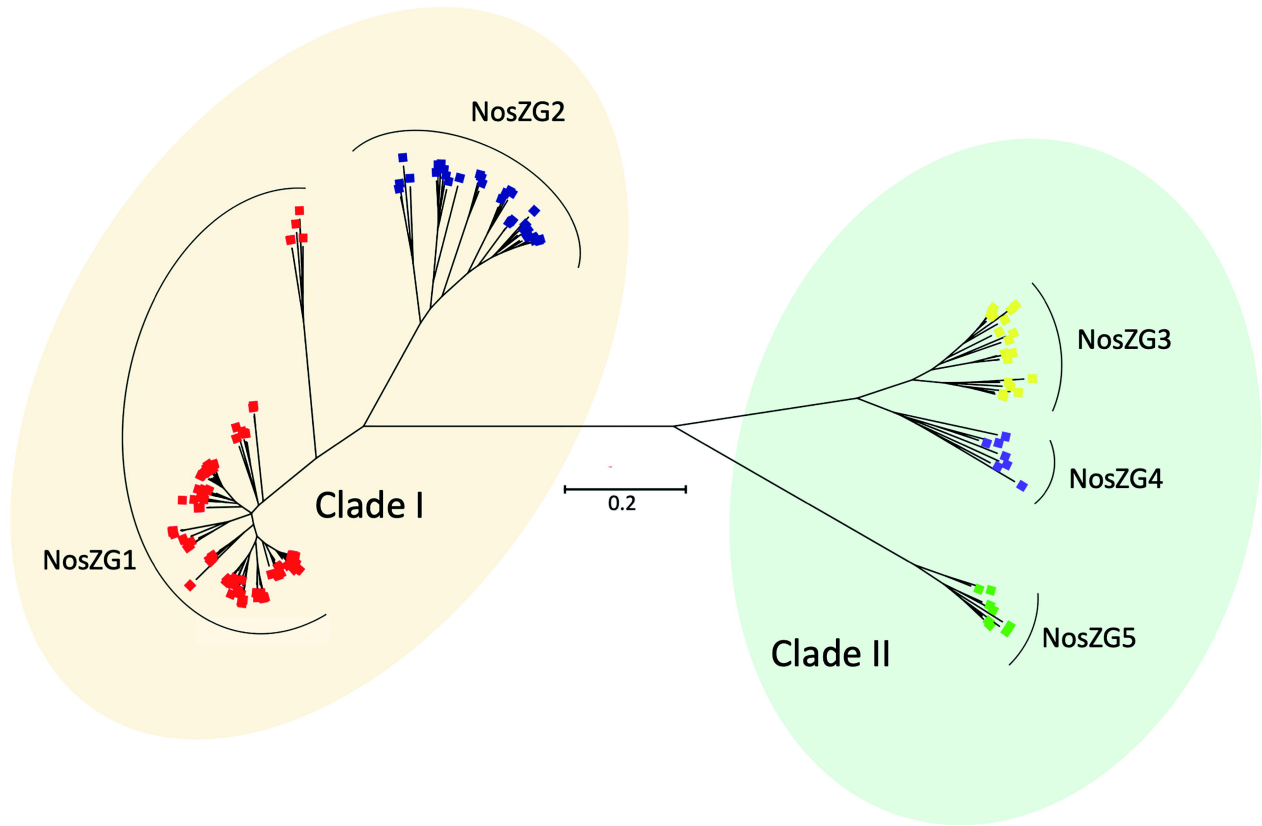

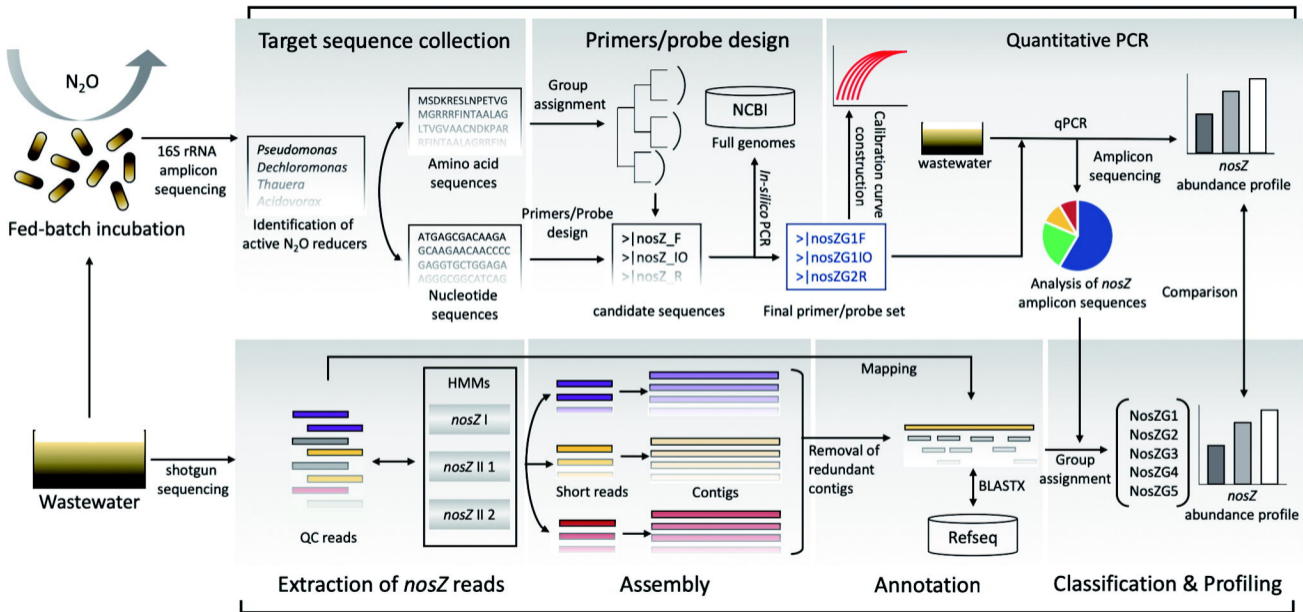

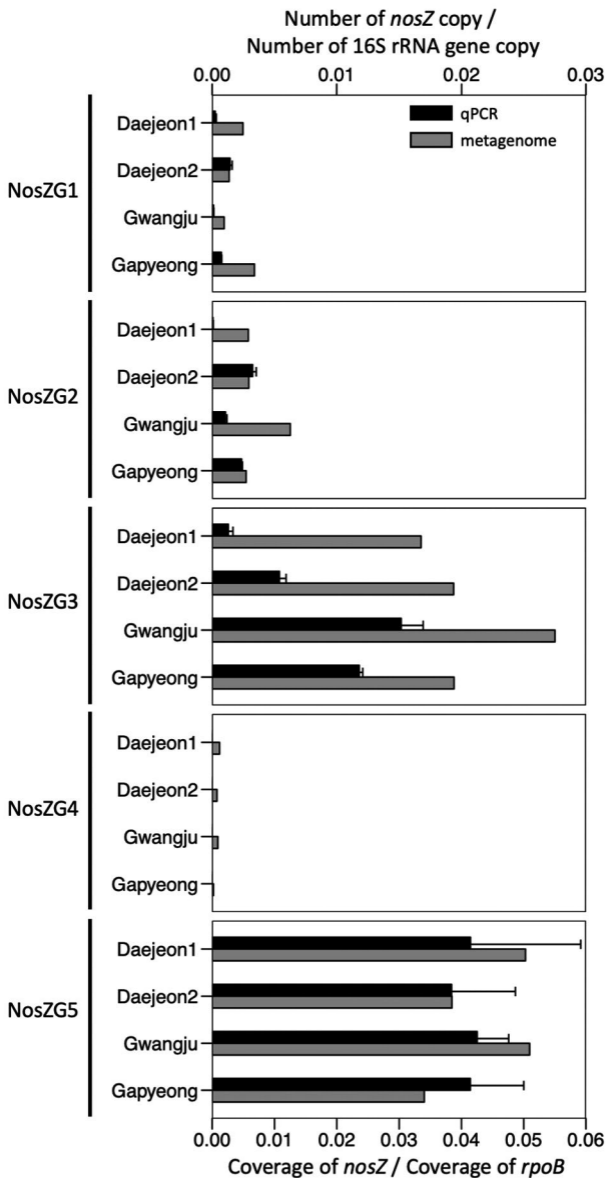

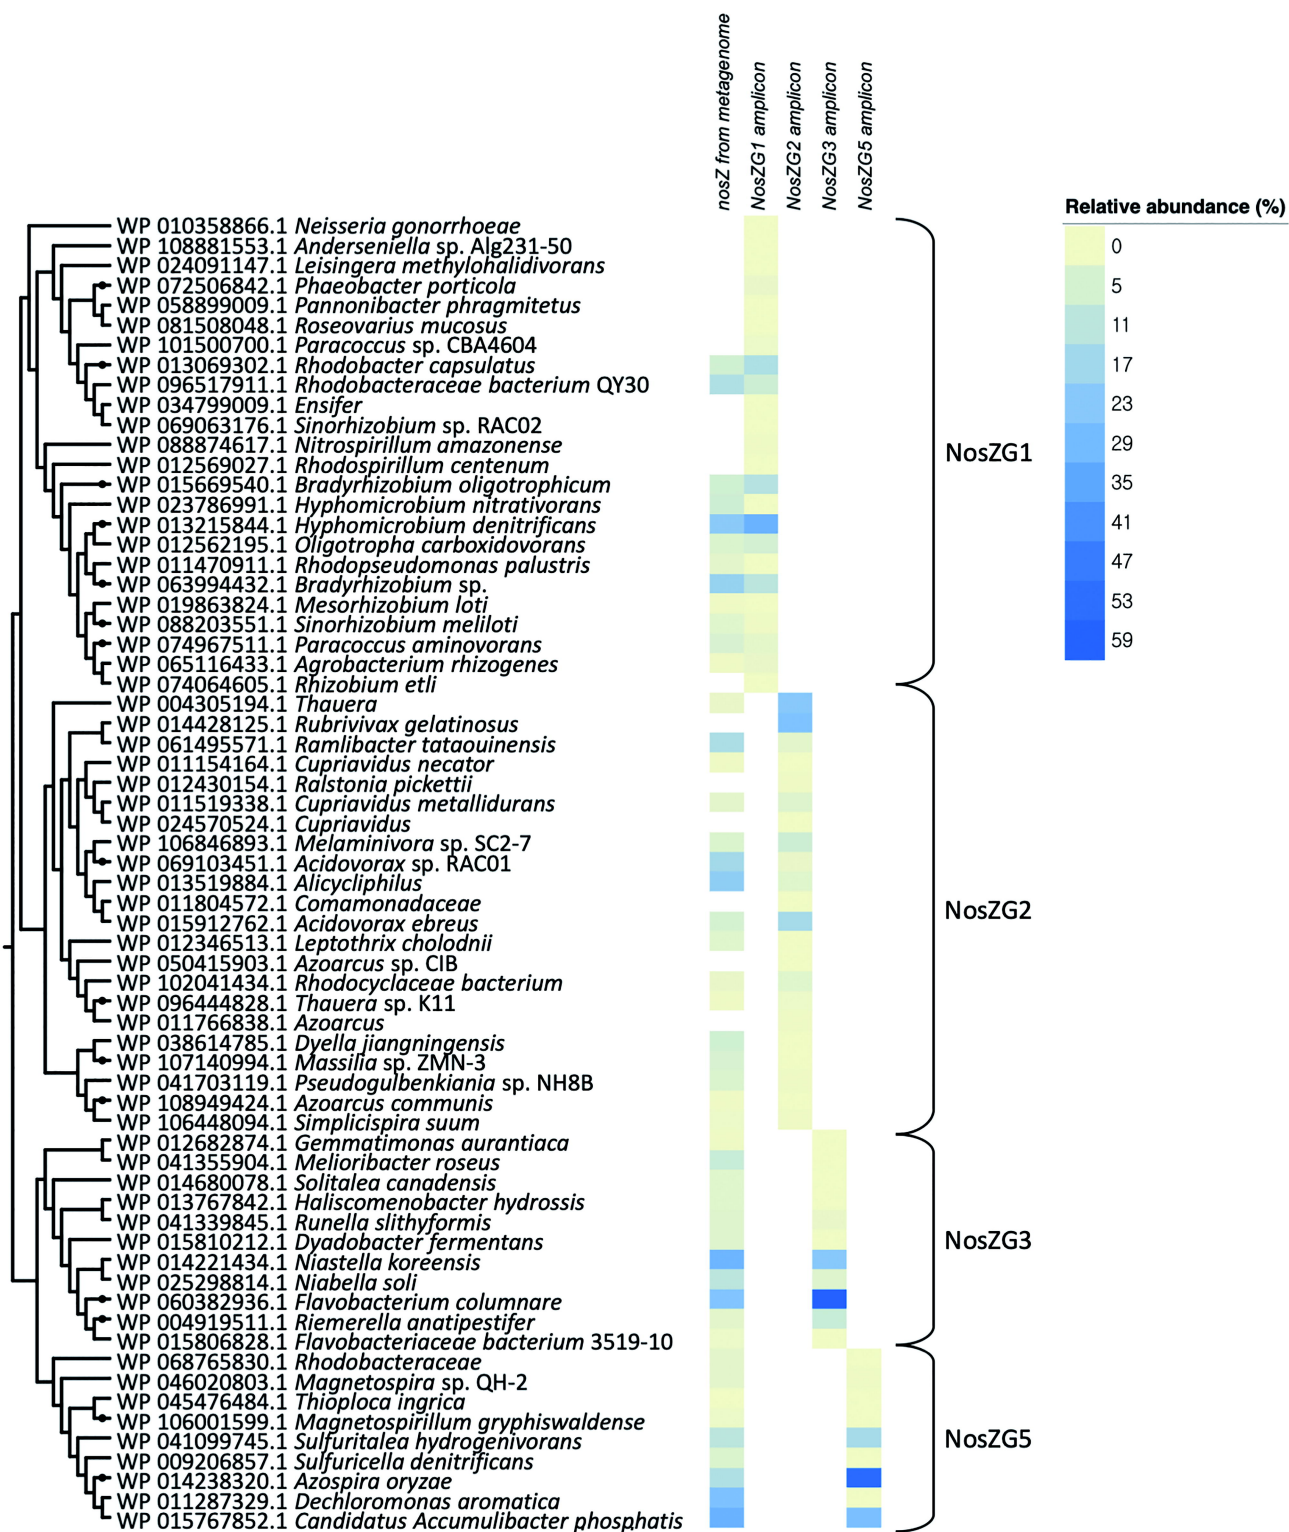

Table 1. The primers/probe sets developed in this study for group-specific quantification of *nosZ* genes

| Clade    | Group  | Primers / Probe | Sequence (5' → 3')                               | Degeneracy | Coverage         | Slope | Y-intercept | Efficiency (%) |
|----------|--------|-----------------|--------------------------------------------------|------------|------------------|-------|-------------|----------------|
| Clade I  | NosZG1 | NosZG1F         | AAG GTN CGB GTN TAC ATG                          | 48         | 70%<br>(77/110)  | -3.28 | 36.84       | 91.6           |
|          |        | NosZG1R         | CSN NCA TYT CCA TGT GCA                          | 64         |                  |       |             |                |
|          |        | NosZG1P         | FAM-ACT GCM VBT GGT TCT GCC AYG C-MGBNFQ         | 36         |                  |       |             |                |
|          | NosZG2 | NosZG2F         | GRC ATC WKC MMC GAC AAG                          | 32         | 84.4%<br>(27/32) | -3.49 | 38.22       | 93.4           |
|          |        | NosZG2R         | HYC TCG RYG TTG TAC TGG                          | 24         |                  |       |             |                |
|          |        | NosZG2P         | FAM-ACC ACS CGC GTG TTC TGC G-MGBNFQ             | 2          |                  |       |             |                |
| Clade II | NosZG3 | NosZG3F         | CAY TTT GCW CCD GAY AAT ATT GAA                  | 24         | 95%<br>(19/22)   | -3.56 | 40.04       | 90.7           |
|          |        | NosZG3R         | BSH WGT TTC ACC BGG CAT                          | 108        |                  |       |             |                |
|          |        | NosZG3P         | FAM-AAY YTR GAA CAA GAY TGG GAT GTA CCK C-MGBNFQ | 32         |                  |       |             |                |
|          | NosZG4 | NosZG4F         | ATW GTT GCY GGH GGM AAA                          | 24         | 57.1%<br>(4/7)   | -3.41 | 38.39       | 94.9           |
|          |        | NosZG4R         | TTC CCA DGT KCC DAW TTT                          | 36         |                  |       |             |                |
|          |        | NosZG4P         | FAM-MGG YGA AGT KSA GAA TCC GGG WT-MGBNFQ        | 32         |                  |       |             |                |
|          | NosZG5 | NosZG5F         | AAC GAC AAG KCS AAY CCG                          | 8          | 100%<br>(5/5)    | -3.36 | 38.87       | 97.7           |
|          |        | NosZG5R         | GCG GTC GAA CTT CCA GTA                          | 0          |                  |       |             |                |
|          |        | NosZG5P         | FAM-GCS GTG MTC GAY CTG CGB G-MGBNFQ             | 24         |                  |       |             |                |
